# Supplementary material for: MapIT!: a simple and user-friendly MATLAB script to elaborate elemental distribution images from LA-ICP-MS data
Source: Royal Society of Chemistry journal article supplement (doi:10.1039/c7ja00023e), 2017-01-01
Supplement: c7ja00023e2.zip [file c7ja00023e2.zip]

## Sheet: Rawdata
LA-map-VEMA- 1 29/12/2016 12:23:06 (Run: 1)
202000	266.7	2800	5035	2834	4835	133.3	9405	100	1167	1600	0	0	0	0	66.67	0	0	0	0	0	0	0	0	0	0	33.33	0	0	0	0	0	0
202800	66.67	2167	3901	2867	4134	100	12410	100	966.7	1300	33.33	0	0	33.33	0	0	0	0	0	0	0	0	0	0	0	0	0	0	0	33.33	0	0
202700	800	2167	4501	3000	3801	0	8637	0	833.4	1433	33.33	66.67	0	0	0	0	0	0	0	33.33	0	0	0	33.33	0	0	0	0	0	66.67	0	0
198500	500	2367	4368	2700	4034	66.67	9271	100	900	1467	0	0	0	0	0	0	0	0	0	0	0	0	0	0	0	0	33.33	0	0	66.67	0	0
191700	100	1500	3834	3434	3901	100	7837	33.33	733.4	1067	0	33.33	0	0	0	0	0	0	0	0	0	0	0	0	0	0	0	0	0	66.67	0	0
201400	366.7	2867	4101	3567	3567	200	8237	66.67	1033	1000	0	33.33	0	0	0	0	0	0	0	0	0	0	0	0	0	0	0	0	0	33.33	0	0
194500	166.7	3467	3567	3067	3534	33.33	7603	0	766.7	1200	0	0	0	33.33	0	33.33	0	0	0	0	0	0	33.33	0	0	0	0	0	0	166.7	0	33.33
202500	633.4	2200	4901	3234	3501	0	7370	66.67	1067	1533	33.33	0	0	0	0	0	0	0	0	0	0	0	0	0	33.33	0	0	0	0	33.33	0	0
197500	200	866.7	3601	3567	3567	66.67	7303	100	733.4	1200	0	0	0	0	0	0	0	0	0	0	0	0	0	0	0	0	0	0	0	200	0	0
199200	166.7	1867	4101	3601	3968	100	8337	33.33	833.4	1400	0	0	0	0	0	0	0	0	0	0	0	0	0	0	0	0	0	0	0	66.67	0	0
204300	133.3	2100	4735	3101	3667	133.3	8571	33.33	933.4	1267	0	0	0	0	0	0	0	33.33	0	0	0	0	33.33	0	0	0	0	0	0	33.33	0	0
198100	66.67	2667	4601	3867	4034	66.67	6836	100	1100	1567	0	33.33	0	0	0	0	0	0	0	0	0	0	0	0	0	0	0	0	0	33.33	0	0
197900	200	1834	3834	3334	3367	33.33	8037	100	800	1333	0	0	0	0	0	0	0	0	0	0	0	0	0	0	0	0	0	0	0	33.33	0	0
198200	33.33	1400	3567	2967	3701	100	7370	33.33	1067	1633	0	0	0	0	0	0	0	0	0	0	0	0	0	0	0	33.33	0	0	0	33.33	0	0
193500	200	1200	3968	3134	3767	0	7403	166.7	733.4	1500	33.33	0	0	0	0	0	0	0	0	0	0	0	0	0	66.67	0	0	0	0	66.67	0	0
203400	0	1567	3434	3334	3267	100	8204	100	1067	1467	0	0	0	0	0	0	0	0	0	0	0	0	33.33	0	0	0	0	0	0	33.33	0	33.33
196900	433.3	1133	2967	3067	3667	0	8537	33.33	1067	1433	33.33	0	0	0	0	0	0	0	0	0	0	0	33.33	33.33	0	0	0	0	0	33.33	0	0
202900	133.3	1533	4234	3301	3167	33.33	7637	0	766.7	1367	0	0	0	0	33.33	0	0	0	0	0	0	0	0	0	0	0	0	0	0	33.33	0	0
195800	33.33	1167	3201	2967	2967	0	8137	0	1000	1600	0	0	0	0	0	0	0	0	0	0	0	0	0	0	0	0	0	0	0	0	0	0
195900	33.33	1000	4635	3401	4001	0	7036	100	733.4	1100	0	0	0	0	0	0	0	0	0	0	0	0	0	0	0	0	0	0	0	0	0	0
199000	0	2000	4101	3634	3867	66.67	7570	66.67	866.7	1300	33.33	33.33	0	0	33.33	0	0	0	0	0	0	0	0	66.67	0	0	0	0	0	33.33	0	0
199000	100	1133	3434	3467	3934	33.33	7637	66.67	933.4	1600	0	0	0	33.33	0	0	0	0	0	0	0	0	33.33	0	0	0	0	0	0	0	0	0
197000	233.3	1333	3101	2900	3334	0	7837	133.3	933.4	1367	0	0	0	0	0	0	0	0	0	0	0	0	0	0	0	0	0	0	0	133.3	0	0
199500	133.3	1733	3634	2700	3701	33.33	9638	100	1000	1333	66.67	0	0	33.33	0	0	0	0	0	0	0	0	33.33	0	0	0	33.33	0	0	100	0	0
199500	33.33	1333	3901	3234	3701	100	8304	33.33	1200	1800	66.67	0	0	0	0	0	0	0	0	0	0	0	0	0	0	0	0	0	0	0	0	0
201400	200	39620	3434	2834	3367	300	13110	66.67	966.7	1934	400	33.33	0	0	33.33	0	33.33	0	0	0	0	0	0	0	0	0	33.33	0	0	33.33	0	0
206000	9138	42930	7270	2634	7270	3401	194200	233.3	666.7	1367	1733	1233	33.33	33.33	733.4	0	133.3	66.67	0	66.67	66.67	166.7	66.67	100	33.33	100	66.67	33.33	0	66.67	0	0
340100	205600	340200	36210	3701	27310	26910	1197000	600	933.4	1400	11340	6469	233.3	800	2034	200	600	166.7	133.3	400	200	433.3	466.7	133.3	233.3	166.7	200	233.3	33.33	233.3	66.67	33.33
639000	652200	1119000	114300	3167	86610	95840	3753000	2267	1367	1834	27270	19720	366.7	1700	4701	1233	1200	233.3	533.3	466.7	600	1033	633.4	666.7	300	433.3	233.3	666.7	66.67	233.3	133.3	33.33
1022000	1083000	1744000	129800	4101	124900	141300	5315000	2367	1433	1800	38880	25970	400	1700	7236	1533	1433	400	300	500	600	1200	833.4	1000	233.3	700	366.7	600	133.3	66.67	100	0
1106000	1317000	2124000	137300	3034	148800	158800	5806000	2800	1233	1867	46280	28380	600	2167	6869	1934	1367	333.3	600	566.7	800	1700	833.4	700	400	666.7	433.3	533.3	166.7	266.7	66.67	33.33
1161000	1548000	2682000	153200	4001	167700	163700	5944000	2600	700	1767	46320	27370	333.3	1967	6002	1233	1567	433.3	633.4	833.4	600	1333	1133	1167	500	333.3	366.7	733.4	33.33	133.3	0	66.67
1233000	1573000	2742000	171000	3534	183000	170300	5735000	2534	1300	2000	49470	25800	233.3	1667	4835	1000	1567	466.7	333.3	566.7	866.7	1300	1133	700	466.7	400	333.3	700	0	166.7	33.33	0
1368000	1646000	2667000	174100	3334	180300	160500	5492000	2700	1200	1867	50510	22960	333.3	1200	4768	1367	1067	300	733.4	300	1033	1067	833.4	966.7	500	500	433.3	500	66.67	233.3	66.67	33.33
1397000	1659000	2959000	166600	3201	183200	157300	5711000	2534	966.7	1700	51910	23230	300	1700	5702	1333	1400	233.3	700	333.3	633.4	733.4	866.7	900	466.7	433.3	533.3	633.4	33.33	100	33.33	33.33
1425000	1660000	2749000	158700	3034	181300	190800	6509000	3734	966.7	1900	47960	27340	533.3	2034	6869	1267	1167	633.4	433.3	200	666.7	1700	1033	1133	233.3	600	200	866.7	200	300	100	66.67
1450000	1629000	2825000	166800	3301	166700	202100	7381000	4234	933.4	2634	51810	37240	766.7	2767	10240	2567	1800	500	700	833.4	800	1567	1033	1333	500	666.7	500	1067	300	200	200	66.67
1320000	1644000	2693000	203000	3901	172000	260600	9251000	5468	700	3567	52150	50840	700	3867	12610	2834	2267	566.7	866.7	1233	1000	1767	1333	1167	800	500	500	1000	33.33	766.7	100	0
1400000	1478000	2487000	188100	3801	153600	271500	9318000	6536	1267	4601	49870	49430	866.7	4468	12510	3067	2100	766.7	933.4	866.7	866.7	1567	1867	1500	566.7	1133	733.4	500	66.67	333.3	133.3	0
1444000	1287000	2586000	173100	3634	148700	245000	9098000	6569	1000	3334	48730	45510	600	4601	13140	2367	2500	533.3	666.7	700	833.4	1500	866.7	1167	600	800	766.7	900	33.33	200	133.3	33.33
1421000	1309000	2707000	178200	4168	144300	215800	8309000	5735	1200	2700	47930	39050	1000	3667	11670	2200	2534	566.7	500	833.4	933.4	1567	1300	1867	833.4	766.7	366.7	800	133.3	233.3	66.67	66.67
1584000	1358000	2789000	195000	3534	166400	223800	8433000	6402	1033	2967	57380	37240	700	3234	10440	2234	1867	666.7	866.7	666.7	733.4	1300	1400	1100	633.4	366.7	366.7	666.7	133.3	400	66.67	66.67
1549000	1392000	2891000	180700	3934	159600	224900	8456000	5568	1367	2034	55440	35130	700	2600	11070	2067	1733	733.4	700	900	1000	2000	833.4	1267	666.7	466.7	400	800	366.7	266.7	33.33	66.67
1302000	1355000	2684000	175000	3801	159500	212400	7778000	4968	1067	2667	54760	31250	633.4	2834	8504	1934	1600	400	666.7	733.4	633.4	866.7	1133	1167	433.3	700	600	800	33.33	300	0	0
1423000	1387000	2695000	176400	3567	165700	198000	8526000	5268	1033	3301	54730	29850	533.3	2934	8771	1467	1600	300	500	633.4	666.7	966.7	1300	933.4	266.7	633.4	466.7	733.4	100	166.7	133.3	33.33
1361000	1514000	2737000	192300	3834	167100	194600	8426000	4968	1100	2234	53320	29180	900	2300	6936	1533	1133	700	600	566.7	700	1000	1033	1100	433.3	733.4	400	366.7	66.67	166.7	33.33	33.33
1352000	1441000	2705000	177000	3767	170600	176400	7872000	4635	1033	2500	58290	30790	600	2467	8137	1700	1400	533.3	866.7	566.7	833.4	1533	966.7	1000	366.7	533.3	300	633.4	100	300	133.3	0
1458000	1498000	2745000	193900	3401	162200	181100	8023000	3968	1100	2067	55870	29110	733.4	2234	7436	1700	1333	566.7	633.4	666.7	700	966.7	1367	966.7	366.7	666.7	400	366.7	66.67	166.7	0	0
1417000	1461000	2878000	176700	3667	163700	182600	7515000	3867	933.4	2000	56510	30280	466.7	2667	6936	1033	1633	533.3	633.4	733.4	700	800	1367	433.3	466.7	600	333.3	800	166.7	100	33.33	0
1348000	1557000	2907000	162500	3401	165200	176700	7076000	3634	900	2000	58990	29680	400	1967	6903	1600	1567	666.7	800	733.4	966.7	1200	700	1067	200	366.7	333.3	366.7	66.67	300	33.33	0
1284000	1488000	2727000	170700	4134	159000	166700	6617000	3867	933.4	2000	51950	29480	566.7	1934	7403	1400	1233	466.7	833.4	433.3	800	1167	766.7	1167	566.7	700	333.3	633.4	100	100	0	0
1344000	1402000	2717000	149200	4201	154300	178600	6684000	3134	900	1667	52450	28950	600	2100	7737	1267	1533	366.7	600	666.7	1000	933.4	1133	900	666.7	800	433.3	733.4	33.33	166.7	66.67	33.33
1304000	1397000	2558000	152600	3601	154700	165600	6185000	3801	800	2100	53720	26840	733.4	1900	5602	1033	1167	366.7	733.4	833.4	700	700	1033	800	200	600	266.7	566.7	66.67	133.3	0	33.33
1207000	1345000	2580000	156900	3901	154900	159900	5924000	3134	1100	1667	48330	24570	600	1867	6402	900	1267	300	633.4	500	600	1367	1000	766.7	233.3	366.7	400	500	66.67	300	133.3	0
1203000	1329000	2355000	143500	4201	144300	162400	5924000	3534	933.4	1600	47860	27240	566.7	1500	6502	1267	1600	200	500	566.7	600	833.4	833.4	1000	366.7	466.7	400	500	33.33	233.3	66.67	0
1222000	1358000	2352000	158200	3334	151000	167000	6056000	3267	1167	1500	53090	26400	466.7	1633	5535	1500	1834	566.7	500	566.7	566.7	1200	966.7	800	66.67	900	333.3	533.3	33.33	200	100	0
1259000	1368000	2497000	156900	3034	157600	181800	6141000	4501	1200	1934	49000	26270	433.3	2300	6936	1100	1667	300	733.4	700	1000	1000	1133	766.7	433.3	500	366.7	566.7	100	266.7	100	33.33
1318000	1256000	2499000	160700	3101	150200	182600	6444000	3367	1067	2300	51910	28750	600	2067	7837	1533	1333	466.7	666.7	533.3	700	1400	933.4	1000	400	766.7	366.7	466.7	100	200	33.33	0
1142000	1217000	2354000	149200	3134	134500	180100	5981000	3634	933.4	2500	42530	31590	533.3	2867	9305	1500	1567	500	600	366.7	866.7	633.4	900	733.4	300	500	533.3	466.7	100	233.3	33.33	66.67
1460000	1229000	2372000	146500	3434	136000	170900	6291000	3534	1233	2467	47260	30920	966.7	2500	8971	1800	1800	400	466.7	633.4	1033	1333	900	1300	366.7	566.7	466.7	533.3	100	233.3	0	33.33
1173000	1487000	2522000	157100	3201	155300	186400	6505000	3867	1033	2500	51880	29720	500	2934	9004	1800	1900	533.3	333.3	766.7	500	1467	966.7	1467	466.7	533.3	466.7	333.3	66.67	100	0	0
1217000	1423000	2490000	161500	3767	145900	187500	6211000	3701	800	2667	51010	29080	666.7	2200	7737	1533	1433	433.3	366.7	566.7	633.4	1000	1000	866.7	566.7	866.7	466.7	700	133.3	233.3	33.33	33.33
1209000	1310000	2533000	151400	3601	149600	168300	6471000	3167	1433	2234	46490	29050	766.7	2434	8070	1733	1267	500	600	933.4	900	1233	566.7	933.4	566.7	733.4	266.7	466.7	33.33	266.7	33.33	0
1216000	1256000	2274000	163100	4468	142700	167900	5857000	3434	1000	1767	45110	28010	533.3	2500	7036	1733	1333	566.7	533.3	633.4	533.3	1200	1033	866.7	366.7	633.4	233.3	700	66.67	200	33.33	66.67
1219000	1147000	2550000	152100	3767	134900	164700	5792000	2700	966.7	1733	53460	26340	633.4	2500	6969	1767	1667	533.3	633.4	466.7	666.7	1200	700	666.7	433.3	566.7	33.33	533.3	66.67	166.7	0	0
1539000	1117000	2369000	153100	3567	139100	153300	5895000	3167	900	1934	45210	26910	466.7	1967	7103	2300	1600	566.7	500	533.3	900	1300	900	733.4	566.7	366.7	333.3	466.7	133.3	100	66.67	0
1308000	1105000	2514000	140600	3567	140900	154300	5451000	2867	1467	1834	48190	25200	533.3	2034	7370	1533	1600	466.7	633.4	533.3	700	933.4	966.7	933.4	500	433.3	433.3	333.3	166.7	33.33	66.67	0
1245000	1195000	2466000	155200	3867	141500	157900	5967000	3101	1500	2167	46590	26400	400	2934	7003	1333	1333	300	500	700	766.7	1167	666.7	700	566.7	500	433.3	400	0	233.3	33.33	0
1260000	1228000	2536000	140600	3534	121000	160100	6463000	3834	1067	2300	46380	26370	600	2567	6235	1733	866.7	466.7	266.7	500	500	666.7	466.7	866.7	533.3	433.3	333.3	233.3	33.33	66.67	0	0
1366000	1355000	2178000	142800	3834	126100	166900	6394000	3767	833.4	1900	43770	23700	566.7	2567	6903	1233	1567	433.3	466.7	566.7	566.7	1000	966.7	833.4	333.3	366.7	266.7	266.7	166.7	166.7	100	33.33
1220000	1502000	2168000	135100	3667	107900	165200	6908000	4968	1133	1967	43070	25400	300	2267	7570	1567	1900	400	233.3	466.7	700	1000	800	866.7	233.3	366.7	366.7	500	200	166.7	66.67	0
1332000	1475000	2161000	148200	3167	106700	186100	7346000	4168	1033	2634	42060	31220	633.4	2934	9205	2167	1567	400	800	700	700	1067	1200	1233	600	833.4	533.3	800	33.33	300	33.33	0
1551000	1333000	2287000	149300	4134	109700	207000	7716000	5502	1133	2400	44310	34160	700	2900	9772	1533	1967	566.7	1000	500	733.4	1333	1267	1200	366.7	800	266.7	800	133.3	333.3	133.3	0
1239000	1189000	2071000	144600	3201	118100	206900	7319000	4434	866.7	2334	44370	32690	900	4134	10310	1867	2100	666.7	700	733.4	800	1400	1067	1033	466.7	800	433.3	533.3	200	200	133.3	66.67
1251000	1163000	2188000	143500	3901	118400	210700	6696000	4635	1200	2134	46920	36710	1167	2967	9305	2134	1633	366.7	733.4	600	733.4	1167	1000	1000	500	866.7	333.3	900	300	366.7	100	33.33
1447000	1126000	2301000	135300	3367	121400	184300	6725000	4134	1200	2200	45350	35500	633.4	3234	8571	1967	1967	400	200	433.3	800	1100	1000	1100	366.7	433.3	600	500	100	233.3	100	133.3
1531000	1108000	2183000	142200	3367	117600	169200	6119000	4134	1133	2234	42370	30720	400	2400	8404	1633	1433	500	466.7	500	800	733.4	1000	900	466.7	566.7	366.7	533.3	100	200	133.3	0
1509000	1113000	1936000	133100	3401	124700	155300	5975000	3734	1067	2100	40820	28440	600	2500	8137	1533	1600	500	400	466.7	666.7	1067	933.4	900	333.3	600	466.7	633.4	133.3	166.7	66.67	100
1050000	1067000	1974000	125800	3801	125600	154800	6181000	3234	1167	1867	41530	26510	633.4	2400	6336	1400	1467	366.7	566.7	566.7	866.7	1100	566.7	1433	500	666.7	233.3	666.7	166.7	333.3	0	0
1060000	1142000	2018000	135000	3267	125700	157700	5566000	3801	1033	1100	37080	24370	500	2200	6803	1000	1800	366.7	633.4	433.3	733.4	1267	700	966.7	233.3	366.7	300	433.3	0	300	0	33.33
1342000	1034000	2147000	135200	4635	126100	142200	5425000	3667	1133	1267	42730	23460	366.7	1967	5869	1167	1133	233.3	566.7	333.3	566.7	666.7	966.7	533.3	200	666.7	333.3	466.7	66.67	266.7	0	0
1114000	939500	2729000	126600	3567	129500	128500	4497000	2934	966.7	1967	48160	20360	466.7	1700	5635	1067	900	500	433.3	666.7	533.3	966.7	533.3	533.3	500	700	266.7	333.3	66.67	166.7	33.33	0
1318000	819300	3104000	134300	3467	137700	107800	4062000	2434	966.7	1200	57250	16210	500	1567	4735	666.7	966.7	333.3	433.3	200	666.7	433.3	466.7	466.7	133.3	266.7	300	133.3	33.33	100	33.33	33.33
1313000	689700	3710000	151600	4434	144600	86340	3182000	1834	933.4	1600	62380	12240	433.3	1200	3767	566.7	700	166.7	600	400	133.3	600	600	166.7	100	266.7	266.7	333.3	66.67	166.7	100	33.33
1362000	527700	3837000	133500	3334	131600	71750	2428000	1267	1100	1467	57580	9271	200	766.7	3067	300	566.7	100	333.3	66.67	200	366.7	166.7	433.3	33.33	133.3	100	200	33.33	33.33	0	0
1217000	415500	3757000	128300	3834	143500	56040	1893000	833.4	833.4	1800	60230	6836	233.3	500	2000	266.7	433.3	0	366.7	266.7	100	233.3	166.7	200	233.3	66.67	100	100	33.33	200	0	0
1410000	286300	3856000	138900	3934	134000	40320	1356000	466.7	1100	1733	60900	5535	33.33	566.7	1700	266.7	400	66.67	100	66.67	333.3	166.7	166.7	233.3	33.33	133.3	0	100	33.33	200	33.33	0
1180000	265400	3554000	131700	3634	128300	33290	1183000	633.4	1533	1500	63250	5268	300	366.7	1467	166.7	166.7	66.67	200	100	133.3	133.3	200	200	66.67	166.7	200	66.67	0	133.3	33.33	33.33
1374000	388600	3922000	145900	3267	149000	47620	1750000	966.7	1300	1934	75610	7436	366.7	800	1600	433.3	300	66.67	266.7	233.3	100	466.7	166.7	266.7	66.67	166.7	66.67	233.3	0	133.3	0	0
1439000	472300	3968000	143600	3601	152500	57350	2175000	1067	866.7	1867	64600	8504	266.7	833.4	2534	433.3	400	0	200	233.3	366.7	333.3	233.3	200	133.3	133.3	66.67	300	0	233.3	0	0
1164000	486800	3464000	142700	2734	137900	58250	2238000	1200	900	2200	59290	8771	533.3	466.7	2167	433.3	400	100	200	66.67	133.3	433.3	166.7	500	133.3	100	166.7	133.3	100	133.3	33.33	66.67
1301000	593400	3560000	136300	3667	140700	72890	2721000	1400	1200	2000	60230	12070	466.7	766.7	3067	633.4	500	133.3	200	233.3	400	366.7	400	233.3	233.3	233.3	233.3	433.3	33.33	33.33	0	0
1195000	721400	3225000	142000	3134	137100	86410	3218000	2034	1167	1834	52580	13580	333.3	1000	3667	666.7	633.4	133.3	466.7	200	433.3	500	266.7	433.3	200	233.3	133.3	400	0	66.67	33.33	0
1218000	813200	2916000	139900	3801	134700	105100	3681000	2067	1167	1867	55870	14810	466.7	1033	4301	1100	900	133.3	366.7	266.7	466.7	700	466.7	766.7	233.3	366.7	200	433.3	100	66.67	0	0
1274000	1079000	3115000	148100	4134	150900	140000	4979000	3267	1067	1667	57480	20720	600	1667	4935	1233	1067	233.3	433.3	433.3	900	933.4	600	866.7	266.7	333.3	266.7	566.7	33.33	166.7	0	0
1258000	1144000	3034000	158400	3667	148900	153200	5399000	3000	1000	1767	54090	22590	533.3	1433	5502	1167	1133	400	433.3	400	666.7	833.4	966.7	633.4	433.3	633.4	300	333.3	100	133.3	0	66.67
1229000	1366000	3192000	154900	3901	152300	169200	5979000	3601	966.7	1567	55770	24870	366.7	2067	5668	1333	1100	400	633.4	600	400	866.7	733.4	966.7	233.3	366.7	433.3	500	100	100	33.33	0
1317000	1343000	3106000	159100	3701	164600	180500	6419000	3501	1067	1867	60330	26170	500	1834	7336	1400	1233	266.7	500	933.4	566.7	1533	1100	933.4	366.7	500	333.3	366.7	100	166.7	66.67	0
1376000	1469000	2910000	169200	3401	158000	186100	6436000	3801	1167	1733	58690	26470	400	2267	6836	1400	1367	400	600	733.4	900	1267	1067	666.7	633.4	600	400	566.7	33.33	266.7	100	0
1285000	1512000	3012000	176500	4501	176100	211400	6693000	4534	933.4	2034	60570	31290	533.3	2767	7303	1834	1800	533.3	400	600	900	1233	1167	1067	500	433.3	400	700	133.3	200	0	100
1468000	1550000	3011000	168400	4034	176000	211200	6935000	4168	1000	2567	57010	31620	533.3	2134	8104	1700	2000	833.4	700	633.4	933.4	1667	1100	1100	366.7	333.3	466.7	1000	33.33	133.3	33.33	0
1249000	1361000	2839000	179600	4001	169300	217100	7270000	4568	1033	2200	56640	36170	566.7	2867	9805	1867	2034	666.7	766.7	1067	966.7	1800	1033	1167	300	766.7	466.7	933.4	66.67	266.7	166.7	0
1578000	1412000	3165000	197500	3701	175800	257200	8446000	5135	1000	2467	62010	43340	766.7	3867	11610	2300	2267	666.7	800	500	833.4	1267	1600	833.4	500	1000	433.3	600	233.3	266.7	66.67	100
1478000	1259000	3024000	186400	3701	171400	257200	8226000	4668	900	2467	60870	40290	500	3968	10970	2300	2167	600	633.4	900	1133	1800	1300	1000	166.7	533.3	466.7	766.7	200	200	66.67	0
1451000	1259000	2989000	178700	3834	165400	246800	7596000	4935	1133	2700	66240	44310	866.7	3801	10940	2267	1900	733.4	800	766.7	1000	1467	1133	1500	666.7	833.4	466.7	900	333.3	300	66.67	100
1576000	1274000	3435000	209200	4134	188800	226900	7568000	4201	1000	2434	67750	39990	966.7	3167	10610	2134	1967	700	833.4	633.4	1000	1233	1133	900	533.3	533.3	433.3	533.3	166.7	66.67	66.67	33.33
1788000	1241000	3586000	204200	3968	181200	217900	7335000	4735	866.7	2434	67010	37140	633.4	3534	11110	2034	2234	733.4	800	966.7	1033	1400	1133	933.4	533.3	966.7	366.7	800	33.33	166.7	0	100
1500000	1033000	3318000	174800	4134	155900	200400	7094000	3634	1467	2734	57850	31690	900	3167	9071	1800	1767	633.4	666.7	666.7	433.3	900	1000	800	600	633.4	433.3	466.7	66.67	266.7	33.33	66.67
1533000	813400	3073000	156500	4601	145600	173600	5936000	3934	1567	3734	59530	27640	766.7	2600	7470	1067	1633	633.4	466.7	600	600	1367	866.7	1200	366.7	400	366.7	500	66.67	100	33.33	33.33
1544000	861500	3152000	161000	4034	148800	187900	7064000	4668	1233	2967	62920	30280	766.7	3067	9805	1500	1600	700	800	600	1133	1467	1133	1033	566.7	500	400	566.7	166.7	300	100	0
1581000	951300	3190000	179500	3968	147200	192800	7470000	4901	833.4	3467	59060	33630	766.7	2500	9572	1767	1834	366.7	833.4	866.7	500	1333	1133	1067	433.3	766.7	466.7	733.4	100	300	66.67	66.67
1509000	924500	3066000	176200	3401	144400	193100	7799000	6069	1200	2934	61210	31660	466.7	3034	9305	2334	1934	800	500	933.4	600	1400	1200	1167	500	866.7	400	600	66.67	400	66.67	0
1526000	1072000	3002000	180300	3867	147600	201400	8457000	5735	833.4	3901	61040	32490	333.3	2900	9772	1733	1834	366.7	733.4	733.4	900	1533	933.4	766.7	433.3	633.4	266.7	533.3	133.3	233.3	66.67	66.67
1595000	1176000	3115000	173800	4001	154400	211000	8890000	6202	1000	3601	59930	32460	466.7	2634	9205	1967	1533	433.3	500	600	800	1067	1067	1200	433.3	733.4	200	400	133.3	166.7	133.3	66.67
1444000	1236000	2945000	175600	3701	153900	219700	8304000	6469	1133	3201	60230	35870	533.3	2300	8571	1800	1500	633.4	633.4	966.7	1000	1467	1067	1167	466.7	600	466.7	766.7	133.3	66.67	33.33	33.33
1585000	1293000	3119000	200800	3734	160900	230600	8666000	6336	966.7	2800	57650	34160	700	3367	9772	2367	1567	266.7	366.7	933.4	833.4	1600	1533	800	633.4	766.7	700	466.7	133.3	200	66.67	33.33
1681000	1382000	2978000	191200	3701	163000	250800	9489000	6169	733.4	3301	64090	37480	633.4	3067	10910	2067	2134	366.7	533.3	733.4	966.7	1433	1100	1067	500	566.7	433.3	833.4	166.7	333.3	0	33.33
1464000	1408000	2960000	181800	3867	171400	245500	9312000	6636	1233	2734	59930	40220	966.7	2734	11070	2100	1967	433.3	866.7	900	933.4	1500	1433	900	500	800	366.7	733.4	66.67	233.3	0	0
1663000	1498000	2955000	180100	3534	150700	283100	10050000	6636	1200	3101	57920	38350	1167	3467	10370	2200	2400	733.4	533.3	600	900	1033	733.4	1267	466.7	633.4	533.3	866.7	66.67	433.3	66.67	33.33
1523000	1528000	3086000	194500	4334	146600	264800	10950000	6035	966.7	2767	63150	42800	800	4034	11940	2234	1867	600	866.7	1067	1067	2400	1467	1233	633.4	800	566.7	966.7	200	366.7	133.3	133.3
1629000	1705000	3156000	198500	3801	159300	287700	10730000	6169	1500	2834	59230	44410	666.7	3667	12980	2434	2900	833.4	666.7	866.7	1067	1400	1700	1200	466.7	833.4	566.7	866.7	100	200	66.67	33.33
1656000	1730000	3175000	194400	4368	175500	294200	11120000	7470	1233	2500	61680	44140	900	3434	13580	2800	2900	600	933.4	700	1100	1567	1167	1367	700	766.7	533.3	1033	233.3	366.7	133.3	0
1607000	1665000	3047000	203600	4401	169700	272700	10170000	6402	1167	2200	61440	42630	866.7	3567	10470	2534	1967	600	533.3	933.4	1200	2067	1500	1133	333.3	933.4	400	833.4	166.7	366.7	0	100
1702000	1893000	3254000	208600	3267	170900	282600	9687000	5768	933.4	2100	66340	36610	933.4	3567	11270	1633	1767	433.3	900	900	1000	1867	1100	1167	500	800	766.7	600	133.3	100	66.67	33.33
1585000	1827000	3222000	196700	4268	184500	257400	9178000	6235	1133	2167	66070	42300	600	2867	11610	2134	2634	466.7	933.4	900	1367	1400	1200	1000	500	533.3	533.3	866.7	233.3	166.7	100	0
1463000	1775000	2964000	182100	3801	180100	242000	8542000	4768	1133	2700	57880	38650	766.7	3534	10240	1767	1967	466.7	800	1000	1133	1467	1300	1500	533.3	533.3	566.7	1033	66.67	166.7	33.33	33.33
1446000	1872000	3057000	193700	3767	193500	236500	8655000	3901	1100	2100	54090	37240	566.7	2467	9939	1834	1900	500	1000	600	1200	1900	1600	1167	433.3	533.3	366.7	766.7	133.3	266.7	66.67	33.33
1303000	1732000	2982000	173800	3701	185800	201900	7559000	4168	1567	2134	62410	36710	600	3067	10310	1834	1567	266.7	700	733.4	833.4	1400	1200	1133	200	500	366.7	933.4	100	200	66.67	33.33
1391000	1401000	3279000	172100	3634	163200	181200	6462000	2967	1067	1834	57450	29820	700	2134	8537	2034	1500	500	633.4	566.7	766.7	1367	1167	1300	666.7	633.4	233.3	800	66.67	66.67	33.33	66.67
1335000	1110000	3699000	173900	3767	174000	157100	5383000	2667	1067	1633	63350	27410	600	2034	7303	1133	1300	366.7	466.7	700	433.3	766.7	700	900	333.3	600	300	466.7	133.3	133.3	100	0
1410000	921200	4332000	170100	3801	180300	108000	4003000	2167	1333	1934	76390	17980	700	1767	4201	700	933.4	266.7	533.3	266.7	533.3	966.7	400	566.7	300	166.7	100	466.7	0	133.3	33.33	0
1621000	682300	4679000	180000	4101	185300	85630	3184000	1834	1200	2034	72290	13080	366.7	933.4	3101	833.4	600	166.7	166.7	433.3	233.3	433.3	433.3	333.3	166.7	133.3	133.3	333.3	0	33.33	66.67	0
1435000	779100	4246000	155800	3901	155200	60000	2608000	1867	1100	2200	64260	10340	200	1200	3234	500	500	33.33	233.3	33.33	366.7	233.3	266.7	233.3	66.67	200	233.3	133.3	0	200	33.33	0
1116000	1475000	3855000	151700	3567	127200	39520	3373000	2200	1033	2200	58550	6436	366.7	500	1767	533.3	466.7	66.67	100	133.3	400	333.3	133.3	200	66.67	66.67	100	33.33	33.33	133.3	0	0
1148000	3431000	3806000	186400	3667	126900	33260	6077000	3267	1200	3501	58120	5768	200	400	1233	300	366.7	100	133.3	100	66.67	266.7	100	200	66.67	66.67	33.33	166.7	33.33	133.3	0	0
1164000	3692000	3083000	154300	4268	109900	28710	5219000	3167	1167	3901	51980	6602	100	466.7	1700	400	333.3	133.3	266.7	33.33	200	266.7	300	266.7	166.7	133.3	166.7	133.3	33.33	66.67	0	33.33
1225000	2217000	3391000	155800	3301	131900	64130	3826000	2234	1067	3901	51880	10770	333.3	966.7	3234	966.7	533.3	266.7	266.7	333.3	366.7	633.4	366.7	766.7	66.67	366.7	166.7	366.7	0	266.7	0	0
1502000	1338000	3882000	180700	4001	156700	118000	4717000	3767	1167	4501	65330	19550	800	2067	8004	1133	1267	300	533.3	300	666.7	733.4	800	900	133.3	400	133.3	333.3	33.33	466.7	0	0
1701000	1102000	3941000	196300	3968	178600	174500	5940000	4668	1167	2967	79310	30820	1067	4068	11470	2834	2200	766.7	933.4	800	866.7	1767	1200	866.7	400	500	366.7	500	100	1033	66.67	100
2637000	1083000	4985000	239000	4368	208200	185500	7087000	5001	966.7	3934	121400	28680	4601	3701	12410	2200	1867	600	833.4	466.7	800	1267	900	1000	433.3	1000	600	533.3	33.33	1067	33.33	133.3
2087000	860600	4095000	189600	4768	159500	127600	5607000	4768	1167	3467	91220	24430	4068	1867	5768	900	1100	233.3	300	266.7	233.3	333.3	466.7	700	133.3	433.3	133.3	333.3	0	300	33.33	100
1164000	472700	2484000	118800	4334	89840	53120	2438000	2534	933.4	3101	48500	14480	2067	833.4	3334	700	500	266.7	133.3	200	233.3	266.7	266.7	333.3	100	133.3	100	100	0	333.3	0	33.33
664200	337500	1480000	65540	3000	64900	42770	2370000	1934	933.4	2734	30220	10940	1333	633.4	3567	400	466.7	100	200	266.7	233.3	333.3	333.3	266.7	166.7	300	66.67	200	66.67	433.3	0	100
669800	337800	1205000	59830	3867	51280	49270	2253000	1934	900	3101	26810	14680	866.7	933.4	3601	633.4	466.7	200	400	266.7	300	333.3	300	300	133.3	133.3	66.67	200	0	400	33.33	33.33
652400	358200	1154000	72760	3567	53860	63590	2771000	2100	1300	2934	31520	19220	1167	1267	4234	866.7	833.4	433.3	300	333.3	433.3	466.7	900	700	133.3	400	100	466.7	0	366.7	66.67	33.33
1107000	1216000	2376000	162700	4368	142100	148400	6123000	3734	1000	2734	53690	32630	1267	2167	6436	1700	1033	533.3	533.3	666.7	633.4	1333	966.7	1300	566.7	633.4	700	566.7	66.67	1000	100	133.3
1678000	1649000	3025000	184000	3667	183000	193100	8154000	4134	1100	2700	67180	42130	1233	3301	9839	1967	1800	366.7	400	900	1167	1200	1200	1267	466.7	733.4	600	933.4	66.67	833.4	0	33.33
1624000	1717000	3215000	217600	4301	186200	213900	9072000	5535	1467	2967	69200	41930	1333	2800	10210	1733	1967	433.3	966.7	666.7	866.7	1233	1133	800	466.7	1033	433.3	933.4	133.3	700	33.33	66.67
1588000	1884000	3217000	209600	4134	210900	224400	9151000	5468	1200	2067	72860	35370	1133	3000	10010	1967	1867	466.7	566.7	733.4	900	1733	1400	1100	466.7	733.4	366.7	633.4	33.33	466.7	0	66.67
1652000	1932000	3336000	224500	3901	207300	211700	8911000	4434	1667	1733	62920	36640	900	2400	8971	1767	1767	466.7	700	933.4	966.7	1267	1267	1267	466.7	700	600	633.4	33.33	366.7	66.67	33.33
1939000	1806000	3515000	209300	4334	205400	205500	8574000	4501	933.4	2000	70370	39620	633.4	2600	9472	1934	2134	366.7	666.7	833.4	766.7	1400	1233	966.7	600	1067	600	700	66.67	500	33.33	100
1655000	1909000	3580000	221200	3934	209700	233600	9047000	5335	1167	2100	72960	38410	866.7	3434	9739	1934	2134	733.4	800	600	833.4	1467	1633	1500	433.3	833.4	500	600	200	266.7	133.3	0
1744000	1914000	3630000	214100	4001	207800	270800	9594000	5735	1200	1700	66310	44270	1033	3834	11310	2334	1700	666.7	666.7	1367	1100	2134	1800	1600	533.3	866.7	700	1033	133.3	266.7	100	33.33
1653000	1862000	3237000	218600	3968	198000	254700	8898000	5702	1033	2067	67680	43670	733.4	3367	11210	2067	2367	800	866.7	1100	966.7	1333	1533	1934	866.7	566.7	666.7	833.4	100	500	100	33.33
1626000	1814000	3484000	217500	3334	199500	232700	8234000	4801	1133	2134	60200	38820	533.3	3367	10310	1967	2300	766.7	1000	666.7	1133	1867	1267	1367	266.7	600	500	533.3	100	333.3	66.67	100
1622000	1750000	3348000	193000	3501	196300	234200	8603000	5268	1033	2167	67520	40560	533.3	3134	10210	2267	1533	666.7	800	866.7	700	1967	1133	833.4	533.3	633.4	333.3	700	100	300	100	66.67
1542000	1747000	3086000	195300	4034	190200	216900	7925000	5268	1067	1700	64430	38080	600	2700	9438	2667	1667	566.7	633.4	1000	733.4	1633	1133	1400	633.4	533.3	333.3	666.7	166.7	100	66.67	0
1711000	1596000	3136000	194000	3534	176400	222100	8175000	5035	1000	2167	61540	41430	700	3467	10770	1900	1733	633.4	800	800	633.4	1700	1167	1400	533.3	766.7	666.7	633.4	100	333.3	66.67	66.67
1445000	1612000	3026000	200900	3534	177400	232300	8575000	5835	733.4	2034	51880	37580	500	4101	9939	2334	1700	633.4	600	700	1000	1200	1233	1100	600	733.4	400	700	66.67	466.7	100	0
1398000	1442000	2998000	180100	4134	160400	236600	8722000	4668	966.7	2767	55970	38210	866.7	2867	9205	2200	2100	500	933.4	666.7	800	1733	1267	1467	566.7	800	500	666.7	66.67	300	33.33	33.33
1408000	1635000	3125000	193500	3234	185900	240400	8868000	5035	1033	2600	61170	39490	733.4	2700	9739	1767	1767	733.4	766.7	733.4	1267	1367	1500	1167	500	933.4	700	600	66.67	366.7	166.7	0
1740000	1523000	3051000	198500	3934	168800	245600	9901000	6336	866.7	2434	57180	42400	700	3201	10340	2467	2034	500	500	833.4	800	1433	1200	1133	500	766.7	500	1033	200	300	0	66.67
1586000	1248000	2558000	182100	3801	149000	243800	9860000	6903	766.7	3501	56840	37910	900	4168	12580	2634	2034	666.7	933.4	800	1033	1767	1633	833.4	466.7	500	433.3	666.7	233.3	500	133.3	66.67
1657000	1328000	2868000	209400	4334	151200	268500	10440000	7703	1300	3334	52180	43670	1067	4368	12240	2667	1800	600	733.4	766.7	966.7	1100	1533	1600	633.4	833.4	633.4	533.3	100	200	100	33.33
1361000	1258000	2638000	161700	4168	144400	231700	9345000	5635	833.4	3767	50370	37510	633.4	3634	11010	2234	1300	700	500	1233	766.7	1333	1167	1267	433.3	966.7	766.7	833.4	100	433.3	66.67	0
1580000	1517000	3123000	184800	3601	173200	253300	9660000	5969	1133	3267	56070	36140	566.7	3501	10010	2134	2100	800	766.7	566.7	800	1467	1400	1233	500	1000	500	733.4	66.67	300	0	0
2475000	1362000	2678000	182200	3968	167000	211700	8036000	5435	1200	2834	48360	37110	700	3234	10310	2600	1667	700	966.7	1000	1100	1567	1500	1033	333.3	1267	333.3	1067	100	166.7	33.33	33.33
1462000	1297000	2778000	166600	3401	153000	218500	8539000	4568	1267	2834	53020	40120	733.4	4068	12780	2167	2034	766.7	866.7	966.7	1167	1733	1400	1000	466.7	933.4	833.4	666.7	133.3	166.7	33.33	0
1378000	1272000	2569000	175500	3801	145100	202900	8482000	5201	866.7	2934	44070	33260	766.7	2934	9505	1867	1767	466.7	400	666.7	700	1467	1200	933.4	466.7	733.4	333.3	433.3	100	100	66.67	0
1473000	1032000	2464000	155700	3000	130200	174900	7135000	5268	1400	3334	43870	28310	600	2200	8270	1867	1433	433.3	733.4	633.4	700	900	966.7	800	533.3	666.7	600	666.7	100	300	33.33	33.33
1340000	1151000	2679000	163500	4168	143800	195500	8288000	5668	1100	3267	53420	38820	1033	3934	13840	2667	2367	466.7	600	1267	900	1500	1400	1300	966.7	866.7	566.7	1067	100	533.3	66.67	100
1774000	1172000	3068000	193800	3534	137700	230800	8567000	6002	933.4	3867	51080	43170	866.7	4568	13540	2500	2300	933.4	900	833.4	1133	1733	1200	1033	900	733.4	433.3	666.7	133.3	366.7	66.67	66.67
1542000	1246000	2947000	190200	4434	157500	220800	8681000	5035	1000	2900	52180	36470	666.7	2900	10440	1934	2134	400	800	700	600	1067	1467	1467	566.7	733.4	466.7	866.7	100	300	0	33.33
1614000	1452000	2672000	161100	3434	164300	202500	7752000	4101	1233	2500	50240	33630	800	2834	8104	1533	1200	666.7	766.7	800	833.4	1067	1367	1333	300	800	333.3	733.4	100	266.7	33.33	66.67
1245000	1464000	2621000	151800	3167	149100	185100	6699000	4568	933.4	2067	44270	28510	500	2400	9438	2000	1500	633.4	600	766.7	833.4	1500	1467	1433	466.7	466.7	300	633.4	166.7	300	100	0
1253000	1206000	2368000	178300	3367	147500	196100	7263000	4601	666.7	2400	45880	35300	866.7	2834	10240	2134	2434	600	733.4	700	1000	1633	1433	1233	433.3	866.7	300	633.4	233.3	300	33.33	33.33
1546000	1437000	2883000	200700	4368	172700	262200	8679000	6636	1067	2834	61740	42430	533.3	3667	12580	2300	2400	800	900	800	733.4	1167	1000	1167	566.7	1133	566.7	733.4	100	300	100	33.33
1511000	1138000	2744000	194800	3234	138800	265900	9422000	6736	1067	2367	50740	42900	800	4034	12910	2300	2134	733.4	866.7	533.3	1200	1567	1300	1267	500	866.7	566.7	966.7	133.3	533.3	100	66.67
1338000	942200	2235000	149900	3667	113400	224200	7613000	6235	1400	3467	45750	41860	700	4468	14980	3167	2067	400	566.7	900	833.4	1967	1400	1300	533.3	866.7	666.7	500	133.3	200	133.3	100
1288000	1029000	2552000	179600	3501	135600	260300	10180000	7937	1233	3034	48260	43740	1000	5001	15080	3134	2967	900	933.4	900	1100	1600	1467	1233	366.7	1067	600	966.7	266.7	400	133.3	66.67
1515000	1306000	2735000	182600	3567	154100	253100	8561000	6569	633.4	2467	49400	39720	833.4	4735	12010	2534	2334	866.7	733.4	1000	833.4	1167	1500	866.7	500	566.7	433.3	800	233.3	200	66.67	0
1277000	1347000	2556000	175900	3401	150700	226800	8020000	4868	900	2534	46920	36470	566.7	2667	9038	1700	2234	366.7	666.7	666.7	600	1433	766.7	1233	600	433.3	300	800	133.3	300	133.3	0
1304000	1367000	2620000	181300	3434	173000	237100	8174000	4268	1067	2000	49400	33060	466.7	2300	8838	1900	1600	733.4	666.7	633.4	1167	1667	966.7	1333	600	800	366.7	733.4	0	466.7	33.33	33.33
1161000	1200000	2406000	140100	4134	133400	179700	6449000	4301	933.4	1633	44070	35300	600	2767	10940	1834	1867	333.3	533.3	600	1033	1333	1133	1233	566.7	500	366.7	833.4	166.7	100	33.33	0
1395000	1277000	2467000	175900	3834	141800	203600	8232000	5435	1200	2500	52890	37380	766.7	3067	9438	1800	1567	400	666.7	633.4	500	1500	933.4	966.7	700	500	366.7	766.7	33.33	266.7	133.3	33.33
1312000	1328000	2434000	168700	4068	140900	207800	7584000	4568	1233	2467	41390	36410	766.7	3034	10310	2200	1934	600	500	833.4	733.4	1600	1333	1333	666.7	833.4	300	500	66.67	233.3	100	66.67
1316000	1282000	2203000	159100	3934	145800	199900	8385000	4334	900	2267	48660	29480	800	2167	6969	1600	2134	500	500	766.7	966.7	1233	1133	1300	600	466.7	700	733.4	166.7	200	33.33	0
1449000	1562000	2569000	185600	3601	175900	216200	7573000	5135	1367	2467	53990	32090	533.3	2500	8437	1967	1467	466.7	1000	600	833.4	1533	733.4	766.7	300	633.4	400	566.7	66.67	266.7	33.33	33.33
1659000	1256000	2222000	163600	3334	147100	192400	7217000	3467	1267	2000	40390	29310	333.3	2800	6903	2000	1467	200	766.7	700	933.4	1700	700	1133	466.7	833.4	366.7	633.4	66.67	200	233.3	66.67
1332000	1452000	2473000	163900	3367	168100	224100	8107000	4568	833.4	2834	51180	34630	666.7	2467	8571	2400	1800	366.7	700	666.7	766.7	1633	1333	1100	233.3	1033	433.3	533.3	33.33	200	0	33.33
1145000	1399000	2768000	150400	3167	146000	176900	6608000	3367	1067	2234	41260	24030	433.3	1733	5969	1067	1033	533.3	366.7	300	800	700	566.7	500	100	433.3	300	166.7	33.33	166.7	0	0
730700	694300	1081000	83380	3367	73190	92800	3075000	1600	1167	1900	18450	11710	266.7	1033	3067	800	733.4	200	266.7	133.3	233.3	166.7	533.3	200	33.33	100	66.67	233.3	0	66.67	0	0
581600	449600	730700	56010	3201	47690	58490	2273000	1133	1200	2167	13140	9071	166.7	700	1867	633.4	466.7	200	166.7	433.3	133.3	200	233.3	266.7	166.7	100	33.33	0	0	133.3	0	0
461500	375500	639200	41060	3034	46020	49900	1751000	1200	1000	1800	11970	7436	133.3	433.3	1667	366.7	333.3	200	100	333.3	266.7	300	133.3	100	133.3	233.3	0	200	0	33.33	0	0
416900	347600	538700	39620	3301	37950	46120	1581000	900	866.7	1667	10310	6636	166.7	733.4	1600	266.7	400	133.3	133.3	200	166.7	266.7	233.3	100	100	66.67	33.33	200	0	33.33	66.67	33.33
387700	277800	442600	31050	3201	31520	35940	1280000	800	700	2100	8304	5468	33.33	466.7	1500	533.3	200	66.67	133.3	0	100	133.3	33.33	200	166.7	200	33.33	100	33.33	33.33	0	0
340300	198000	366700	26770	3401	28080	28010	828200	666.7	900	1500	7536	4501	66.67	400	966.7	266.7	133.3	233.3	33.33	133.3	33.33	300	166.7	33.33	133.3	133.3	33.33	66.67	0	100	33.33	0
294700	150100	244000	19190	3334	20020	20860	660000	366.7	1033	1733	4401	2267	0	66.67	633.4	200	133.3	0	66.67	66.67	33.33	33.33	166.7	33.33	33.33	0	0	66.67	0	33.33	33.33	0
267500	93950	163600	14510	2767	14080	13110	435300	366.7	1400	1533	3034	1800	33.33	133.3	466.7	200	0	0	0	66.67	133.3	133.3	33.33	33.33	0	0	66.67	33.33	0	100	0	0
241400	70170	102800	10910	2900	9538	7903	287400	233.3	900	1233	2134	1233	33.33	233.3	233.3	33.33	33.33	0	133.3	0	0	66.67	0	33.33	0	66.67	0	0	33.33	33.33	0	0
228900	43640	68730	8471	2800	8237	7069	236800	200	1133	1467	1200	900	0	66.67	200	66.67	0	0	33.33	0	0	33.33	0	33.33	33.33	33.33	33.33	0	0	100	33.33	0
218700	34500	57180	6636	3434	6669	3734	149600	233.3	833.4	1700	1033	633.4	0	66.67	266.7	0	33.33	0	0	33.33	33.33	0	0	0	0	0	33.33	0	0	33.33	0	0
208200	20620	55470	6602	4434	5568	3267	116200	166.7	666.7	1700	500	500	0	100	100	0	33.33	0	0	0	0	0	33.33	0	33.33	33.33	0	0	0	66.67	0	0
213800	14780	27170	6536	2800	5302	2367	76890	200	900	1600	433.3	333.3	0	0	100	33.33	33.33	0	33.33	0	0	33.33	0	0	0	0	33.33	0	0	66.67	0	0
203700	8371	19690	4401	3534	4468	1100	60370	100	566.7	1733	233.3	566.7	0	0	33.33	0	100	0	0	0	0	0	33.33	0	0	0	33.33	0	0	0	0	0
199100	8137	14510	5168	3367	4368	1333	42570	166.7	1500	2267	100	266.7	0	0	33.33	0	0	0	0	0	0	0	0	0	0	0	0	0	0	0	0	0
207900	5735	9839	4301	2934	3934	700	33900	33.33	900	1667	133.3	133.3	0	0	66.67	0	33.33	0	0	0	0	0	0	0	0	0	0	0	0	33.33	0	0
202800	5235	10210	4201	2867	4534	566.7	33260	100	700	1700	133.3	33.33	0	33.33	33.33	33.33	0	0	0	0	33.33	0	0	0	0	0	0	0	0	33.33	66.67	0
203000	3034	9438	3701	3434	4034	300	25700	166.7	1167	2067	100	33.33	0	33.33	0	33.33	0	0	0	0	0	0	0	0	0	0	0	33.33	0	0	0	0
202400	2467	3601	3734	2767	4068	133.3	23030	0	1100	1767	100	133.3	0	0	0	0	0	0	0	0	0	0	0	0	0	0	0	0	0	33.33	0	0
201300	1834	5635	4735	3301	3834	500	19490	33.33	900	1767	33.33	66.67	0	0	0	33.33	0	0	0	0	0	0	0	0	0	0	0	0	0	0	0	0
200300	1800	5668	4234	2634	3901	433.3	15950	0	900	1600	33.33	100	0	0	33.33	33.33	0	0	0	0	66.67	0	0	0	0	0	0	0	0	33.33	0	0
201200	1467	3034	3734	3234	3467	233.3	12740	133.3	1133	1533	0	33.33	0	0	0	0	0	0	0	0	0	33.33	0	0	0	0	0	0	0	33.33	0	0
205800	1400	3767	3901	2934	4468	133.3	14080	0	1033	1433	33.33	0	0	0	0	0	0	0	0	0	0	0	0	0	0	0	0	33.33	0	100	0	0
204100	633.4	6836	3867	3434	4234	133.3	21190	66.67	900	1567	33.33	100	0	0	0	0	0	33.33	0	0	0	0	0	0	0	0	0	0	0	66.67	0	0
195900	466.7	1800	4301	2767	4001	200	14340	0	1333	1433	33.33	0	0	33.33	0	33.33	0	0	0	0	33.33	0	0	0	0	0	0	0	0	66.67	0	0
195700	733.4	5035	4735	2767	3401	133.3	10770	100	1333	1667	66.67	33.33	0	66.67	0	0	0	0	0	0	0	0	0	0	0	0	0	0	0	0	0	0
200900	766.7	1633	4068	3734	3567	33.33	17220	33.33	1233	1467	33.33	0	0	0	0	0	0	0	0	0	0	0	0	0	0	0	0	0	0	100	0	0
193800	1467	2334	4234	3167	3467	200	9939	0	966.7	1533	33.33	0	0	0	0	0	0	0	0	0	0	0	0	0	0	0	0	0	0	33.33	0	0
201900	533.3	1200	3934	3067	3601	200	9505	33.33	766.7	1633	33.33	0	0	33.33	0	33.33	0	0	0	0	0	0	0	0	0	0	0	0	0	0	0	0
195500	266.7	2934	4234	3167	3201	100	8004	33.33	1233	1834	0	0	0	0	0	33.33	0	0	0	0	0	0	0	0	0	0	0	0	0	33.33	0	0
198400	166.7	1600	3934	3467	3434	133.3	8604	100	733.4	1567	100	33.33	0	0	0	0	0	0	0	0	0	0	33.33	0	0	0	0	0	0	66.67	0	0
198000	1567	2834	4034	3301	3367	100	8237	33.33	1000	2000	0	0	0	0	0	0	0	0	0	0	0	0	0	0	0	0	0	0	0	100	0	0
202200	466.7	2300	4301	3134	3000	33.33	9505	133.3	1300	2000	33.33	0	0	0	0	0	0	0	0	0	33.33	33.33	0	0	0	0	0	0	0	66.67	0	0
199500	66.67	1233	4601	2934	3801	66.67	11540	66.67	933.4	1934	33.33	0	0	0	0	0	0	0	0	0	0	0	33.33	0	0	0	0	0	33.33	66.67	0	0
LA-map-VEMA-2 29/12/2016 12:27:07 (Run: 1)
202400	133.3	1567	4334	3501	3201	66.67	9905	33.33	966.7	1567	0	0	0	0	0	0	0	0	0	0	0	0	33.33	33.33	0	0	0	0	0	33.33	0	0
206600	100	1867	4234	3534	3000	0	9271	100	666.7	1300	0	0	0	33.33	0	0	0	0	0	0	0	0	33.33	0	0	0	33.33	0	0	66.67	0	0
203100	100	1800	3901	3234	3101	66.67	8404	33.33	1000	1233	0	0	0	0	0	0	0	0	0	0	0	0	0	0	0	0	0	0	0	33.33	0	0
194800	166.7	1533	4034	3201	4001	66.67	6769	133.3	1133	1033	0	0	0	33.33	0	0	0	0	0	0	33.33	0	0	0	33.33	0	0	0	0	66.67	0	0
201500	100	1200	4334	3167	3101	0	8871	33.33	1033	1733	0	0	0	0	0	0	66.67	0	0	33.33	0	0	0	33.33	0	0	0	0	0	33.33	33.33	0
202200	266.7	1700	3934	3434	4201	33.33	6569	33.33	866.7	2367	0	0	0	0	0	0	0	0	0	0	0	0	0	0	0	0	0	0	0	100	0	0
199600	0	1633	3867	3201	3234	0	6269	100	1067	1500	33.33	0	0	0	0	0	0	0	0	0	0	0	0	0	0	0	0	0	0	66.67	0	0
196100	500	1200	4068	2700	3434	33.33	7036	33.33	700	1834	0	0	0	0	0	0	0	0	0	0	0	0	0	0	0	0	33.33	0	0	100	0	0
193600	66.67	1000	3901	3367	3101	0	8704	100	1067	1733	0	0	0	0	0	0	0	0	0	0	0	0	0	0	33.33	0	0	0	0	33.33	0	0
199900	33.33	1000	3767	2867	3801	0	8170	33.33	700	2134	0	0	0	0	0	0	0	0	0	0	0	0	0	0	0	0	0	0	0	33.33	0	0
204200	66.67	1367	4468	2967	3334	133.3	6569	66.67	800	1667	33.33	0	0	33.33	0	0	0	0	0	0	0	0	0	0	33.33	0	0	0	0	66.67	0	0
199300	166.7	900	3501	4201	4001	66.67	7570	166.7	800	1800	0	0	0	0	0	33.33	0	0	0	0	0	0	0	0	0	33.33	0	0	0	33.33	0	0
194800	133.3	1200	3367	3301	3734	66.67	7570	100	1200	1300	33.33	0	0	33.33	0	0	0	0	0	0	0	0	0	0	0	0	0	0	0	200	0	0
193000	166.7	1300	4234	3601	2767	0	8170	33.33	966.7	1267	33.33	0	0	0	0	0	0	0	0	0	33.33	0	0	0	0	0	0	0	0	0	0	0
192800	100	1200	3834	3000	3367	0	8771	133.3	1133	1367	0	0	0	100	0	0	0	0	0	0	0	0	33.33	0	0	0	0	0	0	100	33.33	0
199400	33.33	1367	3968	3401	4334	66.67	7436	133.3	966.7	1533	0	0	0	0	0	0	0	0	33.33	0	0	0	0	0	0	0	0	0	0	100	0	0
195500	133.3	1133	4068	3334	2900	0	7970	66.67	966.7	1533	0	0	0	0	0	0	0	0	0	0	33.33	0	0	0	0	0	0	0	0	100	0	0
198600	66.67	1433	3801	2234	4134	0	8170	100	566.7	1367	33.33	0	0	0	0	0	0	0	0	0	0	0	0	0	0	0	0	0	0	33.33	0	0
198500	133.3	1433	4468	3167	3934	0	8471	200	800	1900	33.33	0	0	0	0	0	0	0	0	0	0	0	0	0	0	0	0	0	0	66.67	0	0
194500	33.33	1133	4434	3334	3167	66.67	7970	66.67	833.4	1533	33.33	0	0	0	0	0	0	0	0	0	0	0	0	0	0	0	33.33	0	0	33.33	0	0
195000	100	1233	3968	2534	3267	33.33	8771	66.67	600	1533	0	0	0	0	0	0	0	0	0	0	0	0	0	0	0	0	33.33	0	0	33.33	0	33.33
199100	33.33	1200	3134	3134	3401	0	9438	133.3	933.4	1233	0	0	0	0	33.33	33.33	0	0	0	0	0	0	0	0	0	0	0	0	0	33.33	0	33.33
196800	66.67	1200	3834	3234	3934	66.67	8037	100	733.4	1433	0	0	0	0	0	0	0	0	0	0	0	0	0	0	0	0	0	0	0	0	0	0
194700	0	1200	4468	2434	3167	33.33	7870	200	1367	1800	33.33	0	0	0	0	0	0	0	33.33	0	0	0	0	0	0	0	0	0	0	33.33	0	0
198500	33.33	1834	4101	3034	3767	66.67	7970	33.33	833.4	1633	0	0	0	0	0	0	0	0	0	0	0	0	0	0	0	0	0	0	0	33.33	0	0
195500	366.7	2367	4168	2634	4434	66.67	9205	0	833.4	1567	0	0	0	0	33.33	0	0	0	33.33	0	0	33.33	33.33	0	0	0	0	33.33	0	33.33	0	0
202600	6336	10970	3901	3301	3734	566.7	37740	133.3	966.7	1767	433.3	133.3	0	33.33	100	66.67	0	66.67	33.33	0	0	66.67	33.33	133.3	0	0	66.67	66.67	0	33.33	0	0
263900	134400	195800	19020	3767	17080	17750	625900	466.7	766.7	1667	4735	2734	66.67	366.7	900	133.3	200	133.3	33.33	66.67	100	266.7	333.3	100	66.67	100	66.67	166.7	0	0	33.33	0
515500	406900	668900	55800	2800	48700	52890	1938000	1100	1167	1567	15850	8738	166.7	733.4	2734	633.4	566.7	200	233.3	166.7	233.3	566.7	533.3	366.7	133.3	233.3	133.3	333.3	0	200	0	33.33
720300	751600	1625000	85670	3201	94830	89570	3210000	1700	1200	1934	33700	15110	366.7	1133	4134	966.7	833.4	333.3	433.3	433.3	666.7	933.4	600	566.7	300	300	233.3	400	33.33	33.33	0	0
1094000	1047000	2495000	121100	3901	125000	116300	4292000	2134	866.7	1967	41560	19320	366.7	1067	4601	1100	966.7	500	200	633.4	266.7	700	633.4	900	366.7	466.7	333.3	400	166.7	166.7	0	0
1173000	1172000	2561000	140100	2967	144200	136000	4919000	3134	1100	2600	53590	21390	366.7	1200	5135	1233	1167	166.7	500	600	600	966.7	733.4	800	466.7	366.7	233.3	533.3	66.67	133.3	33.33	33.33
1289000	1247000	2908000	164500	3934	159800	154000	6683000	3934	1033	2567	53220	23830	300	2134	6035	1133	1167	633.4	666.7	433.3	500	1000	866.7	666.7	233.3	400	333.3	533.3	100	100	33.33	0
1357000	1332000	2944000	173700	3367	159000	176600	6810000	4001	766.7	2434	54030	27040	266.7	2167	5835	1233	1267	466.7	800	633.4	533.3	1533	700	1000	500	633.4	233.3	466.7	33.33	233.3	33.33	33.33
1320000	1468000	2786000	165900	3401	166300	180500	7047000	4234	866.7	1867	52890	26940	466.7	1733	7303	1567	1767	433.3	533.3	633.4	666.7	1400	933.4	833.4	300	966.7	500	233.3	33.33	233.3	66.67	0
1338000	1578000	2764000	171900	3134	168000	190800	6842000	3367	700	1967	56140	28340	533.3	1800	7737	1333	1567	666.7	666.7	633.4	600	1433	1100	933.4	400	533.3	400	1033	133.3	266.7	133.3	0
1392000	1598000	2956000	191800	3567	179500	199600	7225000	3701	933.4	1800	61780	32090	533.3	2134	7903	1133	1567	566.7	666.7	433.3	900	966.7	1167	1367	333.3	400	566.7	600	66.67	266.7	33.33	33.33
1299000	1616000	2863000	196000	4134	179500	204400	7492000	4468	966.7	2500	52720	32490	466.7	2834	9638	1733	1967	533.3	400	633.4	933.4	1000	1033	1200	533.3	833.4	500	800	100	266.7	66.67	66.67
1361000	1560000	2735000	178600	2667	169900	193800	7220000	4301	800	1900	58080	33390	666.7	2500	8471	1400	2034	500	700	600	833.4	1300	1233	1267	633.4	1000	533.3	566.7	66.67	233.3	33.33	33.33
1421000	1441000	2831000	171200	3801	160000	217600	8203000	6436	866.7	2267	56810	35440	833.4	2767	12210	2334	1934	666.7	800	666.7	666.7	1633	1067	1233	433.3	666.7	233.3	500	66.67	66.67	66.67	66.67
1539000	1452000	2607000	190900	3667	174400	247900	9074000	6269	800	2634	55230	39150	600	4034	11040	2600	2367	533.3	1167	833.4	1133	1567	1567	1300	600	766.7	400	1000	233.3	300	66.67	100
1460000	1385000	2699000	190100	2900	158400	225800	8687000	5268	1167	2700	53120	39950	866.7	3301	11310	2100	1700	733.4	700	600	900	1367	1100	1233	600	833.4	400	833.4	233.3	233.3	33.33	33.33
1337000	1400000	2596000	166900	3167	166900	223700	8219000	6169	866.7	2267	51780	33090	500	2667	9438	1800	1433	600	633.4	633.4	833.4	1133	1100	1600	433.3	733.4	466.7	666.7	133.3	233.3	66.67	66.67
1349000	1342000	2701000	170200	3767	145500	230900	7835000	4234	1000	2334	48400	33700	533.3	2767	9238	1800	1867	433.3	866.7	900	1100	1300	1067	1100	300	733.4	333.3	333.3	200	233.3	33.33	33.33
1329000	1442000	2625000	175800	3834	154300	224700	8656000	5869	733.4	3201	54130	36640	733.4	3501	9105	2800	1800	833.4	700	800	1033	1167	866.7	1067	633.4	533.3	366.7	600	0	400	0	0
1368000	1460000	2609000	185700	3867	151700	219700	9008000	5402	933.4	2600	51240	36440	533.3	2167	8871	1733	1934	700	833.4	600	633.4	1100	1100	1533	500	666.7	300	566.7	33.33	366.7	100	33.33
1382000	1338000	2552000	183300	3834	157800	204500	8486000	4168	833.4	2900	54260	32660	666.7	2900	7603	1367	2100	733.4	566.7	466.7	800	1167	1067	1233	233.3	800	366.7	400	166.7	133.3	33.33	133.3
1432000	1345000	2745000	167400	4068	152900	206400	8092000	4901	1467	1934	49330	33630	666.7	3000	8471	1867	1967	433.3	500	566.7	600	1233	866.7	866.7	733.4	233.3	366.7	400	66.67	233.3	166.7	33.33
1263000	1320000	2370000	158100	3234	156000	201800	7571000	3934	1200	2167	50470	30690	800	2267	8704	1767	1733	500	666.7	566.7	700	1600	1033	733.4	566.7	566.7	300	533.3	66.67	200	100	0
1268000	1232000	2550000	152200	3434	147700	177000	7594000	3367	900	1867	51080	29580	700	2334	6702	1567	1934	233.3	333.3	633.4	600	1267	1100	600	266.7	566.7	433.3	766.7	66.67	100	33.33	33.33
1407000	1130000	2511000	153800	3467	136400	179400	6987000	3667	1000	2400	50470	24900	566.7	1967	6502	1834	1233	300	566.7	533.3	600	1167	733.4	1067	433.3	400	666.7	500	100	266.7	100	0
1213000	1173000	2349000	160700	3301	141400	187900	6884000	3867	966.7	1800	50070	27370	300	2234	6269	1200	1300	466.7	666.7	600	666.7	1233	1233	966.7	133.3	733.4	600	466.7	166.7	266.7	100	66.67
1280000	1253000	2613000	181800	4101	148100	175600	7599000	4134	966.7	2200	57720	30280	766.7	2100	8938	1500	1300	300	600	500	866.7	1267	766.7	1067	400	366.7	400	633.4	66.67	333.3	66.67	33.33
1232000	1221000	2401000	156600	3767	134900	206400	7475000	4835	1300	2034	54760	31960	600	2600	9105	1367	1467	400	533.3	633.4	566.7	1033	1033	900	466.7	700	466.7	666.7	133.3	133.3	33.33	100
1463000	1194000	2441000	150000	3134	136900	208000	7861000	4768	1067	3434	50410	32730	566.7	2767	9038	1700	1867	433.3	200	733.4	666.7	1167	1000	933.4	366.7	600	366.7	666.7	33.33	66.67	66.67	33.33
1321000	1191000	2569000	150500	3401	121200	226800	7427000	4234	1300	2767	49100	33130	533.3	2767	8871	1733	1667	466.7	600	733.4	633.4	1267	1300	700	366.7	366.7	300	833.4	66.67	233.3	133.3	166.7
1302000	1228000	2422000	150000	3801	121600	203200	7656000	5168	1033	2900	47220	33290	500	3401	8504	2200	1667	633.4	633.4	366.7	866.7	1100	1067	900	633.4	633.4	466.7	533.3	100	133.3	33.33	33.33
1182000	1261000	2372000	146200	4534	107200	174700	6812000	3968	933.4	3134	46280	32420	566.7	3000	8504	1767	1500	266.7	633.4	933.4	566.7	1067	766.7	1000	366.7	633.4	366.7	500	66.67	300	233.3	100
1257000	1202000	2171000	142900	4701	101200	173300	6400000	3734	1100	2200	45150	28850	400	3034	7570	1733	1433	200	533.3	666.7	566.7	1300	900	833.4	466.7	600	433.3	833.4	33.33	433.3	66.67	66.67
1371000	1301000	2384000	149000	3734	135900	186200	6623000	4134	1300	2767	48600	31190	900	2767	8371	1433	1667	533.3	1000	666.7	733.4	1167	1300	1433	566.7	733.4	266.7	633.4	0	100	0	33.33
1492000	1466000	2771000	150000	3401	142200	187100	7252000	4534	933.4	2400	50640	31760	633.4	2967	8804	1900	1900	533.3	400	400	1167	1300	900	1033	600	866.7	366.7	533.3	266.7	233.3	33.33	0
1284000	1448000	2730000	168200	4134	151700	183700	7876000	4701	800	2834	50940	31760	600	2934	9338	1834	1667	433.3	633.4	1067	866.7	966.7	733.4	1167	466.7	433.3	400	1000	100	300	0	0
1266000	1344000	2591000	153000	4434	146900	184200	6493000	3634	1033	2300	46620	30050	400	3301	9071	1900	1367	500	600	766.7	733.4	1233	1133	866.7	466.7	866.7	233.3	533.3	166.7	166.7	100	33.33
1154000	1227000	2520000	163100	3701	137000	177800	6466000	3734	966.7	2000	50410	30790	733.4	3234	8204	1733	1867	633.4	566.7	700	866.7	900	700	700	466.7	433.3	500	700	66.67	333.3	133.3	0
1368000	1150000	2480000	144300	3867	135400	176000	6467000	3000	900	2334	48060	32260	466.7	2767	11040	1600	2367	666.7	500	733.4	500	1033	833.4	900	300	666.7	366.7	433.3	100	233.3	133.3	100
1283000	1020000	2381000	142000	3167	127000	177600	6587000	3667	1033	2067	48260	33560	733.4	3501	9839	2167	1900	366.7	300	933.4	633.4	1200	1233	1100	400	400	633.4	933.4	133.3	200	66.67	0
1492000	1075000	2474000	156600	3034	135600	175800	6810000	4801	1100	2500	53490	34330	666.7	3534	9438	1467	1600	500	833.4	800	733.4	933.4	1200	1100	500	666.7	433.3	700	233.3	266.7	66.67	0
1376000	1136000	2615000	159400	3767	142300	177200	6503000	3767	1167	2200	47090	29110	666.7	2134	8371	1733	1633	533.3	700	633.4	933.4	766.7	866.7	1133	400	500	266.7	466.7	66.67	233.3	66.67	33.33
1305000	1249000	2489000	151800	3367	140600	164000	6729000	3534	1233	1967	51180	27510	533.3	2900	7270	1867	1300	400	800	633.4	766.7	1033	1233	1167	400	800	266.7	633.4	33.33	133.3	33.33	33.33
1354000	1252000	2563000	166100	3701	146700	172200	6861000	3767	833.4	2500	56070	27410	533.3	2667	8404	1567	1767	500	500	633.4	633.4	1100	1133	866.7	566.7	766.7	300	733.4	0	33.33	166.7	33.33
1441000	1245000	2686000	161100	4434	147200	193400	7236000	4434	1367	2334	50980	27740	700	2134	7970	1567	1200	600	566.7	766.7	700	1033	1133	1100	566.7	433.3	333.3	666.7	33.33	200	0	33.33
1364000	1132000	2555000	169600	3567	140300	172200	6817000	4901	1100	2500	48930	28510	700	2500	7370	1733	1467	366.7	566.7	533.3	600	1367	933.4	900	333.3	566.7	433.3	466.7	66.67	200	33.33	0
1313000	1108000	2368000	148600	3467	130600	161200	6131000	3434	1233	2034	43500	27310	466.7	2467	6803	1800	1333	266.7	500	433.3	566.7	1167	1033	1100	433.3	666.7	133.3	733.4	66.67	233.3	66.67	0
1165000	1040000	2517000	142000	3567	131600	162100	6294000	3467	1267	2067	47390	26370	633.4	2234	7370	1500	1367	466.7	366.7	666.7	733.4	1033	933.4	533.3	400	500	366.7	500	100	200	66.67	0
1242000	1191000	2231000	134900	3601	127300	164600	6112000	3334	1000	2000	44910	25170	566.7	2867	6302	1567	1300	333.3	666.7	733.4	633.4	1133	900	866.7	433.3	300	166.7	633.4	66.67	233.3	66.67	33.33
1152000	1097000	2315000	136200	3334	126900	148300	5869000	2900	766.7	2100	43100	23000	800	1667	6903	1133	1133	200	466.7	466.7	733.4	800	833.4	866.7	300	566.7	466.7	466.7	0	300	66.67	33.33
1106000	1036000	2588000	139400	3767	122600	129300	5443000	3467	1167	1934	49640	22430	533.3	1600	5368	1367	866.7	133.3	266.7	700	566.7	700	600	633.4	200	500	233.3	433.3	100	66.67	66.67	33.33
1194000	879300	2899000	139700	3501	124500	106600	4827000	2800	1200	1633	54130	17650	433.3	1834	5635	866.7	900	266.7	466.7	500	266.7	733.4	433.3	466.7	66.67	266.7	100	400	66.67	166.7	0	33.33
1181000	758900	3416000	145500	4001	136700	91490	3673000	2200	1267	1600	56940	12780	300	1433	4101	800	766.7	200	266.7	300	366.7	300	433.3	500	200	266.7	166.7	300	100	200	33.33	0
1104000	578900	3227000	128500	3267	125500	62080	3034000	2334	1167	1800	63860	10410	366.7	966.7	2834	466.7	300	100	266.7	133.3	200	333.3	233.3	266.7	166.7	266.7	133.3	233.3	0	0	0	33.33
1301000	390900	4104000	146300	3267	144400	46120	1892000	900	700	1900	68520	7770	266.7	566.7	2934	400	433.3	66.67	166.7	66.67	266.7	333.3	233.3	133.3	66.67	66.67	100	33.33	0	33.33	0	0
1436000	301700	4450000	142700	2900	132900	36240	1508000	833.4	833.4	1800	66170	5735	500	266.7	1834	333.3	233.3	166.7	200	233.3	100	166.7	200	266.7	100	100	33.33	233.3	33.33	100	0	0
1289000	315700	3954000	134600	3034	132300	36770	1482000	966.7	866.7	1800	61170	6069	366.7	433.3	1900	600	366.7	66.67	200	200	200	233.3	200	133.3	133.3	100	66.67	100	0	166.7	0	0
1480000	388200	3778000	124500	3434	130100	50470	1767000	900	1233	1800	57720	8637	200	466.7	2200	300	566.7	66.67	200	266.7	133.3	333.3	166.7	266.7	200	266.7	133.3	133.3	66.67	66.67	0	33.33
1108000	437800	3289000	128700	3034	129800	53790	2562000	866.7	1133	1333	49430	9672	233.3	1067	2900	533.3	400	166.7	200	66.67	266.7	466.7	366.7	266.7	200	233.3	166.7	266.7	100	133.3	100	0
1129000	525600	3394000	137200	3834	129300	67620	2282000	1600	1067	1400	52580	9405	233.3	733.4	2600	700	666.7	233.3	133.3	200	233.3	433.3	400	533.3	200	200	133.3	166.7	33.33	66.67	0	66.67
1805000	629600	3093000	131300	3534	134000	77630	2725000	1700	1067	1633	54760	11210	266.7	566.7	3000	566.7	966.7	366.7	300	233.3	500	633.4	466.7	500	166.7	300	133.3	333.3	100	233.3	0	0
1156000	818400	3243000	137200	3401	149300	102300	3954000	2900	1000	1600	57720	16410	533.3	1300	4601	633.4	1200	266.7	333.3	500	400	733.4	500	533.3	266.7	633.4	333.3	200	33.33	133.3	0	0
1308000	996500	3048000	150600	3501	139200	120800	4542000	2467	1000	2100	56140	19960	566.7	1600	4835	900	1000	233.3	666.7	400	566.7	1233	766.7	366.7	466.7	533.3	433.3	333.3	0	133.3	0	33.33
1293000	1108000	2912000	153700	4234	143800	132100	4833000	2634	866.7	2067	52450	20920	433.3	1800	4835	1000	1100	266.7	366.7	433.3	533.3	900	400	700	233.3	500	433.3	533.3	66.67	66.67	66.67	0
1392000	1222000	2882000	162500	3901	161300	161400	5639000	2867	1100	1633	57110	25030	866.7	2067	5168	1667	1433	333.3	466.7	333.3	866.7	1000	866.7	733.4	400	633.4	366.7	766.7	100	166.7	133.3	0
1301000	1382000	2907000	163600	3434	151800	155400	5962000	4101	866.7	2000	51040	24470	633.4	1667	6169	1333	1267	433.3	566.7	833.4	733.4	900	1033	733.4	433.3	800	333.3	666.7	100	66.67	0	33.33
1357000	1438000	2874000	169800	3501	160700	177600	6227000	3067	1133	1934	51480	26040	566.7	1900	5935	1300	1500	400	400	400	733.4	1500	766.7	866.7	766.7	600	566.7	500	100	233.3	0	0
1342000	1487000	2875000	172400	3467	164600	174300	6727000	3867	1067	1633	54190	28240	666.7	2567	7570	1867	1300	400	666.7	600	733.4	1333	1067	466.7	266.7	833.4	266.7	633.4	200	133.3	100	0
1390000	1499000	2922000	181300	3334	163900	188700	6719000	3901	1467	1900	51580	28650	400	2534	7370	1800	1433	233.3	600	566.7	700	1367	1000	866.7	400	400	366.7	833.4	100	100	133.3	33.33
1322000	1429000	2875000	164900	3767	168900	197500	6782000	3734	900	2100	51750	30220	533.3	2434	7203	1633	1200	500	733.4	800	900	1067	766.7	1000	566.7	666.7	133.3	566.7	133.3	300	100	0
1278000	1493000	2784000	173900	3801	168500	208400	7065000	4301	1333	1900	57010	32020	433.3	1834	8504	1667	1700	366.7	433.3	733.4	1133	1567	1300	1400	566.7	766.7	633.4	900	100	0	33.33	0
1631000	1571000	3092000	179100	4068	180800	229100	7430000	4768	1233	2134	62310	41900	766.7	3201	10310	2134	2400	600	533.3	633.4	933.4	1400	1133	1100	266.7	633.4	433.3	900	233.3	333.3	33.33	33.33
1453000	1540000	3414000	194700	4034	187800	227400	7606000	4501	1167	1867	62780	41730	600	3201	10040	2400	2134	633.4	866.7	566.7	1200	1600	1033	866.7	433.3	800	566.7	600	200	366.7	66.67	100
1602000	1587000	3306000	228300	3634	195600	233400	7412000	4101	966.7	2100	65070	39590	566.7	3701	10570	2100	2834	733.4	1200	800	1067	1433	933.4	1400	666.7	1000	500	900	266.7	200	33.33	33.33
1694000	1649000	3258000	191700	3901	194800	245000	8101000	3834	1133	2134	63720	46450	1067	3401	9772	2067	2600	566.7	700	933.4	1033	1467	1133	1400	366.7	633.4	533.3	866.7	366.7	233.3	133.3	33.33
1500000	1904000	3176000	201000	3434	171800	218700	8348000	4501	1200	2200	62880	39850	766.7	3801	11170	2000	1867	533.3	700	833.4	1200	1567	1500	1100	366.7	566.7	400	533.3	200	466.7	66.67	0
1482000	1725000	2811000	175600	3501	155600	228200	7797000	5302	1233	2300	61940	42300	600	3401	13710	2400	1900	366.7	633.4	866.7	900	1667	966.7	1167	833.4	733.4	600	833.4	133.3	400	100	66.67
1530000	1567000	2897000	176700	3901	159900	241800	8191000	5668	1433	2834	63620	45250	1100	4401	12380	3000	2267	500	866.7	666.7	1000	1767	1267	1767	766.7	833.4	633.4	933.4	133.3	366.7	233.3	100
1620000	1670000	2995000	182200	4168	152100	251300	9069000	5201	1033	3101	56980	45880	933.4	5001	15080	3201	2600	833.4	866.7	1033	1033	2200	1433	1467	833.4	900	800	900	200	400	133.3	100
2052000	1411000	3014000	190400	4068	153900	263600	9207000	5468	1100	3434	62410	59860	1133	5035	17180	2767	2200	1000	866.7	1100	1367	2200	1767	1367	900	1033	733.4	1200	233.3	400	266.7	200
1719000	1253000	2963000	192000	3134	142000	252200	8914000	6569	933.4	3134	59260	60870	866.7	5935	16980	3467	3334	1133	766.7	1367	900	2800	2067	1800	666.7	1000	766.7	1133	433.3	666.7	133.3	66.67
2161000	1248000	3466000	212100	3701	161800	278000	8812000	6836	1267	3501	69570	60970	833.4	5535	18990	3767	3334	933.4	1400	1100	1067	2000	1600	1433	800	933.4	633.4	1200	266.7	200	133.3	33.33
2153000	1225000	3715000	223000	3367	185200	291500	9153000	7036	833.4	3134	75310	60370	1167	5735	17280	3467	3000	400	1267	1067	1333	1834	1300	1667	500	800	633.4	833.4	266.7	333.3	166.7	100
2073000	1171000	3501000	227100	3334	177200	261400	8784000	6502	1233	2667	68420	49330	866.7	5068	13640	3367	2800	1067	733.4	1033	1233	1567	1067	1267	433.3	933.4	600	1233	333.3	300	66.67	100
1737000	1159000	3290000	198000	3401	169100	217300	7630000	5001	1200	2600	66610	43140	1067	4101	12170	1967	2300	566.7	800	833.4	800	1667	1100	833.4	333.3	700	366.7	1100	66.67	266.7	100	0
1639000	1300000	3229000	206400	3901	173200	237900	8347000	5802	1100	2667	61040	38410	1167	3701	13010	2367	2600	600	900	1000	933.4	1333	1533	1467	466.7	700	466.7	533.3	200	300	100	33.33
1713000	1419000	3393000	214000	2867	183200	243600	9095000	6002	1000	2734	69360	42130	1133	3834	11340	2267	2067	733.4	933.4	933.4	933.4	1667	1467	1767	500	1100	433.3	900	333.3	333.3	33.33	0
1637000	1484000	3254000	205000	3301	171800	227600	9033000	5168	833.4	2334	61040	43870	766.7	3467	10710	2567	2000	666.7	833.4	766.7	1100	1934	1200	1467	633.4	633.4	233.3	566.7	66.67	200	33.33	0
1559000	1378000	3074000	186500	3901	168300	224800	8478000	4835	1000	2700	60130	36270	1167	3334	10310	1800	2067	333.3	866.7	1033	1000	1934	1200	1133	466.7	1033	333.3	533.3	233.3	100	133.3	100
1598000	1603000	3103000	203800	3667	185500	247600	8671000	5035	1300	1967	70140	39550	766.7	3467	11510	1700	1733	500	766.7	900	900	1533	1300	1233	633.4	700	366.7	733.4	33.33	166.7	0	0
1659000	1626000	3281000	205900	3367	191000	259700	8632000	5468	1100	1633	68490	40290	733.4	3201	9171	1834	1700	666.7	966.7	566.7	933.4	1400	1500	1433	733.4	966.7	833.4	600	33.33	300	0	0
1613000	1701000	3453000	212200	4301	196900	251800	8610000	5001	1200	2134	65540	37540	833.4	3401	10640	1834	1767	500	700	933.4	1000	1467	933.4	933.4	800	900	333.3	1067	133.3	266.7	66.67	66.67
1644000	1729000	3271000	205900	2800	200400	234300	7915000	4168	1233	1934	65430	33800	766.7	3334	8804	2034	1533	600	1067	1067	900	1400	1200	1433	366.7	833.4	433.3	733.4	0	133.3	66.67	133.3
1571000	1588000	3329000	200900	3767	199300	241800	8511000	4534	1233	1867	64130	36240	700	2934	10210	1867	2300	600	766.7	533.3	733.4	1400	1267	1133	466.7	600	400	700	66.67	166.7	0	0
1436000	1544000	3169000	187200	3701	183500	220400	7797000	4234	1333	1467	59590	34360	666.7	2800	8771	1667	2000	733.4	600	1133	833.4	1167	1300	1333	233.3	600	400	800	166.7	233.3	133.3	33.33
1564000	1538000	3143000	197700	3434	189400	233100	8017000	4301	966.7	1467	69530	35670	866.7	3867	9171	2434	2600	600	666.7	633.4	733.4	1500	1667	1233	833.4	666.7	966.7	1000	100	333.3	100	33.33
1666000	1627000	3284000	223600	4168	193200	234300	8241000	4768	1267	1867	65900	39790	733.4	3567	10270	2134	2500	300	866.7	633.4	833.4	1767	1834	1467	366.7	900	566.7	833.4	66.67	366.7	33.33	66.67
1646000	1663000	3790000	212000	3867	216300	261000	9200000	5602	1167	2067	71550	40190	633.4	2867	11740	2434	2600	433.3	700	733.4	1100	1333	1900	1300	700	1100	566.7	766.7	133.3	200	133.3	33.33
1628000	1752000	3264000	211500	3534	209600	271400	9398000	6169	1367	1967	67350	40390	900	3634	11510	2667	2167	666.7	1000	933.4	1300	1900	1767	1500	666.7	833.4	400	1133	166.7	300	33.33	33.33
1658000	1567000	3337000	217000	4334	185700	306300	9753000	5802	1300	2167	60840	46790	1033	4068	12310	2400	2367	500	1167	966.7	1167	1767	1200	1900	400	600	500	600	166.7	233.3	100	33.33
1533000	1409000	3009000	183200	3234	169900	295500	9414000	6502	1333	2900	56210	42470	766.7	3968	14080	3000	2400	933.4	800	1000	1400	1567	1733	1934	600	1033	466.7	1000	33.33	366.7	133.3	33.33
1609000	1387000	3037000	197700	3267	171400	306000	10040000	7536	1033	1867	67550	48430	633.4	4068	14480	2367	2534	933.4	866.7	933.4	1500	1900	1200	1300	366.7	766.7	666.7	1033	233.3	233.3	233.3	33.33
1617000	1387000	3545000	222700	3834	200400	292600	10840000	6969	1433	1900	72420	46550	933.4	5602	13080	3601	2700	633.4	1167	1367	1167	2000	1467	1733	1033	1167	866.7	866.7	100	300	0	133.3
1757000	1461000	3967000	214600	3901	199300	280300	9501000	5768	1433	2300	70340	40930	666.7	4034	12010	2900	2767	533.3	866.7	700	1333	1600	1200	1467	333.3	600	266.7	633.4	200	366.7	133.3	100
1545000	1165000	3504000	194500	3834	170200	228700	7279000	5235	1167	1733	60770	30350	566.7	3501	9905	2200	1533	400	633.4	433.3	1133	1100	766.7	600	433.3	500	266.7	666.7	166.7	300	0	0
1535000	936200	4428000	205100	3501	188500	157000	6032000	4434	1033	1900	76690	24430	633.4	2100	7103	1500	966.7	333.3	433.3	366.7	700	1000	466.7	666.7	300	500	233.3	333.3	100	233.3	0	33.33
1604000	1841000	4574000	183000	3834	178800	109300	5542000	3267	1067	2267	65840	16250	333.3	2100	4735	700	1033	200	433.3	433.3	600	500	366.7	533.3	233.3	300	166.7	133.3	33.33	133.3	33.33	66.67
1153000	1957000	3017000	150500	3667	116900	76990	5020000	3067	1133	2100	43540	11610	433.3	1100	3834	800	533.3	233.3	333.3	433.3	233.3	500	366.7	333.3	266.7	266.7	100	333.3	33.33	100	0	66.67
938700	7194000	1958000	165800	3534	76290	60060	8828000	4201	1333	2934	27540	10170	166.7	866.7	2667	366.7	566.7	133.3	66.67	133.3	266.7	300	166.7	233.3	33.33	166.7	166.7	166.7	33.33	233.3	33.33	33.33
640200	7226000	1413000	157400	4001	54160	42430	8792000	3534	766.7	2167	22800	7036	66.67	666.7	1467	566.7	433.3	100	166.7	100	166.7	233.3	200	133.3	66.67	100	66.67	0	33.33	66.67	0	0
635200	7018000	1104000	134600	3767	43470	48400	7944000	3801	1133	3401	16250	8304	233.3	500	1967	700	566.7	133.3	66.67	133.3	200	266.7	266.7	166.7	133.3	300	166.7	100	33.33	166.7	0	0
708100	4188000	1253000	114000	4101	38480	104500	7445000	4068	1267	4034	18520	14380	300	1367	3167	966.7	833.4	200	166.7	33.33	66.67	566.7	266.7	366.7	66.67	133.3	100	166.7	66.67	100	0	0
634900	2205000	983500	84730	3334	34830	118000	5083000	3234	900	4234	30990	26440	633.4	2467	7937	1767	1567	666.7	733.4	466.7	600	1333	1000	733.4	466.7	566.7	400	633.4	333.3	466.7	200	33.33
1876000	2115000	3077000	199000	3934	106000	351700	9473000	6269	1100	5768	64060	48730	1233	3767	13780	2500	2134	333.3	633.4	666.7	933.4	1667	1133	1067	566.7	733.4	633.4	566.7	100	266.7	33.33	33.33
1511000	1983000	2322000	172200	3901	99470	206700	7182000	4034	1267	4668	42470	39250	800	2434	7803	1834	1667	333.3	700	866.7	633.4	1333	900	800	300	666.7	433.3	933.4	233.3	466.7	66.67	0
1342000	2080000	2347000	158600	4401	95160	171000	7250000	3968	1200	5168	43000	39050	1100	2600	5335	1500	866.7	266.7	133.3	466.7	500	800	566.7	600	166.7	300	133.3	433.3	133.3	300	33.33	0
1087000	1675000	1494000	108700	3034	80350	111000	5021000	2800	1100	3334	29650	23630	366.7	1200	3101	600	800	333.3	133.3	333.3	333.3	466.7	233.3	466.7	300	233.3	400	233.3	33.33	100	0	0
734800	1243000	1134000	99100	3134	52850	79210	3426000	1700	666.7	2500	24170	17880	233.3	1367	3367	500	466.7	233.3	166.7	100	66.67	466.7	366.7	100	100	266.7	233.3	266.7	0	500	33.33	0
1283000	1326000	1543000	121200	3701	95400	111700	4907000	2467	966.7	3201	38350	27910	500	1533	5268	1067	700	433.3	366.7	600	633.4	800	966.7	566.7	366.7	366.7	233.3	333.3	66.67	366.7	0	33.33
1146000	1646000	2271000	163900	3634	134800	151300	6073000	3301	1100	3201	51140	33430	900	1834	5869	1767	1400	433.3	566.7	600	833.4	1267	1133	900	533.3	600	366.7	566.7	100	633.4	33.33	66.67
1472000	1951000	3003000	188700	3401	171300	210000	7280000	4534	1367	2867	67680	36240	966.7	2167	8738	2100	1700	500	500	700	833.4	1367	1400	1267	533.3	533.3	733.4	500	66.67	500	66.67	33.33
1647000	2180000	3341000	228800	3801	220200	238100	8876000	5869	866.7	3101	75510	41060	600	2267	8304	1900	2134	633.4	633.4	633.4	900	1834	1333	1633	566.7	933.4	366.7	866.7	200	700	33.33	66.67
1757000	2314000	3675000	235100	3767	225400	254100	9902000	5001	1433	2767	79980	42260	933.4	2800	9171	2100	2100	833.4	1000	1033	866.7	1700	1300	1233	566.7	1000	600	800	233.3	300	66.67	33.33
1549000	2140000	3270000	223800	3267	214100	240600	8608000	5035	1067	2034	65400	38250	600	2867	8771	1834	2000	500	866.7	1200	900	1500	1133	1467	566.7	600	433.3	633.4	233.3	233.3	233.3	0
1523000	2066000	3274000	210300	4168	206200	261100	8871000	5635	1267	2134	72250	42930	900	2900	10970	1900	1300	666.7	833.4	900	1167	1633	2000	1100	766.7	800	666.7	933.4	166.7	633.4	66.67	0
1544000	1929000	3629000	219200	3301	215600	246400	9008000	5568	1000	2200	67350	36410	533.3	3234	9305	1934	1767	666.7	1000	933.4	833.4	900	1333	1000	466.7	700	466.7	766.7	100	366.7	133.3	0
1577000	1820000	3178000	203400	3767	197000	248000	9168000	4968	966.7	2267	63390	40260	600	3634	10570	2267	2467	733.4	800	1000	1333	2067	1633	1500	533.3	700	933.4	666.7	133.3	500	66.67	0
1800000	1892000	3567000	222000	4068	183800	263700	9901000	5468	1133	2067	67520	45350	733.4	4401	12440	2500	1867	700	1233	733.4	1000	1233	1333	1200	500	833.4	400	800	133.3	266.7	66.67	100
1731000	1565000	3258000	201900	3534	184000	272800	8928000	5368	933.4	2167	65230	39250	600	3201	8971	2100	2100	700	633.4	1200	900	2100	1400	1300	666.7	700	433.3	833.4	100	400	66.67	33.33
1708000	1676000	3385000	210700	3801	189500	261100	9465000	4968	1267	1867	71850	39390	866.7	2867	10440	2734	1667	600	800	900	833.4	1200	1233	833.4	700	500	566.7	566.7	166.7	400	33.33	100
1747000	1668000	3449000	200600	4101	191900	254400	9102000	4801	1500	1533	65000	37740	666.7	2067	10610	2067	1667	633.4	666.7	966.7	500	1600	1033	1300	466.7	500	300	500	233.3	466.7	33.33	100
1625000	1776000	3254000	203600	4301	184700	251300	8413000	5235	1167	1633	64900	32520	566.7	2234	8571	2134	1100	500	833.4	566.7	866.7	1367	1000	1100	266.7	900	400	500	0	266.7	0	66.67
1373000	1437000	2927000	178400	3667	179700	196800	6655000	3934	966.7	1934	62850	25840	633.4	2167	6969	1633	1400	433.3	266.7	666.7	700	833.4	500	1133	400	366.7	333.3	466.7	100	366.7	33.33	33.33
1547000	1440000	3751000	206500	3934	189200	210900	7383000	4101	1400	1633	74070	29380	566.7	2100	6936	1267	1233	500	533.3	500	333.3	1067	700	900	466.7	433.3	466.7	700	100	366.7	200	66.67
1564000	1471000	3122000	169800	3901	170500	213200	6975000	3834	1100	2134	56470	29010	600	2567	6336	1600	1333	300	500	700	766.7	1000	933.4	933.4	333.3	700	433.3	466.7	100	333.3	0	33.33
1428000	1415000	2880000	170700	3734	169800	206100	7006000	3434	766.7	2600	50140	30150	400	1700	7270	1300	1367	300	700	533.3	500	866.7	600	1033	333.3	566.7	433.3	733.4	100	200	100	0
1441000	1325000	2969000	170600	3301	169600	182700	6240000	4468	1100	2567	57180	26270	800	2500	6135	1200	1400	400	866.7	433.3	466.7	1467	900	1100	433.3	566.7	333.3	533.3	66.67	66.67	66.67	0
1451000	1307000	3087000	156300	3201	164900	176900	7388000	4134	800	2734	64090	26370	533.3	1700	6502	800	1067	200	333.3	566.7	400	666.7	733.4	800	333.3	600	466.7	600	100	400	166.7	0
1394000	1274000	3101000	188700	4501	162400	162700	6233000	4568	700	2100	59800	29780	333.3	1900	7270	1533	1900	533.3	466.7	600	1033	966.7	1167	1100	366.7	700	533.3	900	33.33	300	33.33	0
1410000	1422000	3068000	173900	3234	190500	173200	6694000	3901	900	2034	55900	31150	733.4	1967	8304	1433	1700	566.7	533.3	600	666.7	1267	800	833.4	400	766.7	500	400	133.3	133.3	0	0
1311000	1340000	2586000	165900	3567	155000	167400	5865000	3701	1233	2767	53620	27910	466.7	2000	7903	1433	1367	666.7	500	333.3	500	1433	1133	766.7	433.3	566.7	266.7	600	33.33	166.7	66.67	0
1345000	1396000	2870000	173200	3801	168800	185400	6702000	4468	1033	1633	54400	28980	733.4	2734	7169	2034	1600	433.3	733.4	800	733.4	1133	933.4	700	500	866.7	400	600	133.3	300	100	0
1436000	1452000	3098000	188900	3867	181200	220900	7921000	4735	866.7	2467	60060	35740	833.4	2367	8371	1500	1600	500	533.3	733.4	700	1267	1300	900	833.4	500	333.3	633.4	33.33	333.3	100	0
1385000	1258000	2875000	170900	3434	155800	186400	7005000	5001	1167	2734	54660	27440	700	2367	8771	1867	2200	466.7	500	566.7	633.4	1067	1100	833.4	366.7	533.3	200	700	133.3	366.7	33.33	33.33
1349000	1201000	2747000	193600	3834	146100	175200	7668000	4101	1100	2834	54030	29580	800	3267	9371	2034	1700	666.7	766.7	566.7	633.4	1467	1467	1100	400	966.7	300	566.7	66.67	366.7	100	66.67
1529000	1194000	2835000	168800	3701	135300	163500	7516000	4301	1233	4835	51010	35170	1000	3167	9271	2100	1834	366.7	600	666.7	800	1633	1133	1033	566.7	733.4	266.7	300	200	200	100	66.67
1345000	1062000	2667000	174800	3534	136000	182000	7541000	5068	1167	3334	57410	40020	1000	3134	12140	2434	1967	866.7	833.4	733.4	633.4	1233	1167	1533	300	766.7	300	933.4	133.3	333.3	133.3	0
1950000	1290000	2885000	189800	4401	168700	191800	8046000	5402	1267	2534	51710	31960	700	2534	8637	1533	1733	466.7	866.7	500	800	1167	1100	1233	400	500	433.3	500	66.67	166.7	0	66.67
1655000	1280000	2632000	162700	3867	166300	194900	7742000	5068	1067	3601	53220	30220	466.7	2634	8471	2067	1834	533.3	1000	533.3	833.4	866.7	1167	933.4	533.3	600	400	566.7	133.3	233.3	166.7	0
1384000	1357000	2599000	172200	4201	148700	172600	7016000	4001	1067	2167	51080	29580	600	2700	6936	1667	1533	666.7	766.7	533.3	666.7	1267	1200	900	533.3	466.7	400	500	100	166.7	133.3	100
1337000	1352000	2557000	171100	3234	160900	177100	6997000	3567	1067	2400	54430	28040	733.4	2367	7637	1467	1567	533.3	533.3	433.3	833.4	866.7	1233	1033	333.3	633.4	300	833.4	66.67	200	100	0
1293000	1218000	2464000	158300	3000	145400	167700	6730000	4034	1200	1667	52890	26470	1000	2567	8637	1900	1400	333.3	833.4	500	466.7	966.7	1200	900	366.7	433.3	466.7	566.7	66.67	266.7	33.33	33.33
1517000	1447000	2911000	185800	3467	172500	183400	7464000	4134	1367	2200	59020	29750	400	2167	7470	1467	1433	366.7	800	800	800	1067	933.4	833.4	366.7	633.4	400	733.4	133.3	200	33.33	33.33
1309000	1294000	2890000	159800	3101	169600	164400	6568000	3767	1100	2200	51880	27710	666.7	1800	6502	1100	1367	333.3	866.7	633.4	700	1067	1100	900	366.7	766.7	433.3	600	66.67	366.7	33.33	33.33
1353000	1174000	2526000	158900	3801	142600	175900	6638000	4068	1000	1333	54600	32420	466.7	3034	8504	2300	1834	533.3	533.3	733.4	600	1233	600	1133	666.7	633.4	433.3	633.4	100	100	33.33	0
1322000	1359000	2786000	180500	3634	157400	188900	6791000	3634	966.7	2134	50540	31250	566.7	2734	8604	1867	2134	700	533.3	633.4	533.3	1567	933.4	1000	433.3	666.7	333.3	466.7	100	233.3	100	33.33
1318000	1229000	2570000	162300	3167	148700	220600	8228000	4835	1367	2634	53090	35570	633.4	3201	10410	1967	1433	733.4	600	866.7	800	1033	1167	1133	433.3	566.7	333.3	533.3	133.3	433.3	33.33	33.33
1254000	1229000	2471000	154000	3767	142400	225300	7740000	4735	1100	2300	46920	31760	633.4	2400	8838	1867	1600	566.7	533.3	833.4	966.7	1500	733.4	1033	600	633.4	233.3	533.3	166.7	266.7	0	33.33
1243000	1289000	2621000	159600	3167	153200	183900	7578000	4434	1033	2000	45750	26570	666.7	2500	6502	1333	1167	300	400	433.3	866.7	1033	1067	733.4	200	600	333.3	566.7	200	66.67	0	0
1221000	1116000	2712000	165500	3234	166500	201400	7340000	4168	1033	1967	61940	30350	600	2600	7903	1533	1633	500	733.4	500	833.4	1633	733.4	900	400	566.7	433.3	633.4	33.33	300	33.33	0
1368000	1334000	2850000	160700	2967	160200	187300	6995000	4234	933.4	2067	52650	28910	400	2334	5969	2000	1733	366.7	400	466.7	533.3	1133	1133	900	266.7	666.7	400	733.4	100	166.7	66.67	0
1222000	1470000	2671000	175000	3301	147400	176000	6734000	4501	833.4	2134	50670	29610	600	2500	10010	1200	1900	566.7	733.4	900	733.4	1233	866.7	1033	566.7	400	233.3	566.7	66.67	233.3	33.33	0
1138000	1496000	2468000	147000	3801	132000	156300	7252000	3567	1233	2067	51240	26270	666.7	2167	5869	1667	1300	466.7	466.7	700	700	966.7	1233	833.4	200	433.3	533.3	500	66.67	166.7	66.67	66.67
1452000	2049000	2762000	167500	3501	118300	160900	8006000	4668	933.4	1800	55640	28210	566.7	1834	8304	2234	1867	633.4	433.3	433.3	600	1100	700	566.7	266.7	433.3	733.4	466.7	133.3	266.7	0	100
1338000	1364000	2375000	145000	3501	120300	156800	6471000	3601	1433	2334	43740	27040	666.7	2667	8838	1367	1567	566.7	533.3	433.3	500	800	966.7	1100	400	366.7	466.7	333.3	166.7	133.3	33.33	0
995600	870200	1670000	97920	2600	83310	107100	4037000	2967	1333	2100	27170	14910	300	1033	3701	1000	533.3	433.3	300	166.7	433.3	366.7	333.3	300	200	466.7	100	300	33.33	66.67	0	0
593100	527300	891500	64730	3667	50270	62610	2377000	1567	1100	1967	16620	9271	66.67	833.4	2867	666.7	500	166.7	166.7	166.7	133.3	300	166.7	133.3	33.33	166.7	66.67	266.7	0	66.67	0	0
503500	431400	719600	46050	3401	42430	47930	2020000	800	1133	1767	11470	7603	166.7	566.7	2134	333.3	466.7	33.33	66.67	233.3	166.7	233.3	366.7	200	166.7	166.7	33.33	33.33	33.33	100	33.33	0
684400	392600	628600	48960	2734	32760	36310	1653000	1033	800	1533	12210	5935	66.67	400	1834	300	500	66.67	100	133.3	100	266.7	200	200	200	133.3	100	166.7	66.67	100	0	0
432100	331200	498400	32590	3167	27880	33290	1413000	700	1067	1200	8804	5602	33.33	466.7	1800	266.7	266.7	133.3	200	33.33	66.67	233.3	100	133.3	0	166.7	133.3	66.67	0	0	0	0
383300	283000	443800	32390	3234	23800	27240	1208000	766.7	1400	1967	8104	4901	166.7	633.4	1267	266.7	100	66.67	233.3	66.67	166.7	100	200	100	100	66.67	0	66.67	33.33	100	0	0
328800	214600	314400	19960	3167	18850	20760	824200	500	866.7	1800	5268	3301	33.33	233.3	1467	66.67	66.67	0	0	33.33	100	100	66.67	133.3	33.33	100	66.67	33.33	33.33	66.67	0	0
282900	142100	248800	16250	2967	13480	14380	627100	266.7	766.7	1533	3834	2334	33.33	233.3	600	100	100	33.33	0	66.67	0	133.3	100	0	33.33	66.67	33.33	0	0	100	0	0
259200	90950	153200	12540	3667	11240	9905	439300	433.3	1033	1367	2934	1800	0	66.67	233.3	33.33	233.3	33.33	33.33	0	33.33	0	33.33	33.33	33.33	0	0	66.67	0	166.7	0	0
235500	55940	107300	9739	2600	8270	7937	294000	166.7	1067	1400	1733	766.7	0	66.67	266.7	0	166.7	0	0	66.67	0	100	66.67	66.67	100	0	0	0	0	66.67	0	33.33
288100	47460	67920	6803	3501	6669	4301	203400	100	833.4	1433	1067	600	0	33.33	100	0	166.7	0	0	0	33.33	33.33	0	66.67	0	33.33	0	0	0	33.33	33.33	0
222600	29280	52080	7270	2534	5835	2867	160100	100	733.4	1400	800	666.7	33.33	66.67	133.3	0	33.33	0	0	0	0	0	0	0	33.33	0	33.33	0	0	0	0	0
206200	17050	44140	5568	3067	4568	2434	114300	66.67	766.7	1333	566.7	300	0	0	200	0	33.33	0	0	0	0	0	0	0	100	0	0	0	0	33.33	0	0
204400	16580	29450	6169	2934	3968	1433	73500	266.7	1400	1333	433.3	233.3	0	33.33	33.33	33.33	66.67	0	0	0	0	0	0	0	0	0	0	0	0	0	0	0
202700	9105	13410	5568	2867	4635	933.4	66610	33.33	966.7	1100	500	100	0	33.33	133.3	33.33	0	0	0	0	0	0	0	0	0	0	33.33	0	0	33.33	0	0
206600	7436	16920	4701	3067	4234	800	42500	100	1133	1333	233.3	66.67	0	66.67	33.33	0	0	0	0	33.33	0	0	0	0	0	0	0	0	0	33.33	0	0
198000	8971	11670	4001	2734	4034	500	37110	133.3	1033	1667	66.67	166.7	66.67	0	66.67	0	0	0	0	0	0	0	0	0	0	33.33	0	0	0	100	0	0
200000	5802	5802	4835	2900	3834	466.7	28750	66.67	833.4	1467	266.7	66.67	0	0	0	0	0	0	0	0	0	0	0	0	0	0	0	0	0	66.67	0	0
193200	5468	7903	4101	3367	3767	500	20160	133.3	800	1300	166.7	66.67	0	0	0	0	0	0	33.33	0	66.67	0	0	0	0	33.33	0	0	0	66.67	0	0
196500	3634	7536	4234	3701	3734	533.3	18450	133.3	600	1267	0	66.67	0	0	0	33.33	0	0	0	0	0	0	0	0	0	0	0	0	0	33.33	0	33.33
192400	2400	3634	4301	3034	3601	466.7	15980	166.7	1067	1133	66.67	100	0	0	33.33	0	0	0	33.33	0	0	0	0	33.33	33.33	0	0	0	0	66.67	0	0
196800	2600	8237	3934	3201	3467	266.7	11470	100	900	1567	0	66.67	0	33.33	0	0	0	0	0	0	0	0	33.33	0	0	0	0	0	0	66.67	0	0
199800	1333	2634	4134	3267	3201	66.67	14850	100	733.4	1433	133.3	0	0	0	0	0	0	0	33.33	0	33.33	0	0	0	0	33.33	0	0	0	33.33	0	0
197300	1233	5935	4501	3501	3067	300	13410	66.67	1200	1333	66.67	33.33	0	66.67	0	0	0	0	0	0	0	0	0	0	0	0	0	0	0	66.67	0	0
194600	1000	3467	4034	3034	4034	66.67	10810	100	800	1400	66.67	0	0	0	0	0	0	0	0	0	33.33	0	0	0	0	0	0	0	0	66.67	0	0
193900	1767	3301	4301	3167	3601	66.67	10840	100	666.7	1767	0	0	0	0	0	0	0	0	0	0	33.33	0	0	0	0	0	33.33	0	0	33.33	0	0
202700	633.4	3767	3467	3968	3601	66.67	12480	133.3	766.7	1433	33.33	0	0	0	33.33	0	0	0	0	0	0	0	0	0	33.33	0	0	0	0	33.33	0	0
196100	1400	2400	4401	4001	3067	300	10040	66.67	833.4	1500	33.33	0	0	0	0	33.33	0	0	0	33.33	0	0	0	33.33	33.33	0	33.33	0	0	133.3	0	66.67
192500	266.7	2867	3467	3267	3834	100	11510	133.3	900	1167	33.33	0	0	0	0	0	0	0	0	0	0	0	0	0	0	0	0	0	0	0	0	0
197900	733.4	1633	4401	2500	3667	133.3	9105	33.33	933.4	1533	0	66.67	0	33.33	0	0	0	0	0	33.33	0	0	0	0	0	0	33.33	0	0	66.67	0	0
196400	400	2467	3534	3000	3401	100	7770	33.33	900	1400	100	0	0	0	0	0	0	0	0	0	0	0	0	0	0	0	0	0	0	0	0	0
194600	333.3	1733	4234	2867	3601	100	13110	33.33	1133	1367	0	33.33	0	33.33	0	0	0	0	0	0	0	0	0	0	0	0	0	0	0	33.33	0	0
193400	400	933.4	3834	2667	4601	33.33	8804	166.7	1000	1767	0	0	0	0	0	0	0	0	0	0	0	0	0	33.33	33.33	0	0	0	0	33.33	0	0
190800	433.3	2300	4034	3501	3467	0	8537	0	866.7	1233	0	0	0	0	0	0	0	0	0	0	0	0	0	0	0	0	0	0	0	33.33	0	0
LA-map-VEMA-3 29/12/2016 12:31:08 (Run: 1)
199900	33.33	1633	4201	3201	2934	33.33	7637	66.67	800	1333	33.33	0	0	0	33.33	0	0	33.33	0	0	0	0	0	0	0	0	0	0	0	100	0	0
192900	66.67	1067	3834	2900	3968	33.33	7737	100	1367	1800	0	0	0	0	0	0	0	0	0	0	0	0	0	0	0	0	0	0	0	33.33	0	0
189400	300	1267	3934	3067	3701	66.67	7937	66.67	700	1333	0	0	0	0	0	0	0	0	0	0	0	0	0	0	0	0	0	0	33.33	0	0	0
197400	100	1333	3834	2934	4268	33.33	8504	100	800	1567	0	0	0	33.33	0	0	0	0	0	0	0	0	0	0	0	0	0	0	0	100	0	0
192300	166.7	1834	4168	3034	3201	0	8504	300	900	1567	0	0	0	0	33.33	0	0	0	0	0	0	0	0	0	0	0	66.67	0	0	66.67	0	0
195800	233.3	2067	3734	3534	3834	33.33	10510	166.7	1033	1067	33.33	0	33.33	0	0	0	0	0	0	0	0	0	33.33	0	0	0	0	0	0	0	33.33	0
196300	166.7	1167	4068	3301	3901	33.33	8571	33.33	633.4	1700	0	66.67	0	0	0	0	0	0	0	0	0	0	0	0	0	0	0	0	0	0	0	0
197300	166.7	1200	4368	3501	4234	33.33	7270	33.33	766.7	1467	66.67	0	0	0	0	0	0	0	0	0	0	0	0	0	0	0	0	0	0	33.33	0	0
196000	133.3	1500	3501	3234	3901	33.33	8537	33.33	966.7	2034	0	0	0	0	0	0	0	0	0	0	0	0	0	0	0	0	0	0	0	0	0	0
194700	333.3	1067	4568	2967	3901	0	7503	133.3	766.7	1600	0	0	0	0	0	0	0	0	0	0	0	0	0	66.67	33.33	0	0	0	0	66.67	0	0
196600	233.3	1800	3834	3401	3501	0	7103	100	1000	1467	0	0	0	0	0	0	0	0	0	0	66.67	0	0	0	0	0	0	0	0	0	0	0
197600	0	1467	3634	2867	3634	133.3	7236	33.33	1167	1700	0	33.33	0	0	0	0	0	0	0	0	0	0	0	0	0	0	33.33	0	0	0	0	0
194900	0	1300	3834	2834	3234	100	7837	0	1133	1133	0	33.33	0	0	0	0	0	0	0	0	0	0	0	0	0	0	0	0	0	100	0	0
198100	66.67	1167	3567	3267	3634	66.67	7436	66.67	633.4	1467	0	0	0	0	0	0	0	0	0	0	33.33	0	0	0	0	0	0	0	0	66.67	0	0
193500	33.33	1267	4201	3401	3201	0	7570	0	833.4	1200	33.33	0	0	0	0	0	0	0	0	0	0	0	0	0	0	0	0	0	0	66.67	0	0
193700	300	1500	3701	2900	3334	0	7470	33.33	900	1433	0	0	0	0	0	0	0	0	0	0	33.33	0	0	0	33.33	33.33	0	0	0	33.33	0	0
193000	0	900	4068	2834	3334	0	7503	33.33	566.7	1934	0	0	0	0	33.33	0	0	0	0	0	0	0	0	0	0	0	0	0	0	66.67	0	0
194500	133.3	1767	4001	3101	3167	66.67	7603	133.3	800	1333	0	0	0	0	0	33.33	0	0	0	0	0	33.33	0	0	33.33	0	0	0	0	66.67	0	0
199300	0	1233	4068	3101	3000	0	7370	0	633.4	1967	33.33	0	0	0	0	0	0	0	0	0	0	0	0	0	0	0	0	0	0	0	0	0
195800	0	833.4	3601	3201	3234	66.67	7169	33.33	866.7	2000	0	0	0	0	0	0	0	0	0	0	0	0	33.33	0	0	0	0	0	0	33.33	0	0
196200	66.67	1633	4001	3867	3234	33.33	8270	33.33	566.7	1333	0	0	0	0	0	0	0	0	0	0	0	0	33.33	0	0	0	0	0	0	66.67	0	0
200900	166.7	1200	3968	2800	3334	66.67	7303	66.67	866.7	1900	0	0	0	0	0	0	0	0	0	0	0	0	0	33.33	0	0	0	0	33.33	100	0	0
191000	100	966.7	3234	2734	3767	100	7136	133.3	1000	1267	0	0	0	0	0	0	0	0	0	0	0	0	0	0	0	0	0	0	0	0	0	0
190700	133.3	866.7	4201	3534	4334	133.3	7603	33.33	900	1300	0	0	0	0	0	0	0	0	0	0	0	0	0	0	33.33	0	0	0	0	0	0	33.33
193400	100	1433	4368	3000	3734	500	10040	33.33	666.7	1400	0	33.33	0	0	0	0	0	0	0	0	0	0	0	0	33.33	0	0	0	0	0	0	0
200100	4601	7603	4868	3067	3901	966.7	42230	100	800	1633	433.3	333.3	0	66.67	66.67	0	0	0	0	0	0	0	0	0	0	0	33.33	0	33.33	100	0	0
237500	14010	55770	7570	2867	4968	3867	108100	133.3	933.4	1700	2667	400	33.33	66.67	433.3	0	33.33	33.33	33.33	33.33	0	0	33.33	100	33.33	0	0	100	0	66.67	0	0
306800	95360	234800	22660	3501	19490	18550	782000	433.3	866.7	1533	6169	3634	33.33	333.3	900	266.7	233.3	100	33.33	66.67	0	233.3	300	266.7	33.33	100	33.33	200	0	33.33	0	0
552200	293400	793200	53460	2300	42900	49370	1854000	1600	900	1733	20390	8004	400	1167	2367	500	466.7	233.3	66.67	233.3	333.3	433.3	333.3	233.3	133.3	200	233.3	300	0	166.7	66.67	0
836000	552000	1586000	111400	3501	83950	103700	3626000	1767	966.7	2167	32960	14110	266.7	1200	4334	933.4	833.4	233.3	333.3	200	200	733.4	500	700	233.3	233.3	200	433.3	33.33	100	66.67	0
1712000	937600	2223000	118200	2867	122200	131500	4759000	3234	1167	1900	42470	20090	566.7	1700	5768	1533	1033	500	333.3	333.3	600	900	800	666.7	400	466.7	200	500	66.67	200	0	0
1208000	1155000	2591000	143200	2900	133700	153300	5967000	4168	766.7	2434	49230	26070	366.7	2100	8437	1533	1233	466.7	566.7	366.7	300	766.7	833.4	666.7	500	533.3	266.7	600	0	166.7	133.3	33.33
1359000	1294000	2546000	155800	3901	159600	164100	6988000	4434	1067	3101	52950	27980	500	2400	7670	1400	1100	500	400	666.7	633.4	800	900	1100	500	366.7	433.3	566.7	100	300	33.33	66.67
1361000	1458000	2758000	176900	3767	162500	191900	7983000	4101	933.4	2300	55640	27640	900	2167	8304	1567	1333	566.7	500	433.3	900	933.4	833.4	1067	500	666.7	300	633.4	33.33	166.7	66.67	33.33
1438000	1487000	2871000	177100	3467	169600	206700	7836000	4968	1200	2134	57950	31720	600	2234	7770	1633	1733	666.7	466.7	733.4	700	1300	1067	1033	366.7	533.3	333.3	533.3	200	100	0	0
1469000	1525000	2832000	184800	3401	170700	207500	7830000	4701	1133	2267	54730	32590	866.7	2534	8404	1267	1333	333.3	666.7	500	533.3	1300	1033	1200	300	400	566.7	766.7	66.67	266.7	33.33	66.67
1493000	1615000	2871000	192300	3801	172700	227900	8307000	4735	800	2400	60600	35670	633.4	3101	8337	1533	2300	533.3	700	600	1133	1300	1033	933.4	300	766.7	366.7	900	100	233.3	33.33	33.33
1440000	1389000	2857000	199300	4201	165000	231600	7932000	4668	1233	2234	60100	35670	933.4	3234	7403	1867	1633	800	633.4	800	966.7	1200	833.4	1167	500	533.3	200	933.4	200	166.7	166.7	0
1538000	1521000	2703000	201500	3467	173000	239500	8953000	5201	1000	2300	57980	35740	1100	2267	9205	2200	1800	700	466.7	833.4	900	1000	1167	1167	333.3	800	500	433.3	100	200	66.67	33.33
1431000	1521000	2863000	182700	4034	169700	256600	8848000	6169	1500	2167	57310	36140	500	2567	8804	1733	1900	433.3	933.4	933.4	1033	1033	1567	1367	400	700	433.3	733.4	0	266.7	66.67	33.33
1681000	1551000	2816000	185300	3601	178400	243200	9096000	5435	1300	2067	55870	36310	633.4	2500	8604	2100	1800	500	566.7	666.7	1033	1834	1500	966.7	566.7	400	533.3	933.4	100	233.3	0	66.67
1433000	1649000	2733000	214200	3401	170900	261400	8863000	4901	1667	1867	52020	39550	866.7	2634	9305	1934	1700	500	766.7	566.7	800	1233	1300	1567	666.7	600	366.7	766.7	100	366.7	33.33	33.33
1453000	1656000	2965000	193400	4301	173800	263500	8492000	5969	733.4	2434	60300	39390	500	3301	9205	2400	1900	666.7	700	766.7	1200	1600	1100	1367	533.3	766.7	500	700	66.67	433.3	0	33.33
1372000	1531000	2520000	188600	3934	162900	236400	8611000	5068	933.4	2467	53990	33360	633.4	3467	9338	1667	1700	433.3	733.4	866.7	700	1200	1200	1567	500	533.3	366.7	566.7	100	200	33.33	0
1290000	1479000	2300000	170100	3501	147500	243600	9501000	5902	933.4	2867	50770	38550	933.4	3567	9905	2134	1500	366.7	600	733.4	1100	1467	1167	866.7	766.7	933.4	233.3	666.7	166.7	300	33.33	0
1304000	1381000	2387000	174500	3367	142000	237000	9354000	5902	966.7	3234	42030	37850	966.7	2767	10670	2600	2000	600	1000	800	1033	1567	1033	1400	433.3	900	433.3	1067	66.67	266.7	0	33.33
1303000	1330000	2375000	176400	2734	138700	241900	9500000	6135	966.7	2834	49300	40020	766.7	3634	10870	2134	2000	300	766.7	666.7	1267	1633	900	1233	500	766.7	600	1100	33.33	400	33.33	66.67
1306000	1419000	2356000	183300	3934	149400	260700	9671000	6869	1300	2700	47260	40960	533.3	2700	10940	2034	2300	500	800	733.4	866.7	1533	1133	1200	400	966.7	400	1033	133.3	233.3	166.7	0
1374000	1357000	2705000	186300	3467	155300	261100	10240000	6102	1200	2600	53720	38680	866.7	3434	10010	2634	1934	366.7	800	600	700	1267	1000	1267	633.4	733.4	566.7	700	233.3	166.7	33.33	100
1298000	1424000	2542000	167500	3267	156600	240700	8787000	7236	933.4	2900	51680	33600	733.4	3201	10210	2167	1800	600	766.7	900	1000	1500	966.7	1133	466.7	533.3	600	633.4	100	266.7	33.33	33.33
1211000	1414000	2257000	179100	4134	154600	255400	9113000	5268	1167	2267	48630	37110	800	3234	9739	2100	2200	666.7	733.4	1067	1067	1733	1100	1033	533.3	666.7	266.7	800	200	300	166.7	0
1246000	1298000	2414000	160300	2800	150300	239900	8829000	5335	1133	3301	52080	39320	966.7	3968	10870	2234	2200	633.4	700	566.7	1167	1567	1300	1767	566.7	700	666.7	1067	133.3	333.3	133.3	33.33
1574000	1199000	2416000	170900	4201	145800	246500	8656000	5101	1067	3834	46450	44110	1133	4901	15310	3067	2367	966.7	833.4	1000	866.7	1467	1067	1000	466.7	966.7	700	633.4	133.3	400	33.33	33.33
1691000	1063000	2345000	146500	3834	127700	216600	8058000	6669	1067	3000	43470	41190	733.4	4701	13440	2700	2234	500	700	800	900	1233	1033	1167	433.3	866.7	266.7	666.7	133.3	266.7	0	0
1304000	974000	2440000	152400	3367	127600	221400	7720000	4968	833.4	2867	49670	37480	600	3467	13380	2334	1834	466.7	833.4	566.7	666.7	1567	1233	1100	500	600	566.7	833.4	166.7	166.7	166.7	66.67
1277000	1033000	2438000	174000	3867	129900	216000	7287000	5101	1067	3101	52020	38680	833.4	3234	10540	2300	2234	600	733.4	1000	666.7	1167	1233	900	566.7	700	366.7	766.7	133.3	200	100	0
1318000	1102000	2619000	166900	3201	143100	195600	7543000	5268	1033	2434	53960	37710	800	2967	11010	1800	2100	733.4	633.4	600	766.7	1233	1067	933.4	366.7	833.4	433.3	533.3	166.7	400	166.7	33.33
1466000	1260000	2751000	169300	3467	140500	223700	7634000	4968	800	2734	51080	38250	733.4	3134	10310	1934	1667	400	700	900	900	1633	1133	1233	600	900	533.3	733.4	66.67	366.7	66.67	33.33
1390000	1247000	2689000	163200	3334	141100	210300	7715000	4501	1500	2534	53960	34330	366.7	2934	9438	2034	1834	500	633.4	500	666.7	1167	1067	1433	266.7	633.4	366.7	700	100	233.3	100	0
1366000	1287000	2968000	171400	3401	153000	206800	6979000	4434	1000	1900	50440	31790	433.3	2300	8471	1700	1733	466.7	600	433.3	1133	1333	766.7	1133	300	533.3	466.7	800	66.67	266.7	100	33.33
1395000	1329000	2765000	167200	3467	161500	194800	6985000	4434	733.4	2267	53050	32160	600	2467	8437	1867	1633	533.3	633.4	833.4	966.7	1367	1400	1167	800	933.4	300	766.7	100	433.3	133.3	33.33
1503000	1375000	2741000	169400	3767	160300	195300	6800000	3534	966.7	2734	53690	30720	533.3	2500	9238	1267	1367	366.7	666.7	833.4	500	1267	1033	766.7	600	433.3	500	500	100	200	66.67	66.67
1249000	1537000	2677000	160100	3067	152100	182900	6908000	3701	933.4	1867	51340	28340	700	2367	7670	1233	1500	466.7	633.4	800	500	800	1133	1000	233.3	466.7	400	700	33.33	233.3	66.67	0
1240000	1411000	2538000	162500	3901	152500	182600	6673000	4034	1200	2167	51410	30050	700	2134	7370	1200	1567	700	533.3	766.7	733.4	1433	1033	1000	566.7	433.3	500	666.7	66.67	266.7	33.33	66.67
1335000	1354000	2685000	161800	3301	166700	171200	6508000	3167	1333	1967	52080	28080	366.7	2234	6669	1733	1533	266.7	466.7	666.7	666.7	1167	966.7	1167	600	600	533.3	566.7	100	200	133.3	33.33
1219000	1395000	2705000	157800	3767	151000	178300	6410000	3601	933.4	2467	52150	26740	566.7	2400	6969	1467	1567	333.3	466.7	866.7	700	1167	1233	1100	700	700	433.3	566.7	100	133.3	100	0
1289000	1424000	2678000	164900	3867	159300	170300	6685000	3201	1267	2300	50710	28080	733.4	2267	7403	1233	1834	400	666.7	700	600	1233	866.7	1333	400	733.4	333.3	400	66.67	166.7	66.67	66.67
1281000	1359000	2547000	191800	3968	160900	173300	6363000	3334	1133	2034	46590	27210	366.7	1733	7570	1633	1533	500	433.3	633.4	700	1167	800	1067	300	833.4	266.7	566.7	100	200	66.67	33.33
1373000	1415000	2525000	172800	3267	159500	181900	6782000	4401	1267	2667	53790	27680	500	2167	7436	1400	1200	533.3	433.3	666.7	900	1067	966.7	1000	433.3	433.3	366.7	700	66.67	400	66.67	0
1446000	1441000	2761000	175600	3234	159800	190700	6976000	4334	1233	2134	50810	27880	500	2067	6536	1333	1700	466.7	466.7	633.4	466.7	1400	1433	900	466.7	866.7	366.7	666.7	33.33	200	66.67	66.67
1334000	1405000	2598000	170900	3334	168700	196100	6622000	4201	966.7	2200	51280	28310	500	1934	7637	1300	1067	500	933.4	466.7	900	1067	1133	1067	500	600	233.3	566.7	133.3	200	33.33	0
1457000	1393000	2701000	168400	3501	168000	196000	7188000	3134	966.7	2234	50040	30120	733.4	2400	6702	1400	1934	766.7	466.7	766.7	800	1067	1100	866.7	333.3	600	433.3	600	166.7	266.7	0	33.33
1374000	1446000	2870000	176700	4201	178300	201700	6613000	4434	1233	2767	55700	29310	600	2267	6069	1533	1767	266.7	533.3	800	433.3	1200	1000	766.7	466.7	500	466.7	666.7	166.7	200	100	0
1268000	1581000	2652000	173700	2367	159900	193100	7190000	4101	1067	1533	54060	25440	800	1934	6803	1033	1767	466.7	600	600	900	1333	1033	1033	466.7	800	433.3	500	66.67	133.3	66.67	33.33
1338000	1832000	2505000	177100	3501	140200	183900	7408000	4068	933.4	2234	49430	27640	500	1367	6235	1000	1100	366.7	666.7	466.7	666.7	733.4	1133	833.4	400	533.3	200	366.7	33.33	133.3	33.33	66.67
1202000	1820000	2431000	153300	3767	127300	144900	6761000	4234	766.7	2134	45180	19960	300	1834	5101	1500	1067	366.7	233.3	233.3	400	1100	733.4	466.7	500	200	300	500	66.67	166.7	0	0
1177000	1734000	2579000	149800	3201	132100	127500	6253000	3834	1033	1967	51240	18550	433.3	1633	4201	1200	766.7	233.3	466.7	366.7	400	866.7	466.7	466.7	200	366.7	100	233.3	66.67	200	66.67	33.33
1140000	1716000	2698000	154300	3267	133200	113400	5588000	2834	1367	1867	49700	16920	433.3	1200	3968	900	566.7	133.3	300	433.3	200	700	566.7	500	133.3	300	233.3	233.3	66.67	166.7	0	33.33
1207000	1595000	2598000	149800	4268	123200	108200	4713000	2634	1167	2100	46250	13740	366.7	966.7	3968	1133	900	166.7	266.7	366.7	366.7	733.4	566.7	300	200	233.3	266.7	433.3	66.67	166.7	0	0
1056000	1236000	2685000	136100	3367	118900	96240	4198000	2867	1467	1667	49870	13440	300	733.4	3901	933.4	1200	200	266.7	266.7	166.7	800	566.7	566.7	200	300	166.7	333.3	66.67	33.33	66.67	0
1195000	1155000	2974000	138200	2900	125800	110100	4595000	2000	900	1834	55100	14140	266.7	1067	3801	1000	1033	200	300	333.3	300	566.7	666.7	500	333.3	533.3	66.67	400	133.3	66.67	33.33	0
1433000	1203000	3115000	157500	3301	143700	123300	4662000	3034	1100	2167	57620	18390	333.3	1800	5502	833.4	1033	500	533.3	300	600	933.4	933.4	633.4	200	533.3	500	500	100	266.7	66.67	0
1541000	1206000	3114000	189700	3101	153200	141100	5720000	3034	1100	1967	58150	20890	300	1533	5468	1067	1000	266.7	633.4	500	633.4	833.4	833.4	700	300	566.7	266.7	700	33.33	133.3	33.33	0
1560000	1259000	3049000	171400	3101	160200	150600	5743000	3801	1167	2167	58350	23200	600	1567	5802	1167	1233	366.7	666.7	1000	700	700	800	433.3	333.3	400	300	466.7	33.33	166.7	66.67	33.33
1419000	1187000	2832000	169000	3167	134900	148100	5331000	2634	1167	2100	55770	23460	533.3	1667	5735	1467	1267	300	633.4	600	633.4	900	766.7	1233	366.7	600	266.7	533.3	133.3	133.3	33.33	33.33
1430000	1148000	2707000	157300	3301	140400	143700	5672000	3968	800	1934	51080	22230	566.7	1633	5969	1200	1367	533.3	566.7	500	633.4	700	966.7	833.4	200	333.3	600	600	100	166.7	33.33	33.33
1443000	1234000	2849000	172200	3367	151700	154900	6167000	3201	1100	1233	52420	24870	533.3	1333	6169	1400	1600	166.7	466.7	500	566.7	866.7	966.7	766.7	266.7	466.7	133.3	700	33.33	100	0	66.67
1283000	1384000	2779000	174100	3901	152800	175500	6465000	3901	1100	1934	55740	26370	466.7	1834	7069	1467	1633	600	533.3	433.3	833.4	1267	800	866.7	400	566.7	400	433.3	66.67	233.3	66.67	0
1379000	1409000	2939000	178700	3367	159700	169400	6683000	3534	900	1267	55030	27370	600	1900	7903	1533	1800	200	1033	433.3	833.4	1200	1167	800	533.3	600	400	500	33.33	133.3	66.67	0
1471000	1506000	3077000	180000	3167	165200	188700	7513000	3801	800	2067	59230	30150	433.3	2700	6702	1733	1900	433.3	800	900	700	1400	900	1400	533.3	433.3	166.7	533.3	100	266.7	33.33	33.33
1546000	1552000	3019000	174100	4568	168600	190900	7428000	3567	1567	2200	60060	30080	366.7	2267	7737	1633	1767	533.3	633.4	566.7	1033	1367	800	1033	333.3	466.7	433.3	966.7	133.3	133.3	33.33	0
1458000	1500000	3111000	182400	4401	166700	189000	7248000	4068	1167	1733	53360	27740	700	2000	6402	1900	1000	500	733.4	466.7	900	1167	1000	1267	366.7	666.7	300	966.7	66.67	33.33	133.3	0
1391000	1624000	2864000	195700	3667	173900	184400	6959000	4068	1167	1767	60060	27270	566.7	1934	6336	1233	1500	366.7	400	633.4	600	1033	1300	733.4	533.3	866.7	400	733.4	33.33	133.3	100	0
1399000	1521000	2773000	168700	3801	173300	175000	6672000	4068	1000	2200	52820	27240	600	1967	6702	1300	1133	300	600	500	1133	1200	1033	1100	400	633.4	300	433.3	100	66.67	0	0
1312000	1585000	2943000	175900	3501	182500	208900	6837000	4034	1100	2434	63320	30520	366.7	1834	6736	1633	1000	366.7	466.7	766.7	700	1367	933.4	1333	600	533.3	466.7	266.7	66.67	200	66.67	0
1642000	1731000	3191000	197200	3867	194000	195800	7112000	3567	1200	1834	64230	30890	800	2434	7670	1567	1533	533.3	533.3	700	866.7	1100	1167	1067	400	433.3	300	866.7	100	333.3	100	0
1520000	1766000	3214000	188800	3701	181500	193800	7498000	4201	1133	1733	62480	31290	500	2634	8337	1500	2034	566.7	633.4	633.4	1233	1233	1067	900	233.3	700	466.7	500	166.7	233.3	33.33	33.33
1422000	1768000	3243000	188700	3701	198000	206800	7472000	3767	1333	2334	65130	34360	400	2500	7203	1934	1700	300	566.7	533.3	1067	1767	1267	800	500	800	433.3	666.7	100	233.3	33.33	0
1441000	1749000	3255000	212800	3067	187000	214900	7524000	4334	1367	2434	58620	35100	500	1967	8838	2034	1934	700	333.3	866.7	833.4	1267	1133	1067	366.7	666.7	266.7	633.4	133.3	300	200	33.33
1571000	1667000	3137000	189600	3934	187000	199700	7591000	4701	1400	2100	62550	35840	566.7	2434	9672	1900	1867	533.3	600	666.7	700	1467	1100	800	466.7	566.7	533.3	466.7	166.7	233.3	66.67	66.67
1640000	1608000	3073000	186800	4134	180500	205300	7436000	3667	1000	2234	62250	36310	700	2867	9305	2100	1267	500	733.4	766.7	866.7	1667	1233	1433	433.3	833.4	400	866.7	133.3	233.3	66.67	66.67
1607000	1552000	3249000	197800	3767	174700	198900	7715000	4701	1467	1934	66810	40590	566.7	3201	9805	1934	1867	433.3	833.4	766.7	733.4	1433	933.4	1333	433.3	766.7	566.7	433.3	200	166.7	33.33	33.33
1704000	1503000	3663000	192600	4101	172000	221900	7819000	4201	1200	1767	67280	46080	1100	4601	12170	3034	2167	666.7	966.7	1033	733.4	1400	1300	1067	600	800	533.3	966.7	66.67	266.7	33.33	100
1669000	1483000	3267000	204600	3767	164600	246700	7679000	5168	1200	2600	69430	45580	900	4768	13280	2867	2400	733.4	1000	866.7	833.4	1400	1467	1100	966.7	833.4	500	1133	66.67	366.7	200	66.67
1738000	1255000	3155000	195400	3901	158600	223400	7898000	4868	1033	2000	62750	45310	833.4	4701	14080	2734	2334	533.3	1100	766.7	1167	1934	1700	1500	666.7	833.4	333.3	1233	133.3	400	0	0
2001000	1166000	2928000	178500	3234	158500	249400	7709000	5902	1067	2400	61470	50240	1133	4268	15080	3701	2734	566.7	966.7	1167	1333	1633	1400	1500	733.4	1200	766.7	1300	166.7	533.3	100	0
1908000	1294000	3037000	200100	3934	173100	282600	8863000	5768	1233	2567	64860	52750	866.7	5101	15310	3000	3134	500	1000	1200	1333	1967	1600	2067	700	1000	800	1000	66.67	466.7	100	66.67
1707000	1366000	3424000	228800	3634	173000	318600	9221000	6569	1200	2400	59490	56070	1300	5335	17250	3968	3534	866.7	1100	1633	1567	2234	1233	2000	766.7	966.7	600	1233	233.3	333.3	133.3	100
1961000	1428000	3197000	204700	3467	186200	336400	9839000	6469	1033	2600	61510	56640	1067	4835	17050	3501	3201	833.4	1133	1100	1100	1934	1934	2167	633.4	1033	766.7	1267	33.33	300	66.67	100
1641000	1452000	3260000	215500	3934	181400	312100	9895000	6202	1400	2067	68790	55700	800	4501	15450	3334	2700	900	833.4	1300	1133	1600	1700	1867	733.4	933.4	833.4	966.7	166.7	100	166.7	33.33
1865000	1605000	3307000	209100	3267	184000	296900	9800000	6502	1100	2034	67150	46490	900	4034	14410	2700	2567	633.4	1367	766.7	1400	1500	1533	1300	833.4	1100	733.4	1100	166.7	233.3	33.33	133.3
1644000	1496000	3482000	221700	3701	193000	269900	8640000	6469	1400	2367	70440	42970	766.7	3801	12270	2400	2334	600	933.4	866.7	1100	1600	1033	1367	366.7	1000	533.3	1167	200	366.7	33.33	33.33
1700000	1603000	3347000	198900	3667	193300	245200	9325000	5035	1133	2267	68120	44070	900	4134	11670	1967	2167	600	966.7	966.7	966.7	1400	1533	1167	700	900	600	1200	200	333.3	66.67	0
1559000	1561000	3424000	190800	3267	178500	228000	7889000	4401	666.7	1700	63190	40890	766.7	3334	11970	1934	1633	666.7	566.7	800	1133	1800	1633	1667	466.7	866.7	733.4	800	133.3	300	133.3	33.33
1605000	1602000	3213000	205600	3167	190100	215800	8128000	4501	1300	2300	65700	37480	566.7	3467	10070	2100	2034	600	800	1000	1300	1300	1167	1200	500	766.7	633.4	766.7	133.3	200	133.3	33.33
1524000	1712000	3369000	199500	3767	188300	208400	7154000	3934	1167	1733	66780	37480	600	2634	9538	1533	2167	933.4	666.7	800	766.7	1300	1167	1000	733.4	800	500	833.4	100	333.3	33.33	0
1571000	1740000	3382000	192400	3934	192100	208100	7497000	4101	1533	1900	68830	36940	633.4	2867	8637	1700	1633	700	800	533.3	966.7	1733	1767	1167	466.7	533.3	433.3	766.7	100	200	33.33	33.33
1554000	1949000	3362000	192600	3501	205400	221400	7518000	4534	1100	2000	71140	38450	933.4	2500	9405	1433	2234	566.7	733.4	933.4	966.7	1467	1233	1867	433.3	633.4	166.7	633.4	33.33	433.3	200	0
1473000	1793000	3197000	219700	3901	209700	219700	8211000	5302	1100	2167	64430	41090	800	3634	11040	2134	1633	833.4	966.7	1033	866.7	1467	1533	1333	866.7	800	566.7	600	66.67	166.7	66.67	33.33
1589000	1751000	3231000	210900	3767	205700	220400	8223000	3401	1033	1567	69800	37980	666.7	3434	9572	2334	1967	366.7	966.7	1000	766.7	1500	1067	1433	566.7	933.4	700	933.4	333.3	100	100	133.3
1476000	1669000	3135000	182800	3734	189100	194800	7287000	3968	1100	1567	65070	38620	533.3	3467	8537	2100	2600	533.3	700	833.4	933.4	1267	1000	1100	800	766.7	400	700	100	133.3	66.67	0
1656000	1725000	3109000	215600	3901	210800	209000	7897000	3901	866.7	1867	67080	35440	600	2800	8904	2267	2067	633.4	800	866.7	666.7	1667	1567	1500	466.7	666.7	566.7	1067	300	166.7	0	33.33
1590000	1695000	3151000	199100	3467	187300	212100	8610000	4234	1033	1600	68560	39080	700	3000	10840	2467	1934	566.7	966.7	833.4	1133	1500	1767	1133	500	1233	833.4	1100	200	100	66.67	0
1684000	1916000	3560000	223800	3667	208600	258700	9841000	5502	1033	1900	71780	42930	800	3167	8671	1900	1467	766.7	666.7	1000	866.7	1667	1267	1233	566.7	1067	566.7	733.4	100	233.3	66.67	133.3
1781000	2042000	3736000	241700	3901	218000	272800	9438000	5335	1100	2000	70770	42400	800	3201	10910	2100	2234	433.3	1300	833.4	1300	2100	1533	1600	733.4	833.4	566.7	1033	233.3	233.3	100	100
1719000	1805000	3599000	204500	4034	195500	236200	8992000	6035	1533	1834	66780	40020	700	4034	10110	2800	1967	833.4	733.4	900	1433	1567	1467	1733	566.7	1233	733.4	1167	133.3	333.3	100	33.33
1727000	1850000	3701000	203000	3534	186100	241700	9007000	6202	1133	1900	67950	40120	833.4	3501	11140	2000	2034	500	800	1000	1267	1834	1467	1000	600	566.7	400	733.4	100	233.3	66.67	0
1428000	1460000	3123000	192700	3567	178300	228700	8422000	5468	1267	2267	58690	39490	833.4	4068	14540	1934	2734	533.3	1067	733.4	666.7	2134	1267	1133	466.7	833.4	633.4	966.7	200	333.3	0	0
1653000	1443000	2881000	186600	3467	168100	247000	8267000	6002	1100	1600	61780	34830	733.4	3867	10240	2300	2000	433.3	733.4	600	933.4	1767	1834	1300	400	800	466.7	700	0	200	0	0
1403000	1425000	2943000	178600	3401	162100	233000	7551000	5268	1267	1934	59630	36140	533.3	3234	9739	1700	2534	466.7	800	933.4	833.4	1500	1167	1500	933.4	733.4	533.3	633.4	33.33	100	33.33	33.33
1540000	1408000	2989000	185000	3968	183200	215500	8022000	4835	1333	2200	58050	34060	566.7	2800	9839	2034	1934	733.4	700	1000	1233	1233	1200	1533	633.4	666.7	433.3	766.7	66.67	133.3	100	0
1463000	1603000	3544000	198900	3601	193500	219000	7700000	4668	700	2400	68690	33290	433.3	2834	9105	2267	1800	600	700	800	800	1200	1067	1367	400	1000	266.7	533.3	133.3	66.67	0	100
1669000	1759000	3688000	229300	3234	211800	184200	7391000	4434	866.7	2367	66410	30520	566.7	2700	8204	1667	1567	433.3	633.4	800	666.7	1100	1167	1033	400	600	333.3	300	100	166.7	33.33	0
1563000	3862000	4455000	260700	3801	192200	164500	10940000	6502	966.7	3434	75080	27340	600	2467	6035	1267	1267	366.7	666.7	400	700	1333	900	866.7	300	600	266.7	666.7	66.67	333.3	0	33.33
1456000	7729000	2867000	221900	4501	120100	107800	12130000	6169	1300	3501	44640	18250	533.3	1267	4501	766.7	1233	400	333.3	366.7	433.3	466.7	400	533.3	233.3	300	300	266.7	0	66.67	33.33	33.33
825400	10080000	1737000	226200	3434	87420	71750	12500000	5602	1233	2800	26610	13240	333.3	966.7	3634	600	566.7	200	100	266.7	333.3	466.7	66.67	300	266.7	133.3	33.33	233.3	33.33	133.3	0	0
635000	6209000	1191000	147300	3201	56940	50070	8239000	3101	833.4	1733	18990	7770	200	800	2167	366.7	333.3	166.7	66.67	300	100	366.7	66.67	333.3	33.33	200	100	133.3	66.67	100	0	0
610700	4550000	956000	100600	3267	44940	40290	5644000	2300	733.4	2334	12680	8537	133.3	666.7	1500	166.7	466.7	66.67	133.3	66.67	33.33	266.7	500	100	66.67	100	100	66.67	33.33	100	33.33	0
550000	3669000	769100	86340	3701	35070	32990	5520000	2967	1400	2700	12240	10170	200	700	2067	566.7	366.7	66.67	100	133.3	233.3	466.7	100	166.7	33.33	100	100	300	0	133.3	0	0
651900	3904000	924800	113300	4068	41700	63960	6221000	2267	1267	2600	19720	23360	633.4	1000	3701	566.7	733.4	400	266.7	166.7	300	433.3	500	566.7	266.7	133.3	166.7	433.3	200	300	33.33	33.33
1094000	3222000	1325000	138900	3601	56440	95840	7905000	4068	1067	4034	27210	41430	133.3	1767	5935	866.7	1200	400	400	300	533.3	566.7	766.7	666.7	166.7	600	300	500	166.7	166.7	133.3	33.33
1323000	2684000	1720000	149900	4301	60270	118800	7698000	4134	1133	3867	28880	47420	400	2534	6569	1967	1433	566.7	433.3	533.3	466.7	1267	800	800	433.3	766.7	533.3	900	200	200	66.67	0
1155000	2050000	1424000	130800	3367	55570	110200	6254000	3201	900	4468	27640	38650	300	2100	6436	1267	1067	366.7	433.3	433.3	366.7	666.7	700	500	466.7	533.3	333.3	633.4	66.67	200	66.67	33.33
909600	1444000	1122000	107600	3434	45250	89610	6459000	2300	1300	3467	24370	35200	233.3	1934	4901	1200	1200	166.7	466.7	266.7	266.7	733.4	666.7	700	466.7	300	366.7	366.7	66.67	266.7	66.67	0
1163000	1687000	2060000	137100	4134	108600	148200	6036000	3734	966.7	3767	42530	42300	633.4	1834	6636	1400	1700	600	500	500	433.3	1167	600	1067	300	466.7	400	500	200	366.7	100	33.33
1369000	1573000	2656000	175900	3501	130900	154600	6572000	3134	833.4	3234	50340	39890	833.4	2000	6436	1667	1934	433.3	666.7	700	600	1200	1100	733.4	533.3	666.7	300	666.7	166.7	433.3	133.3	33.33
1521000	1935000	3249000	209200	4368	181200	211400	7702000	4034	1267	3134	61100	47760	833.4	2700	6836	1967	1400	666.7	600	733.4	1167	1567	1233	1233	566.7	800	666.7	1000	166.7	400	0	66.67
1726000	2306000	3858000	233600	4068	231300	260700	9548000	4468	933.4	3201	79010	56040	800	3234	10070	2267	2867	666.7	700	1033	900	1300	1500	1333	566.7	866.7	500	1133	300	300	166.7	0
1999000	2448000	3950000	251000	4134	242500	283600	10870000	5668	1100	2900	79240	50840	666.7	2667	9638	1800	2200	633.4	1167	1100	1200	1433	1333	1167	633.4	1033	700	900	233.3	333.3	33.33	33.33
1777000	2076000	3850000	240300	3067	214300	290800	9905000	6202	1700	2500	71980	44880	1167	3067	10510	2234	1834	800	400	1167	1133	1433	1633	1867	533.3	933.4	466.7	1000	166.7	366.7	100	66.67
1784000	2248000	4014000	233000	4201	218000	276400	9650000	5235	1200	1967	71010	50240	833.4	4101	11740	2567	1600	433.3	600	1167	1333	1567	1333	1267	633.4	366.7	633.4	866.7	200	266.7	133.3	66.67
1803000	2145000	3807000	238900	3767	207800	261300	9807000	5502	866.7	2500	76990	46920	1067	3534	11310	2434	2334	900	933.4	1167	1200	1934	1667	1700	566.7	1200	666.7	1100	166.7	500	100	100
2133000	1883000	3835000	241100	3834	204600	274000	10370000	5402	1033	2367	67420	46520	1167	4268	12170	2467	2000	633.4	833.4	1067	1000	1800	1633	1567	600	833.4	600	600	300	333.3	133.3	0
1714000	1790000	3688000	231800	3734	207500	310400	10970000	6702	1300	1934	73400	47290	900	4201	12980	2300	2367	966.7	1100	1400	1433	1767	1533	1567	666.7	866.7	633.4	766.7	200	233.3	33.33	33.33
1666000	1862000	3520000	221100	3601	201900	266400	9853000	5268	1100	1834	74540	42600	900	3667	11440	2834	2200	633.4	833.4	1133	1133	1567	1067	1367	666.7	1167	666.7	833.4	100	466.7	66.67	33.33
1526000	1817000	3439000	204900	3801	187200	241900	9018000	5101	1200	1800	64430	37710	1167	2867	10810	1867	1834	533.3	800	566.7	1300	1500	1333	1467	466.7	866.7	533.3	766.7	200	366.7	66.67	100
1618000	1792000	3379000	200800	4101	201300	254000	9973000	6569	1167	2434	76050	42630	766.7	4101	10540	2500	2100	866.7	933.4	766.7	1033	733.4	1733	1133	500	933.4	500	766.7	233.3	166.7	0	0
1560000	1786000	3340000	215700	4101	182400	239000	9404000	5935	1133	1800	66580	35670	666.7	3234	10140	2000	2334	533.3	966.7	600	833.4	1300	1133	1600	366.7	833.4	633.4	866.7	166.7	133.3	33.33	33.33
1459000	1645000	3130000	190400	3201	183900	209300	8487000	4434	1133	2434	59930	36770	700	2834	10840	2267	2100	600	733.4	600	866.7	1100	1367	1333	433.3	500	433.3	766.7	200	100	100	66.67
1654000	1366000	3609000	203900	3367	168700	161100	6903000	4134	1033	2167	71040	32120	466.7	3201	10340	2234	1834	366.7	800	533.3	666.7	1100	1000	733.4	533.3	466.7	300	833.4	66.67	200	233.3	0
1698000	1139000	3843000	202200	3834	178400	154300	6269000	3901	966.7	1867	70940	27340	666.7	2567	9171	1834	1467	266.7	733.4	633.4	1033	966.7	1167	966.7	300	500	466.7	566.7	33.33	333.3	33.33	66.67
1625000	1372000	3399000	221200	3134	167200	159600	7130000	3968	966.7	2067	70770	28440	466.7	2400	7370	1400	2000	366.7	533.3	566.7	666.7	1200	1433	900	300	533.3	366.7	500	0	166.7	166.7	0
1564000	1525000	3277000	177900	3267	180100	183400	7651000	4501	1100	2100	72790	28140	600	1967	7937	1767	1233	366.7	533.3	800	766.7	1133	966.7	1033	333.3	633.4	266.7	500	100	166.7	66.67	100
1424000	1559000	3065000	174700	3867	170500	171500	6566000	3734	800	2567	49230	29880	733.4	2267	7570	1067	1633	500	700	433.3	766.7	1267	1333	1033	533.3	833.4	466.7	833.4	100	200	66.67	100
1427000	1809000	2940000	186600	3701	187700	175100	6799000	4735	1267	1967	51140	31990	800	2500	7470	1400	1033	666.7	600	600	1000	900	1300	1067	533.3	833.4	266.7	566.7	66.67	133.3	33.33	33.33
1155000	1747000	2471000	169600	3767	195100	186400	7119000	4201	700	2600	48230	30020	500	2334	8738	1233	1600	700	600	666.7	866.7	933.4	1033	933.4	566.7	666.7	433.3	333.3	133.3	166.7	33.33	0
1140000	1626000	2701000	168900	3667	183100	200200	7412000	4068	766.7	1900	48900	26610	733.4	2534	7203	1500	1567	533.3	533.3	633.4	800	1267	1067	1367	433.3	633.4	200	533.3	33.33	400	33.33	0
1458000	1677000	3090000	179000	3801	184500	205900	7723000	4401	833.4	2367	59020	29650	633.4	2067	6702	2067	1500	566.7	533.3	433.3	933.4	1233	1133	700	533.3	466.7	366.7	666.7	133.3	66.67	33.33	66.67
1710000	1583000	2925000	182100	3701	178500	175100	7160000	4101	1400	2767	50610	28410	366.7	1934	7703	1867	1400	166.7	433.3	366.7	766.7	1167	1067	1067	600	400	366.7	433.3	100	200	33.33	0
1714000	1527000	2594000	163200	2667	166000	175600	7055000	2667	1233	2334	49740	28080	500	2234	6803	1433	1300	466.7	800	800	633.4	1200	1000	1267	766.7	700	366.7	833.4	66.67	166.7	0	33.33
1384000	1591000	2934000	199400	4001	178500	215500	8005000	5001	1167	3000	56040	29850	600	3134	9405	2167	1900	733.4	1000	633.4	933.4	1867	1533	1100	300	800	600	800	133.3	166.7	100	33.33
1352000	1429000	2651000	193900	3534	157000	211700	8094000	5768	1033	3167	53620	30380	933.4	3034	10240	2134	2000	666.7	1000	766.7	700	1267	1133	966.7	400	500	366.7	600	100	200	200	66.67
1454000	1203000	2702000	167300	4034	150300	248300	8796000	7470	1167	3367	53150	40160	1100	3534	12610	2334	2567	766.7	600	733.4	1033	1233	1333	1267	533.3	700	366.7	833.4	0	233.3	166.7	33.33
1402000	1166000	2581000	180200	3034	154500	202700	8257000	6202	1100	2934	55670	29510	766.7	2334	8938	2067	1533	433.3	633.4	866.7	1000	966.7	866.7	1200	666.7	666.7	533.3	333.3	133.3	366.7	66.67	33.33
1397000	1307000	2491000	164300	3067	146400	177200	7103000	4234	1400	1934	52480	27580	566.7	2367	6569	1700	1533	266.7	566.7	333.3	800	1200	800	733.4	433.3	1200	633.4	733.4	200	166.7	33.33	100
1298000	1580000	2743000	168900	3434	160100	189400	6998000	4468	1333	2400	51040	27640	333.3	2634	7603	1667	1667	500	466.7	633.4	833.4	1600	1133	833.4	700	700	566.7	600	133.3	300	66.67	33.33
1399000	1438000	2626000	184600	3367	152200	215200	8103000	5101	1100	2900	59020	41390	833.4	3634	11470	2534	1900	500	966.7	1000	966.7	2034	1100	1067	466.7	900	400	533.3	133.3	166.7	100	33.33
1396000	1415000	2423000	159300	3601	131900	210100	7650000	5001	1500	2400	48960	38480	900	3267	11170	2267	2000	766.7	866.7	566.7	733.4	1500	1600	966.7	500	966.7	533.3	800	66.67	366.7	233.3	200
1341000	1175000	2667000	179000	2900	149700	218500	8365000	5402	1233	2834	50710	37010	1067	3234	11870	2467	1900	700	500	900	800	1067	900	1333	633.4	666.7	300	833.4	166.7	366.7	0	66.67
1308000	1160000	2399000	150300	3201	148100	207800	8077000	4868	866.7	2067	52380	35070	533.3	3000	8604	2334	2000	700	1067	766.7	733.4	1300	1000	733.4	466.7	700	533.3	600	66.67	233.3	100	0
1515000	1479000	2734000	196700	3367	168500	210900	8078000	5101	1300	2767	58990	31860	966.7	3101	9638	2100	1767	266.7	800	633.4	1067	1867	900	1067	366.7	633.4	533.3	766.7	300	300	133.3	33.33
1343000	1367000	2680000	166300	3034	146900	222000	8549000	5735	966.7	2600	56410	31760	900	2900	9739	1700	1400	800	666.7	600	900	1467	1033	1000	766.7	700	366.7	700	0	266.7	0	100
1418000	1208000	2567000	165000	2367	123900	197000	7565000	5802	1433	2800	48560	27110	900	1900	8504	1867	1800	566.7	566.7	800	633.4	1433	633.4	1033	400	700	333.3	700	33.33	133.3	33.33	0
1356000	1208000	2311000	169300	3767	132700	159700	7262000	4668	1300	2434	53090	25340	566.7	1867	6436	1467	1733	433.3	466.7	500	566.7	866.7	866.7	766.7	266.7	600	266.7	633.4	33.33	233.3	0	0
1245000	1186000	2685000	146300	4168	150200	169300	6612000	3434	1100	1834	52890	21490	466.7	1500	7303	1433	1000	333.3	700	733.4	433.3	1000	533.3	700	333.3	266.7	433.3	300	33.33	100	100	33.33
1455000	1203000	3199000	169000	3267	162500	154700	5941000	3134	800	1967	63050	22190	733.4	2034	6869	1300	1600	366.7	566.7	600	766.7	1000	766.7	1067	400	800	400	500	66.67	333.3	33.33	66.67
1695000	1205000	3580000	183300	3534	185000	243500	8583000	4801	1467	2800	66980	31020	600	2567	8404	1500	1767	433.3	466.7	566.7	466.7	1167	1100	966.7	300	400	400	633.4	33.33	200	66.67	33.33
1508000	1528000	2934000	185700	3634	151900	200200	8214000	3901	1333	2934	57080	27840	700	2067	7770	1600	1467	566.7	433.3	766.7	733.4	1067	1000	1033	466.7	500	266.7	433.3	133.3	133.3	0	33.33
1534000	1541000	2696000	169000	3701	160900	184100	8289000	4868	1533	2700	61510	30350	800	2767	8604	1400	1667	466.7	433.3	600	733.4	1233	1067	1133	566.7	433.3	300	266.7	133.3	133.3	33.33	0
1199000	1096000	2341000	145000	3034	131300	170100	6477000	3734	1200	2400	51010	29410	466.7	2967	9004	1800	1333	366.7	833.4	633.4	466.7	1600	866.7	1133	266.7	766.7	300	466.7	133.3	233.3	33.33	0
1524000	1458000	2791000	182900	3667	150900	206700	7301000	4168	1100	2734	45210	29610	466.7	2634	8838	1533	1467	566.7	666.7	533.3	866.7	800	633.4	733.4	500	400	200	166.7	33.33	466.7	33.33	33.33
752200	626500	1279000	81060	3167	65070	85030	3277000	1967	600	2400	20690	11940	166.7	1100	2667	466.7	700	300	466.7	233.3	200	466.7	266.7	266.7	266.7	133.3	100	200	33.33	66.67	0	33.33
552100	463900	867300	53790	3267	51340	61040	2298000	1467	1133	1733	14680	8137	166.7	700	2467	533.3	500	200	233.3	100	333.3	300	400	400	100	233.3	100	133.3	33.33	66.67	33.33	33.33
507200	404500	670500	50770	3867	44170	46020	1912000	1067	1133	2234	15510	7670	133.3	500	2034	533.3	266.7	133.3	266.7	166.7	233.3	300	266.7	200	66.67	133.3	33.33	66.67	0	66.67	66.67	33.33
495800	350200	591800	39180	3534	35200	45580	1605000	600	800	1600	10970	6969	133.3	533.3	1433	233.3	333.3	66.67	100	166.7	100	233.3	366.7	33.33	0	100	200	166.7	0	100	66.67	0
497000	287100	478400	37850	3401	35940	35400	1409000	800	1400	1733	10070	4968	100	333.3	1467	300	200	100	166.7	66.67	266.7	300	300	100	0	100	100	66.67	0	66.67	0	0
367700	217100	431200	26770	3367	27270	29250	1205000	633.4	1033	1867	6369	4168	0	300	1100	166.7	300	0	100	133.3	66.67	233.3	100	166.7	133.3	66.67	33.33	33.33	66.67	33.33	33.33	0
310700	171900	294800	21690	2467	20660	19420	777700	633.4	966.7	1567	5502	2867	66.67	166.7	700	333.3	133.3	0	133.3	33.33	33.33	66.67	0	133.3	0	33.33	33.33	33.33	0	0	0	0
271600	118500	226600	17950	2734	15480	14310	544600	333.3	833.4	1267	3534	1600	33.33	200	600	133.3	133.3	0	33.33	0	133.3	133.3	0	0	33.33	0	33.33	100	0	66.67	0	0
255700	85230	152200	13540	2567	10870	8738	412100	166.7	700	1433	2267	1367	66.67	200	433.3	33.33	133.3	0	0	100	0	33.33	0	66.67	33.33	0	0	0	0	66.67	33.33	0
239700	59560	103700	10340	2900	7670	7470	276400	466.7	1000	1233	1800	1267	33.33	133.3	433.3	33.33	0	0	0	0	66.67	100	0	0	33.33	0	0	0	33.33	33.33	33.33	0
219200	39150	67920	7703	4268	7536	5835	222400	133.3	1400	1733	1700	700	33.33	133.3	200	33.33	33.33	0	33.33	0	0	0	0	0	0	0	0	33.33	0	0	0	0
214500	28410	59930	7303	3301	6436	4735	140800	300	1033	1834	700	800	0	0	100	66.67	0	0	66.67	0	33.33	66.67	0	0	0	0	0	33.33	0	0	0	0
215700	25070	35000	5402	2900	5201	2500	112600	233.3	933.4	1467	600	300	0	33.33	166.7	100	33.33	0	0	0	0	66.67	33.33	33.33	66.67	0	0	0	0	33.33	0	33.33
197500	16480	29380	5635	2900	5335	1233	81600	66.67	900	1567	366.7	266.7	0	33.33	33.33	33.33	0	0	0	0	0	0	0	0	33.33	0	0	0	0	33.33	0	0
200100	9371	20320	5668	2900	4168	2000	72150	66.67	966.7	1667	366.7	233.3	0	66.67	0	0	0	0	0	0	0	0	0	0	0	0	0	0	0	33.33	0	0
196900	8671	14650	4935	3167	4034	1100	47490	100	933.4	1600	233.3	300	0	0	33.33	33.33	0	0	33.33	0	0	0	0	0	0	0	0	0	0	0	0	0
194900	6202	13610	4334	3534	3767	500	37010	100	700	1633	133.3	66.67	0	0	33.33	0	0	0	0	0	0	0	66.67	0	0	0	33.33	0	0	0	0	33.33
192800	3701	10110	4201	3367	4101	666.7	26270	66.67	900	1233	166.7	166.7	0	0	33.33	0	33.33	0	33.33	66.67	0	0	0	33.33	0	33.33	66.67	0	0	33.33	0	0
193100	2734	10210	3867	3501	3801	500	29350	100	933.4	1433	166.7	100	0	33.33	0	0	0	0	66.67	0	0	0	33.33	0	0	0	0	0	0	66.67	0	0
199000	2134	6569	3968	3101	3767	700	24900	100	933.4	1700	166.7	133.3	0	33.33	0	0	0	33.33	0	0	0	0	0	33.33	0	0	33.33	0	0	0	0	33.33
187800	2167	6402	4268	2634	3934	433.3	16820	33.33	1033	1633	33.33	100	0	0	66.67	0	0	0	0	0	0	33.33	0	0	0	0	0	0	0	33.33	0	0
191200	800	7169	4434	2567	4034	366.7	18790	66.67	833.4	1567	33.33	66.67	0	66.67	0	0	0	0	0	0	0	0	0	0	0	0	0	0	0	66.67	0	0
186500	1133	4234	4301	3934	3034	233.3	15350	0	966.7	1133	33.33	66.67	0	0	0	0	0	0	0	0	0	0	0	0	33.33	0	0	0	0	66.67	0	0
195200	1867	3634	3801	2867	3467	200	15210	0	1000	1233	0	0	0	0	0	0	0	0	0	33.33	0	0	0	0	33.33	0	0	0	0	33.33	0	0
195000	1467	4901	4134	3167	3667	66.67	13640	0	700	1867	66.67	66.67	0	0	33.33	0	0	0	0	0	0	0	0	0	33.33	0	0	0	0	133.3	0	0
192700	1733	4201	3601	2900	3167	166.7	10410	0	966.7	1467	100	66.67	0	33.33	0	0	0	0	0	0	0	0	0	0	33.33	0	33.33	0	0	100	0	0
188300	466.7	3167	3634	4001	2934	66.67	10470	166.7	1067	1733	0	33.33	0	33.33	0	0	0	0	0	0	0	0	0	0	0	0	0	0	0	33.33	0	0
189600	400	2667	4001	2767	2734	100	10210	33.33	733.4	1533	66.67	0	0	0	0	0	0	0	0	0	0	0	0	0	0	0	0	0	0	66.67	0	0
194200	1433	1333	3401	3334	3467	33.33	10370	166.7	1033	1633	66.67	0	33.33	33.33	0	0	33.33	0	0	0	0	0	0	0	0	0	0	0	0	33.33	0	0
192800	0	2000	3301	2934	3434	66.67	11040	133.3	866.7	1800	33.33	0	0	0	0	0	33.33	0	0	0	0	0	0	0	0	0	0	0	0	66.67	0	0
190200	66.67	1667	3734	3334	3401	166.7	8437	133.3	833.4	1400	33.33	0	0	0	0	0	0	0	0	0	0	0	0	0	33.33	0	0	0	33.33	66.67	0	0
189900	166.7	1733	3601	2600	3501	33.33	9705	33.33	833.4	1700	0	0	0	0	0	33.33	0	33.33	0	0	0	0	0	0	0	0	0	0	0	66.67	0	33.33
187800	366.7	2167	3901	3534	3234	133.3	7903	33.33	900	1267	0	0	0	0	0	0	0	0	0	0	0	0	0	0	0	0	0	0	0	33.33	0	0
187600	200	1967	3434	2734	3467	33.33	6636	33.33	966.7	1600	66.67	0	0	33.33	0	0	0	0	0	0	0	0	33.33	0	0	33.33	0	0	0	0	0	0
LA-map-VEMA-4 29/12/2016 12:35:09 (Run: 1)
197000	566.7	1167	3234	3234	3167	33.33	6869	0	866.7	1233	33.33	0	0	0	0	0	0	0	0	0	0	0	0	0	0	0	0	0	0	33.33	0	0
192400	66.67	1533	4301	3434	3601	66.67	7637	66.67	1033	1567	0	0	0	33.33	0	0	0	0	33.33	0	0	0	0	0	0	0	0	0	0	33.33	0	0
194000	233.3	1367	3901	2900	3267	66.67	9071	100	1067	1433	0	0	0	66.67	0	0	0	0	0	0	33.33	0	33.33	0	0	0	0	0	0	0	33.33	0
195200	66.67	2567	4034	2667	3334	66.67	10170	0	833.4	1433	33.33	0	0	0	0	0	0	0	0	0	0	0	0	0	33.33	0	0	0	0	33.33	0	0
192900	300	1133	4401	3501	2900	100	7503	66.67	1000	1700	0	0	0	0	0	0	0	0	0	0	0	0	0	0	0	0	66.67	0	0	33.33	0	0
197900	133.3	1000	4334	3101	3934	66.67	8070	133.3	1167	1700	66.67	0	0	0	0	0	0	0	0	0	0	0	0	0	0	0	0	0	0	0	0	0
191800	133.3	1167	4368	2700	3601	100	8637	33.33	1367	1533	0	0	0	0	0	0	0	0	0	0	0	0	33.33	0	0	0	33.33	0	0	33.33	0	0
185700	100	866.7	3467	2967	4034	33.33	8838	100	933.4	1433	33.33	0	0	0	66.67	0	0	0	0	0	0	0	0	0	0	0	0	0	0	33.33	0	0
190100	33.33	1133	3201	3267	3467	0	7503	100	733.4	1200	33.33	0	0	0	0	0	0	0	0	0	33.33	0	0	0	0	0	33.33	0	0	0	0	33.33
189800	133.3	1033	4134	2734	3367	100	7637	0	800	1567	0	0	0	0	0	0	0	0	0	33.33	0	0	33.33	0	33.33	0	0	0	0	33.33	0	0
188900	166.7	1067	4168	2700	4134	66.67	7169	0	866.7	1800	33.33	0	0	0	0	0	0	0	0	0	0	0	0	0	0	0	0	0	0	33.33	0	0
186600	0	900	4301	3867	4034	33.33	8170	133.3	800	1133	0	0	0	0	0	0	0	0	0	0	0	33.33	0	0	0	0	0	0	0	0	0	0
190000	66.67	1100	4101	3601	4468	100	7136	33.33	733.4	1700	33.33	0	0	0	0	0	0	0	0	0	0	0	0	0	0	0	0	0	0	0	0	0
187600	166.7	1333	4034	3000	4534	66.67	9305	33.33	800	1533	0	0	0	0	0	0	0	0	0	0	0	0	0	0	0	0	0	0	0	33.33	0	0
191300	166.7	1133	4735	3167	5035	100	8070	66.67	933.4	1267	0	0	0	0	0	0	33.33	0	0	33.33	0	0	0	33.33	33.33	0	0	0	0	66.67	0	0
196200	33.33	900	3734	3034	4201	133.3	7903	33.33	866.7	1133	0	0	0	0	66.67	33.33	0	0	0	0	0	0	0	0	0	0	0	0	0	33.33	0	0
191600	100	1267	3901	2967	3934	66.67	6836	33.33	1100	1233	0	0	0	0	0	0	0	0	0	0	0	0	0	0	0	0	0	0	0	33.33	0	0
191400	133.3	1500	4301	2500	4101	0	8104	33.33	933.4	1467	0	0	0	0	0	0	0	0	0	0	0	0	0	0	0	0	0	0	0	66.67	0	0
189500	66.67	1200	3701	3201	3634	0	8170	66.67	766.7	1100	0	0	0	0	0	0	0	0	0	0	0	0	0	0	0	0	33.33	0	0	100	0	0
194100	100	1233	3467	3000	4468	33.33	7503	33.33	800	1867	0	0	0	0	0	0	0	0	0	0	0	0	0	0	0	0	0	0	0	66.67	0	0
200400	66.67	1333	3601	3467	4468	0	8004	66.67	966.7	1233	0	0	0	0	0	0	0	0	0	0	33.33	0	0	33.33	0	0	0	0	0	100	0	0
190100	0	1367	3667	3334	3701	200	13840	33.33	933.4	1233	33.33	0	0	33.33	0	0	0	0	0	0	0	0	0	0	33.33	0	0	0	0	0	0	0
191300	100	1233	3567	3501	4601	66.67	7870	33.33	900	2034	33.33	0	0	0	0	0	0	0	0	0	0	0	0	0	0	0	33.33	0	0	100	0	0
192800	33.33	1067	3834	3434	4134	0	7737	133.3	766.7	1834	0	0	0	33.33	0	0	0	0	0	0	0	0	0	0	0	0	0	0	0	100	0	0
195500	100	1367	4901	3000	4968	33.33	7370	33.33	1000	1934	0	0	0	0	0	66.67	0	0	0	0	0	0	33.33	0	0	0	0	0	0	0	0	0
199500	6736	14080	4868	3201	4334	1100	73260	200	800	1400	1367	433.3	0	33.33	133.3	0	0	0	0	0	0	33.33	0	33.33	0	0	0	33.33	0	0	0	0
219800	48190	110100	11070	2567	10970	7436	253000	200	500	1467	2534	500	33.33	133.3	100	33.33	200	0	66.67	0	0	166.7	33.33	33.33	0	66.67	33.33	0	0	33.33	0	0
558500	116000	235100	23530	2700	18180	20760	702100	466.7	933.4	1167	6936	2767	133.3	300	1133	233.3	433.3	100	100	66.67	166.7	200	66.67	200	133.3	100	66.67	100	33.33	66.67	33.33	0
451100	352000	725300	44040	3067	47260	57280	1855000	1300	966.7	1767	18990	8804	133.3	633.4	2067	466.7	400	166.7	166.7	333.3	333.3	366.7	366.7	333.3	166.7	200	200	300	33.33	66.67	0	0
778700	758900	1395000	88900	3501	91360	106700	3770000	2034	866.7	2034	29180	16150	133.3	933.4	5001	666.7	800	166.7	300	333.3	333.3	700	833.4	666.7	100	300	366.7	366.7	66.67	166.7	0	0
1073000	1106000	1881000	140500	3000	131800	142900	5325000	3801	1033	2400	38310	23100	233.3	1967	5969	1400	1367	466.7	533.3	600	833.4	1033	1000	900	700	733.4	333.3	300	33.33	200	33.33	0
1273000	1173000	2243000	157000	3601	141100	168800	6762000	4401	1233	2467	44270	28080	366.7	2434	7937	1800	1633	300	666.7	633.4	600	1133	866.7	1333	433.3	533.3	500	433.3	33.33	100	33.33	100
1477000	1263000	2554000	157600	3767	148300	192000	7757000	5302	1133	2634	48230	30180	800	3201	9805	1867	1934	833.4	533.3	866.7	966.7	1767	1500	700	433.3	633.4	566.7	566.7	100	166.7	100	100
1341000	1385000	2556000	183200	3167	150700	209900	8347000	5135	1167	2667	47830	33900	633.4	3567	10240	1333	1867	500	766.7	700	1033	1300	1200	1367	500	833.4	600	900	133.3	200	0	33.33
1789000	1453000	2713000	181100	4234	154300	224900	8379000	5835	900	3167	54030	32090	566.7	2834	9472	1800	1900	633.4	433.3	766.7	733.4	1267	1367	1233	600	966.7	433.3	600	166.7	333.3	100	0
1423000	1563000	2919000	186000	3401	170800	214300	8892000	5902	900	3167	48660	34400	666.7	2700	8237	2234	2367	600	800	333.3	966.7	1567	1167	1367	700	533.3	733.4	833.4	166.7	266.7	33.33	66.67
1473000	1732000	2758000	185600	3367	164000	218700	9093000	6569	733.4	2700	52050	31090	833.4	2434	7570	1733	1233	333.3	600	700	933.4	1500	1067	1300	466.7	1067	666.7	733.4	33.33	200	100	100
1339000	1800000	2859000	219800	3367	179400	214000	8616000	5168	1133	2567	50510	31320	666.7	2467	8504	2034	1967	700	700	566.7	1167	1467	1200	1433	400	866.7	533.3	533.3	66.67	33.33	66.67	0
1454000	1793000	2812000	190400	3167	184700	234100	8733000	4334	833.4	2600	51710	33730	700	2667	7603	1767	2067	766.7	700	866.7	833.4	1400	1300	866.7	566.7	966.7	500	666.7	66.67	300	100	66.67
1432000	1930000	2629000	216300	3634	179800	240200	8588000	4801	900	2234	55840	37910	700	3034	11140	2200	1667	500	966.7	666.7	1033	1767	1867	1467	566.7	800	566.7	666.7	66.67	100	33.33	0
1461000	1933000	2684000	187200	3367	186700	241200	9247000	5302	1533	2534	54560	37480	400	2834	9972	1633	1633	700	700	666.7	833.4	1900	1533	1033	600	600	233.3	766.7	100	266.7	0	66.67
1326000	1863000	2674000	187800	3734	181300	227100	8185000	4534	1333	2567	54330	36370	1133	2734	10170	1800	1900	700	800	766.7	666.7	1400	1433	1233	400	666.7	566.7	733.4	100	133.3	66.67	0
1315000	1752000	2500000	191600	3034	168300	211500	8077000	5068	1100	2167	52990	34300	433.3	2634	9171	1767	2100	766.7	1100	900	1000	1633	1100	1267	633.4	800	266.7	833.4	0	133.3	0	66.67
1335000	1596000	2522000	165500	3834	176900	197700	7603000	4801	1367	1934	55000	30990	366.7	2034	7937	1667	1600	833.4	533.3	766.7	800	1667	900	1133	500	766.7	866.7	366.7	66.67	166.7	133.3	100
1376000	1504000	2418000	169800	3534	165800	204200	7760000	4101	1033	3367	56740	33830	566.7	2600	8871	1800	2267	500	600	666.7	866.7	1200	1133	1267	533.3	833.4	466.7	900	100	233.3	100	0
1481000	1481000	2530000	172100	3401	156900	215200	8405000	4668	1333	2100	62180	35900	733.4	3067	10170	2300	1700	466.7	533.3	966.7	800	1400	1167	900	333.3	766.7	433.3	600	100	266.7	100	66.67
1565000	1463000	2669000	191200	3901	160300	217900	8777000	5768	1067	2634	61570	37240	866.7	3968	10640	1934	1900	666.7	800	666.7	700	1500	1233	1133	1000	766.7	233.3	700	133.3	266.7	100	33.33
1479000	1491000	2696000	184400	3567	165100	225400	8788000	5168	1200	2500	60870	36210	1000	3067	10540	2500	1834	866.7	566.7	866.7	966.7	1167	1433	1400	800	433.3	400	633.4	166.7	233.3	66.67	0
1852000	1430000	3034000	186200	3234	156500	258000	9249000	6235	1667	3101	60100	36470	566.7	3734	12680	1733	1800	766.7	1067	1033	733.4	1400	900	1600	466.7	533.3	600	700	133.3	366.7	100	33.33
1431000	1422000	2746000	181200	3301	145200	242300	9152000	6402	1367	2734	60970	37850	533.3	2634	11670	2667	2034	633.4	900	600	1467	1400	1200	1167	433.3	533.3	500	500	166.7	266.7	100	0
1247000	1268000	2576000	159600	3467	142900	240100	9529000	6336	966.7	2634	48930	39550	1000	3701	10440	1934	1834	1000	633.4	766.7	1467	1367	1300	1300	666.7	566.7	300	766.7	66.67	300	200	0
1325000	1248000	2248000	164700	4168	144600	271900	10180000	6669	1267	3334	55270	42030	1033	3701	12170	2334	2034	833.4	800	800	1167	1767	1667	1200	433.3	600	600	700	166.7	166.7	100	66.67
1394000	1287000	2537000	175300	3334	148700	291200	10410000	7336	1200	3167	55200	43200	733.4	3968	11340	2434	2367	833.4	766.7	1067	1267	1633	1367	1667	600	700	566.7	933.4	200	300	100	33.33
1384000	1324000	2719000	187200	3434	169200	253800	9518000	6669	900	3101	53320	37580	1067	3534	13010	2767	2067	633.4	666.7	800	800	1467	1300	1067	600	566.7	300	366.7	166.7	433.3	100	100
1421000	1322000	2707000	169400	3501	169800	246900	8622000	6202	1233	3101	52990	35900	733.4	2634	10340	2400	1800	533.3	533.3	633.4	633.4	1433	1233	1100	466.7	933.4	433.3	600	100	500	66.67	33.33
1454000	1318000	2811000	173200	3467	159500	223300	7992000	4534	1100	2700	53830	35100	933.4	3167	10340	2067	1800	200	933.4	966.7	866.7	1467	933.4	1333	666.7	900	533.3	633.4	166.7	100	33.33	33.33
1419000	1161000	2953000	171400	3601	149600	192000	7813000	4735	1033	2100	55470	33960	766.7	2967	8804	1700	1767	766.7	533.3	900	700	1400	1167	1133	300	733.4	566.7	733.4	100	266.7	100	0
1360000	1100000	2848000	153700	3934	158000	200200	7175000	4001	1267	2267	55270	31960	633.4	2067	8671	1400	1733	533.3	500	433.3	633.4	1167	1167	666.7	400	566.7	366.7	766.7	66.67	266.7	100	66.67
1361000	1171000	2860000	165100	3134	156000	189600	6756000	4501	866.7	2167	56980	32020	500	3067	8237	1400	1467	533.3	700	500	600	1500	1200	1067	633.4	500	566.7	566.7	166.7	266.7	66.67	66.67
1277000	1286000	2913000	188300	3201	160300	204400	7083000	4001	1267	2334	57480	31960	400	2467	8838	1467	1900	800	566.7	800	733.4	1567	866.7	1167	300	400	400	833.4	100	200	66.67	0
1446000	1380000	2796000	189300	2900	160200	210200	7469000	4801	800	1733	54290	32790	633.4	2467	9171	1467	1567	400	600	500	600	1500	1100	866.7	466.7	533.3	200	700	0	133.3	100	33.33
1393000	1420000	2681000	173000	4501	165000	206500	7774000	4601	800	2267	55600	33090	500	2734	8170	1900	1667	433.3	900	633.4	766.7	1433	1200	1600	433.3	533.3	400	700	66.67	266.7	66.67	0
1308000	1432000	2669000	208200	3434	168600	207500	7634000	4601	1200	2400	56780	32830	600	3101	8037	1900	1367	433.3	533.3	666.7	700	1267	1300	900	500	500	466.7	533.3	166.7	200	100	100
1354000	1522000	2943000	193400	3867	168600	213700	7515000	3901	1133	3101	55200	37080	433.3	2867	8938	1500	1867	733.4	533.3	766.7	766.7	1400	1167	1067	466.7	633.4	366.7	766.7	66.67	266.7	66.67	0
1366000	1447000	2675000	165100	3267	164400	202200	7274000	4001	1267	2934	55640	30280	800	2234	8137	1433	1233	533.3	900	700	766.7	1233	1200	900	533.3	566.7	400	833.4	133.3	400	33.33	33.33
1438000	1356000	2617000	158900	3167	158800	183300	6857000	4601	633.4	2134	53860	31150	533.3	2400	7270	1767	1467	566.7	433.3	600	1000	1467	933.4	1000	566.7	600	700	566.7	100	166.7	133.3	33.33
1463000	1355000	2675000	167100	3667	159000	193000	6526000	3501	1200	2200	54090	26670	333.3	2000	7169	1834	1633	466.7	733.4	633.4	833.4	1333	1067	566.7	366.7	500	600	566.7	100	200	100	33.33
1543000	1339000	2693000	157300	2834	155300	179600	6533000	4401	1167	1934	56110	27740	666.7	2700	7069	1433	1500	533.3	566.7	733.4	1000	1133	833.4	1100	500	433.3	466.7	600	100	233.3	100	66.67
1388000	1326000	2845000	165100	3134	165600	188600	7393000	3867	900	2534	56070	29550	666.7	2200	7169	1533	1567	466.7	600	800	900	1200	1100	866.7	433.3	533.3	333.3	666.7	66.67	266.7	33.33	33.33
1394000	1304000	2853000	166400	3767	153100	194800	7275000	4268	1467	2534	56810	32190	666.7	2400	9271	1700	1400	266.7	533.3	500	866.7	1033	1000	1000	600	566.7	400	666.7	100	133.3	0	66.67
1285000	1275000	2626000	161300	3901	153300	192600	7655000	4434	900	2600	54060	31720	633.4	2967	8504	1934	1500	700	833.4	500	1033	1100	933.4	1100	666.7	733.4	600	866.7	66.67	333.3	100	33.33
1705000	1219000	2626000	170000	2834	148300	196500	7211000	4334	1167	2900	53960	32420	533.3	2434	8404	1967	1967	833.4	500	1033	800	1433	1100	966.7	533.3	433.3	500	733.4	100	166.7	0	100
1373000	1350000	2538000	170200	3934	141300	194800	7786000	4568	1200	2500	46320	34030	566.7	2967	9205	2034	1800	366.7	400	700	866.7	1400	1133	1367	633.4	600	200	633.4	0	233.3	100	66.67
1498000	1596000	2430000	185300	3167	131700	217100	8898000	5802	733.4	2834	46950	34330	633.4	3801	10440	2200	1733	566.7	700	766.7	800	1533	1267	966.7	466.7	433.3	466.7	500	166.7	100	33.33	33.33
1274000	1865000	2386000	174600	4068	128500	205900	8316000	6035	1233	2600	45350	33960	800	2867	10240	2067	1733	466.7	1067	733.4	900	1333	1167	1267	633.4	766.7	266.7	766.7	33.33	400	100	33.33
1719000	2140000	2414000	190000	4168	130400	236900	9504000	6569	833.4	2500	47930	35270	1033	3567	11870	2234	1733	633.4	633.4	633.4	866.7	1333	933.4	1000	466.7	433.3	433.3	633.4	100	133.3	100	0
1510000	2256000	2296000	159200	4068	104500	211600	8527000	5235	1267	2400	39490	35770	600	3901	8971	1900	1667	433.3	433.3	666.7	833.4	1433	766.7	866.7	366.7	600	366.7	833.4	233.3	433.3	0	0
1411000	2130000	2281000	173900	3401	101800	206500	8878000	5735	1000	2234	42500	36370	566.7	3734	10510	1667	2000	400	766.7	600	1400	1467	1033	1333	333.3	800	366.7	566.7	200	366.7	0	0
1376000	1897000	2106000	168700	4301	117400	204400	8261000	6135	1033	3134	47690	38780	733.4	4201	11210	1700	1934	633.4	666.7	933.4	800	1200	966.7	1167	533.3	766.7	466.7	766.7	233.3	333.3	66.67	166.7
1844000	1656000	2557000	165200	3234	141300	230200	7969000	5001	1100	2734	45250	35640	833.4	3101	11770	1967	2100	733.4	733.4	633.4	600	1133	1033	1433	500	566.7	533.3	500	100	266.7	133.3	66.67
1345000	1599000	2561000	170300	4334	141700	197800	7315000	4901	1067	3267	47690	35740	766.7	3734	10110	2434	2267	533.3	466.7	1000	533.3	1500	1133	1267	433.3	400	400	666.7	33.33	166.7	0	33.33
1372000	1536000	2683000	186200	4034	154900	215100	7188000	4668	1167	2634	50940	35500	466.7	2800	9672	2134	1967	333.3	733.4	466.7	1000	1233	800	1267	533.3	500	366.7	666.7	166.7	100	33.33	0
1836000	1644000	3008000	182900	3734	157100	213700	7035000	4168	733.4	3267	53660	33530	733.4	2800	8671	1633	1600	500	466.7	800	933.4	1400	1367	1267	433.3	600	400	700	66.67	266.7	100	33.33
1402000	1529000	2763000	175700	3767	158200	203600	6793000	3201	1267	2734	51040	32790	633.4	2200	8270	1200	1934	333.3	566.7	833.4	500	1167	933.4	1167	533.3	666.7	266.7	500	66.67	233.3	133.3	0
1325000	1475000	2652000	153100	3201	149200	188200	6218000	3968	1000	2600	51240	30650	600	2500	8237	1633	1767	400	566.7	466.7	700	700	1033	1000	333.3	433.3	466.7	800	66.67	300	100	66.67
1406000	1604000	2627000	162400	4034	159100	190100	6778000	3467	1200	3034	49970	32090	466.7	2334	6169	1633	1533	666.7	600	566.7	766.7	1300	1033	966.7	400	900	200	666.7	66.67	233.3	33.33	33.33
1342000	1530000	2717000	181500	3801	165500	183600	6627000	3434	1300	2234	55700	28280	633.4	2267	7970	1834	1767	700	533.3	833.4	733.4	1167	1000	833.4	733.4	1067	300	700	0	266.7	33.33	0
1387000	1711000	2918000	183300	3167	182700	210000	7305000	3834	1467	2234	59020	33230	666.7	1834	7436	1267	1900	466.7	666.7	666.7	633.4	1367	933.4	1133	500	700	566.7	533.3	200	233.3	0	33.33
1547000	1632000	3150000	186400	3434	169500	208700	7344000	5168	1300	2700	62510	31520	833.4	2067	6602	1934	1400	500	700	433.3	600	1400	1033	833.4	600	700	300	900	233.3	200	33.33	33.33
1467000	1570000	2901000	193700	3467	182400	200200	7341000	4301	1167	2800	58150	30990	733.4	2367	7069	1633	1900	333.3	666.7	566.7	633.4	1300	933.4	1000	366.7	533.3	533.3	633.4	33.33	300	100	0
1440000	1658000	3346000	190100	3834	191600	204600	8201000	4201	1233	2334	58760	32290	666.7	2267	8270	1467	2000	300	633.4	466.7	733.4	1167	1167	1000	166.7	766.7	266.7	600	66.67	166.7	200	33.33
1413000	1674000	3159000	193100	3367	177400	210800	7078000	4168	1100	2234	60800	30350	466.7	2467	6936	1834	1767	466.7	800	900	933.4	1633	1167	1233	533.3	700	433.3	900	66.67	166.7	66.67	33.33
1585000	1725000	3402000	197100	3867	197000	202000	7486000	3767	1300	2300	60770	30380	633.4	1967	7336	1633	2100	600	566.7	800	833.4	1333	1033	933.4	500	566.7	533.3	733.4	166.7	166.7	0	66.67
1497000	1733000	3320000	190200	3334	189500	214400	7676000	3734	1033	2300	58720	34400	433.3	2134	9038	1834	1633	633.4	533.3	400	633.4	1133	833.4	1267	566.7	1000	500	700	133.3	166.7	0	0
1497000	1707000	3305000	193400	3634	207300	215700	7464000	3968	1200	2300	66240	34870	600	2500	9071	2134	1500	500	700	833.4	766.7	1067	1367	1067	566.7	533.3	700	600	66.67	233.3	100	0
1705000	1820000	3460000	233300	2800	201600	249300	8358000	4901	1033	2167	64630	37710	466.7	3000	9772	1800	2400	333.3	933.4	766.7	900	1800	1300	1333	433.3	600	533.3	600	133.3	133.3	100	0
1488000	1657000	3216000	192000	4168	187600	237700	8350000	4835	1200	2667	66070	37110	500	2667	8471	2334	1667	733.4	600	433.3	866.7	1533	1200	1067	600	1200	566.7	600	266.7	166.7	66.67	33.33
1530000	1601000	3302000	201300	3634	175800	250500	8427000	5535	1033	2167	65070	38550	766.7	3467	9772	2234	2167	666.7	666.7	866.7	733.4	1767	1133	1467	266.7	733.4	500	566.7	33.33	366.7	133.3	100
1581000	1570000	3233000	214700	4134	182300	273300	9086000	5935	966.7	2800	62750	44310	833.4	3301	11940	2300	1867	533.3	900	1100	1233	1233	1433	1767	800	866.7	533.3	1033	66.67	133.3	66.67	0
1657000	1543000	3297000	201800	3301	182800	285800	9805000	5902	1067	2334	73030	45040	733.4	3767	12340	2767	2234	466.7	800	1133	766.7	1467	1433	1767	500	900	366.7	1133	366.7	266.7	66.67	100
1746000	1622000	3398000	208900	3968	187200	276800	10050000	6002	1067	2667	66480	48090	733.4	3401	12880	3067	2300	900	966.7	1067	1267	1733	1533	1333	666.7	800	633.4	1100	266.7	533.3	100	133.3
1576000	1621000	3152000	219400	3968	175700	270900	9580000	5535	1567	2667	60470	45510	1033	3901	13380	3134	2667	566.7	666.7	933.4	1200	1633	1533	1700	700	633.4	500	800	133.3	366.7	100	133.3
1538000	1587000	3005000	184500	3734	169600	271300	9606000	5768	900	2234	65800	50310	700	3667	13380	3201	2200	1100	933.4	900	1033	2067	1500	1500	600	900	633.4	1000	233.3	333.3	166.7	33.33
1661000	1674000	3034000	214300	4635	168900	282800	9468000	6602	1400	2800	62150	57720	600	5869	16280	3501	2800	733.4	966.7	1200	1133	2000	1834	1400	833.4	1367	700	900	433.3	366.7	100	200
1834000	1705000	3355000	213700	3901	174800	317800	10130000	6302	1167	2634	70470	57410	1167	5602	19220	2934	2934	766.7	833.4	1200	1333	2100	1900	1467	966.7	733.4	800	966.7	433.3	433.3	33.33	33.33
1677000	1735000	3372000	202600	4234	182100	303800	10020000	6202	1167	2234	62980	54630	1133	5668	16010	3734	3134	866.7	766.7	1000	1233	2234	1633	1867	766.7	666.7	566.7	1067	166.7	233.3	66.67	100
1702000	1849000	3277000	225900	3201	186600	290600	9547000	6869	1467	2134	61310	51650	966.7	4835	14750	3434	3267	1000	1000	800	1133	2134	1433	1300	400	1100	866.7	1067	266.7	533.3	233.3	33.33
1807000	1776000	3406000	213500	3968	187900	294700	9296000	5402	1033	2100	67450	50340	800	4568	13210	2867	3134	700	1000	833.4	766.7	1667	1567	1633	833.4	966.7	533.3	900	200	533.3	33.33	133.3
1644000	1931000	3451000	219000	3467	200800	317200	9843000	6669	1633	2000	70810	48730	800	5035	12680	3167	2467	833.4	1100	933.4	1400	2034	1500	1500	766.7	1233	433.3	1033	166.7	400	100	33.33
1692000	1892000	3427000	224300	3834	205600	284800	11090000	5668	1200	2400	64630	42670	900	3834	12070	2967	2034	633.4	900	866.7	1100	1467	1500	1367	533.3	1233	533.3	666.7	166.7	433.3	133.3	66.67
1460000	1415000	2792000	187100	4101	169700	224700	8353000	5435	1067	1633	54030	38580	600	3567	10410	2600	2400	533.3	666.7	600	633.4	1600	966.7	1133	500	866.7	600	1267	66.67	66.67	33.33	100
1549000	1472000	2957000	185600	3567	174100	236200	9086000	6035	1333	2167	65270	41530	866.7	4468	11610	2234	2400	600	866.7	1000	1133	1834	1633	1500	500	933.4	466.7	1033	266.7	333.3	66.67	33.33
1666000	1730000	3421000	228900	2934	189700	250100	10350000	6536	1133	2534	72620	52650	833.4	4101	16050	3367	2534	600	1033	866.7	1333	2100	1700	1500	766.7	933.4	500	1100	200	266.7	133.3	0
1766000	1570000	3508000	210000	3167	186400	242400	9640000	5635	1267	2500	66270	49270	866.7	5035	13740	3301	3234	433.3	1200	900	1067	1467	1400	1100	566.7	1000	766.7	900	166.7	100	100	0
1583000	1548000	3144000	214600	3601	184100	241600	9173000	5302	1400	3767	64660	46720	1033	4401	11810	2867	2534	600	1133	1067	933.4	1500	1367	1467	533.3	1233	700	1133	100	233.3	100	0
1541000	1623000	3305000	196000	3801	188000	253200	8417000	5068	866.7	2734	61780	43910	733.4	3334	11810	2100	2367	700	700	1233	833.4	1367	1800	1167	733.4	766.7	466.7	866.7	133.3	233.3	66.67	33.33
1382000	1643000	3101000	195900	3701	188500	216900	7881000	4601	1167	3067	58150	36440	333.3	3401	9905	2200	1967	700	600	466.7	800	1267	1367	1133	600	266.7	633.4	866.7	100	100	66.67	133.3
1367000	1955000	2942000	186700	3534	212800	208300	7168000	4034	733.4	2667	55500	33730	800	2200	9038	1567	1867	500	666.7	1267	900	1733	1767	1500	666.7	533.3	600	633.4	166.7	200	33.33	0
1517000	2155000	2987000	221900	3134	237000	210600	7871000	3401	1100	2034	65370	36740	666.7	2367	6636	1867	2000	666.7	766.7	800	766.7	1267	1033	1033	533.3	566.7	400	833.4	66.67	200	33.33	0
1446000	2346000	2992000	215900	4168	235000	209700	8124000	4001	1333	1934	64190	31890	633.4	2234	7403	1467	1700	300	500	633.4	866.7	1300	1100	1367	333.3	433.3	500	800	33.33	200	66.67	0
1423000	2041000	2885000	202400	3901	208500	194400	6801000	3734	1200	1934	62110	30220	566.7	1967	7470	1667	1633	566.7	600	866.7	1067	1600	1367	1800	533.3	766.7	733.4	666.7	133.3	200	0	33.33
1444000	1970000	3163000	221500	3667	216800	206300	7366000	4301	933.4	2167	64230	31860	366.7	2167	8070	1533	2134	533.3	666.7	700	900	1733	1233	1133	400	600	700	833.4	100	133.3	66.67	33.33
1491000	1992000	3258000	219000	3334	224900	221800	7592000	4168	1333	1700	61410	34730	366.7	1733	7737	1700	1300	533.3	866.7	733.4	800	1633	1067	1300	200	633.4	533.3	800	100	166.7	33.33	0
1512000	1820000	3267000	199100	3501	217000	212800	6975000	3267	1033	1767	59700	32490	800	2567	8938	1400	1433	466.7	733.4	733.4	933.4	1700	600	833.4	400	700	266.7	533.3	66.67	233.3	33.33	33.33
1660000	1678000	3022000	186800	3367	188100	197100	6742000	2967	1400	2167	59390	30620	400	2434	8404	1667	1400	400	533.3	733.4	633.4	1900	933.4	1333	500	500	466.7	400	233.3	100	100	0
1379000	1724000	2892000	206700	4134	199700	185700	6593000	4168	1267	2500	57750	32320	566.7	2734	8904	1467	2234	433.3	666.7	766.7	1000	1767	1167	1133	700	866.7	500	800	133.3	233.3	66.67	66.67
1317000	2100000	2966000	213700	3634	231800	212200	7604000	4334	1400	2067	52280	39350	700	3501	9271	2300	1900	633.4	1000	800	800	1700	1633	1700	800	766.7	933.4	733.4	233.3	133.3	100	133.3
1516000	2337000	3214000	235800	4968	252400	270400	9394000	4701	800	2200	58550	54130	1067	5035	16050	3167	2434	900	1233	1100	1300	2300	1533	2300	966.7	1100	566.7	1167	133.3	233.3	33.33	133.3
1471000	2079000	3158000	232500	4034	217500	241900	8687000	5635	1300	1967	59090	49300	1100	4301	16210	2867	3034	1100	1367	1033	1133	2300	2200	1533	666.7	1133	766.7	800	466.7	466.7	166.7	66.67
1781000	1875000	3131000	222600	4168	203800	246200	8806000	5335	1467	1800	56470	52750	866.7	4368	16580	3501	3634	800	966.7	1400	1500	1834	1300	1333	766.7	1167	866.7	866.7	200	466.7	133.3	33.33
1540000	1598000	2779000	212100	4168	185100	208300	8120000	5135	966.7	2400	58320	52220	733.4	5502	15810	2767	2667	933.4	900	866.7	1267	1733	1834	2134	866.7	733.4	1100	1000	300	266.7	133.3	100
1634000	1626000	2862000	195100	3867	183100	205900	8206000	5368	966.7	2067	57410	46950	900	5035	15150	2767	2900	700	833.4	1000	1300	1567	1633	1667	766.7	933.4	766.7	833.4	100	300	200	100
1650000	1775000	3226000	208600	3667	197800	217500	8215000	4468	1400	1800	60030	48030	533.3	4334	12310	2267	2600	400	866.7	1200	1200	1967	2000	1467	833.4	1000	533.3	1033	166.7	333.3	100	66.67
2898000	2154000	5770000	320100	3301	313400	258100	10690000	7503	1367	3234	140700	50170	966.7	4201	13840	2734	2534	733.4	1100	800	1567	2034	1600	1300	600	800	866.7	900	133.3	433.3	33.33	0
3236000	2340000	7201000	361100	3701	296800	232400	9946000	7136	1633	2834	110600	35770	700	3267	9939	2167	1533	466.7	1000	1033	666.7	1233	933.4	1467	466.7	666.7	500	900	233.3	333.3	0	33.33
2228000	3394000	4705000	253400	4101	206000	203100	11990000	7203	1033	3667	86040	36140	633.4	2734	9238	2167	1700	400	500	666.7	633.4	1433	1067	700	433.3	766.7	200	733.4	166.7	200	66.67	0
1413000	3868000	2803000	210900	3401	131100	123000	8309000	4168	1067	3000	49530	23130	433.3	1800	6936	1267	1200	500	333.3	466.7	466.7	433.3	466.7	766.7	333.3	266.7	233.3	466.7	33.33	133.3	33.33	33.33
1004000	1507000	1431000	97720	3534	71410	63080	4019000	1767	1100	2534	24030	12480	166.7	1467	3401	733.4	700	233.3	166.7	400	300	500	500	333.3	300	300	200	266.7	33.33	33.33	0	33.33
743900	1973000	1176000	96580	3101	53590	58590	4833000	2434	1133	2000	21190	14180	133.3	733.4	2400	833.4	500	166.7	200	133.3	333.3	366.7	233.3	333.3	66.67	66.67	100	333.3	66.67	33.33	0	0
578000	2590000	875400	95130	3567	47520	50840	5776000	2500	1100	2834	17150	16310	300	1167	2800	666.7	866.7	133.3	300	200	200	633.4	433.3	433.3	166.7	233.3	133.3	400	0	133.3	166.7	0
644400	3679000	911000	125200	3567	45780	56370	7139000	2734	966.7	6302	18750	24730	466.7	900	3000	800	566.7	233.3	166.7	166.7	300	566.7	400	266.7	100	400	133.3	500	0	266.7	133.3	33.33
732300	4181000	991500	129600	3234	46280	56940	7062000	2667	1000	3501	19550	25870	200	1100	2834	766.7	366.7	133.3	133.3	66.67	433.3	266.7	466.7	300	133.3	200	33.33	333.3	66.67	100	0	0
631600	2992000	910700	112300	3801	41130	54130	5763000	2434	1000	6836	18080	21390	233.3	1033	3901	700	966.7	133.3	133.3	233.3	266.7	533.3	400	400	100	300	0	600	166.7	200	33.33	0
1211000	2898000	1635000	179400	4101	105500	131900	8524000	4434	1333	4201	45010	44840	600	2900	7703	2000	1800	333.3	600	466.7	700	933.4	866.7	566.7	366.7	600	166.7	800	166.7	366.7	200	33.33
2276000	3042000	3072000	229400	4301	167200	194800	10270000	4468	1100	4768	61740	56680	533.3	2700	8337	1633	1700	233.3	700	766.7	500	1200	1100	1033	400	733.4	433.3	633.4	100	300	133.3	133.3
1536000	2324000	3317000	205100	3667	169200	159800	8324000	3901	1167	4234	67010	48330	833.4	2467	8704	1700	1400	466.7	266.7	500	733.4	1300	1033	833.4	266.7	600	366.7	933.4	166.7	200	33.33	0
1743000	2056000	4156000	205300	4334	184800	168700	7981000	4234	1267	2867	77290	41060	366.7	2234	7303	1767	1567	266.7	633.4	400	1067	1000	1000	666.7	200	666.7	233.3	1000	66.67	266.7	66.67	0
1783000	1982000	4386000	225100	3968	220400	179900	7551000	3734	1167	3000	81300	36000	533.3	2334	7503	1600	1767	266.7	633.4	500	566.7	1333	966.7	1100	833.4	400	566.7	333.3	166.7	133.3	133.3	66.67
1569000	1967000	3864000	203000	3634	197700	156500	6377000	3167	1300	3000	64160	33390	633.4	1867	6536	1400	1367	466.7	666.7	333.3	833.4	966.7	900	466.7	533.3	300	233.3	600	166.7	133.3	33.33	0
1346000	1775000	3183000	175600	3167	180800	161100	5881000	2700	1100	2434	58960	30550	566.7	1900	5468	1000	1000	300	600	366.7	700	1100	1400	1067	333.3	433.3	400	500	66.67	166.7	66.67	33.33
1639000	1894000	3114000	199600	3534	187200	175900	6547000	3501	966.7	2300	64530	32590	466.7	1967	6469	1533	1300	333.3	533.3	500	866.7	1533	1000	1233	433.3	766.7	566.7	766.7	66.67	100	33.33	0
1572000	1997000	3444000	206300	3467	211500	200000	7671000	3134	1300	2000	68730	33430	866.7	2534	7136	1600	2134	533.3	800	833.4	766.7	1200	900	933.4	466.7	700	600	833.4	200	200	133.3	66.67
1611000	2134000	3552000	222300	3968	215900	228900	8106000	4034	1167	2067	69530	38280	633.4	2634	8704	1633	1800	666.7	966.7	933.4	666.7	1633	1100	1067	533.3	766.7	366.7	800	166.7	33.33	33.33	0
1682000	1897000	3365000	208000	3267	197400	251400	8750000	4768	933.4	2000	69300	39850	733.4	3234	10240	1800	1733	733.4	733.4	866.7	1067	1700	1167	1333	566.7	766.7	533.3	900	66.67	433.3	133.3	33.33
1775000	1897000	3744000	219600	3034	203300	238300	10710000	5568	1333	1800	75780	42060	1133	3434	12680	2800	2200	466.7	733.4	833.4	1000	1767	1333	1133	766.7	900	433.3	700	200	1033	100	0
1585000	1736000	3405000	205500	3968	185000	204500	12420000	7270	1533	1800	80350	38050	1067	3234	11210	2700	2000	733.4	933.4	966.7	833.4	1733	1300	1267	366.7	633.4	533.3	900	166.7	800	100	66.67
1872000	1711000	3076000	193300	4234	185400	220100	10130000	6069	966.7	1834	80590	34330	833.4	2900	9605	1733	2100	533.3	766.7	633.4	1100	1433	1467	1000	533.3	733.4	400	866.7	0	700	33.33	33.33
1721000	1888000	3352000	223100	4134	207800	234300	9872000	5335	1133	2500	70200	37480	1100	2334	9972	1867	1934	766.7	766.7	833.4	1167	1400	1067	966.7	333.3	900	633.4	300	233.3	600	66.67	33.33
1435000	1560000	2831000	185800	3501	168500	195700	8786000	4801	1067	2367	68620	32160	866.7	2867	9271	1767	2067	500	566.7	666.7	866.7	1433	1133	1333	733.4	1233	366.7	466.7	66.67	366.7	166.7	0
1547000	1651000	3378000	196200	3201	196600	241600	10010000	4768	1100	2134	63660	35270	600	2534	8637	1934	1967	400	933.4	633.4	700	1200	1300	1033	300	900	566.7	933.4	100	266.7	100	0
1551000	1626000	2972000	191500	3301	179100	220000	9885000	5101	1200	1533	68860	36170	800	3601	11810	2167	2067	466.7	666.7	1067	900	1567	1467	1433	533.3	966.7	500	1300	66.67	266.7	66.67	66.67
1637000	1541000	3102000	214900	4201	171600	220200	9786000	5535	1200	2400	63420	38110	966.7	3968	9538	2567	2600	733.4	366.7	733.4	766.7	1667	1667	1133	633.4	966.7	600	766.7	33.33	233.3	100	33.33
1332000	1342000	2750000	167600	3968	160100	190500	8332000	5168	966.7	2234	58690	36610	800	3034	8838	2267	2067	566.7	700	633.4	1100	1400	1300	1400	366.7	933.4	466.7	466.7	166.7	433.3	66.67	0
1397000	1586000	3074000	175900	3301	178400	212300	7849000	4368	1100	2634	66140	37540	633.4	3501	9205	2034	2000	766.7	1000	566.7	633.4	1500	1233	1133	400	733.4	300	1000	33.33	166.7	100	0
1374000	1835000	3080000	184400	3434	178800	210500	7849000	4434	1067	2000	51680	34530	566.7	2400	8337	1767	2034	600	866.7	900	700	1267	1200	1367	500	833.4	300	1033	33.33	366.7	133.3	0
1341000	1683000	2821000	185300	3934	180500	212000	7541000	4501	1633	2200	64060	31760	733.4	3567	9105	1500	1834	466.7	633.4	933.4	900	1433	1100	966.7	833.4	1167	333.3	666.7	33.33	266.7	33.33	33.33
1347000	1703000	3092000	186200	3901	174000	219200	8122000	3767	966.7	1767	57410	33600	766.7	2534	8671	1633	1633	400	866.7	566.7	1200	1467	866.7	1200	866.7	1000	366.7	1067	66.67	266.7	33.33	33.33
1461000	1481000	2986000	186000	4068	189400	218100	7339000	4534	1167	2434	56640	34200	666.7	2734	9371	1733	1767	633.4	966.7	500	600	1533	1067	1033	366.7	300	433.3	600	33.33	566.7	100	33.33
1336000	1419000	2677000	164100	3101	168300	196800	7040000	4001	1100	2767	56940	30650	366.7	3034	8170	1800	1667	800	533.3	433.3	700	1533	1233	1033	666.7	733.4	433.3	800	100	233.3	100	100
1339000	1548000	2870000	186700	2934	171100	204200	7570000	5368	1500	2867	57620	33730	666.7	2767	9805	2034	1500	500	366.7	800	566.7	1567	1200	1267	533.3	466.7	533.3	666.7	133.3	166.7	33.33	33.33
1521000	1466000	2712000	178700	3000	162500	201700	8446000	4201	1067	3134	55070	32520	666.7	2500	8604	1767	1467	433.3	766.7	566.7	666.7	1200	1300	1100	333.3	900	466.7	533.3	66.67	133.3	66.67	33.33
1267000	1451000	2728000	175000	3734	167000	216400	7655000	4735	933.4	2867	60500	38820	833.4	3067	12580	2367	2334	600	600	766.7	1200	1800	1333	966.7	800	700	500	733.4	100	300	133.3	0
1515000	1265000	2693000	171500	3634	142700	223100	8697000	5568	1267	3634	52250	37810	600	3501	11840	2534	2767	533.3	666.7	700	1067	1967	1067	1233	866.7	566.7	533.3	933.4	33.33	200	133.3	33.33
1445000	1095000	2478000	170600	3834	154300	252800	10670000	6969	900	4134	54560	43810	833.4	4268	12880	2700	2200	633.4	966.7	766.7	866.7	1867	1333	1367	633.4	766.7	500	533.3	233.3	366.7	0	33.33
1248000	1118000	2580000	174600	4034	133500	230800	10010000	6102	1067	5535	53050	40820	833.4	4601	13840	2334	2267	733.4	700	1000	533.3	1567	1400	800	666.7	766.7	500	733.4	66.67	266.7	0	33.33
1450000	1239000	2739000	175200	3401	151400	215000	9268000	5435	900	4001	48260	36670	733.4	4034	11240	1967	2334	633.4	500	700	766.7	833.4	1300	1167	533.3	700	400	766.7	266.7	233.3	33.33	33.33
1385000	1201000	2643000	171700	3834	144800	212500	8559000	5268	1133	5535	55130	32360	1200	3067	13110	2500	2067	700	700	900	1000	1867	1067	1567	733.4	933.4	566.7	666.7	100	500	66.67	33.33
1527000	1307000	2753000	172700	4168	151100	205100	8616000	6002	866.7	3134	63150	34970	800	3834	10210	1834	1700	733.4	600	500	566.7	1400	1167	766.7	266.7	700	333.3	566.7	166.7	333.3	66.67	100
1465000	1366000	3030000	188600	3401	159400	206200	9305000	5402	1300	3434	57210	35740	833.4	3367	10370	2367	2134	533.3	933.4	833.4	1000	1467	1100	1333	366.7	966.7	300	500	33.33	233.3	33.33	0
1249000	1154000	2203000	166800	3867	131900	188000	8179000	4701	1267	3267	48730	32260	533.3	3667	9105	2200	1700	500	600	766.7	600	1033	1233	1033	433.3	666.7	500	466.7	66.67	266.7	33.33	33.33
1580000	1446000	2800000	197500	3901	156800	209500	8793000	5268	900	3434	58220	30480	566.7	2534	8671	1834	1733	466.7	566.7	766.7	966.7	1267	933.4	833.4	433.3	600	566.7	533.3	100	400	66.67	0
1378000	1279000	2937000	172100	3634	150900	224500	10360000	6169	1067	4434	55170	38980	1033	3434	12310	2100	1900	900	966.7	1133	566.7	1333	666.7	1200	533.3	700	466.7	700	266.7	300	66.67	100
1662000	1269000	2955000	194600	3634	150100	248800	10810000	8004	1133	4968	59460	48800	1733	4768	15680	2934	2500	1067	1100	833.4	900	1433	1233	866.7	366.7	800	266.7	700	100	666.7	200	33.33
1661000	1078000	2644000	178400	3901	122400	197700	9157000	5869	1467	4735	51410	41660	933.4	4635	13310	3201	2500	700	766.7	966.7	700	1800	1400	1233	833.4	1067	466.7	733.4	166.7	400	166.7	66.67
1783000	1162000	3048000	194200	3701	157800	219800	11420000	6869	1100	4068	62480	49470	1800	4635	16180	2900	2567	866.7	533.3	833.4	1133	1400	1600	1567	600	700	333.3	900	233.3	200	200	33.33
1581000	1195000	2769000	196800	3034	161800	240600	10830000	6502	1233	3734	55870	46280	1367	5101	15250	2300	2267	633.4	833.4	1067	1033	1700	1067	1700	666.7	933.4	466.7	900	133.3	366.7	33.33	200
1563000	1269000	2587000	188500	3867	141900	229000	9321000	5935	1367	3467	50770	42800	933.4	4635	13880	3000	2867	633.4	900	1000	1133	2134	1167	1500	600	866.7	333.3	666.7	166.7	400	166.7	66.67
1468000	1306000	2315000	175800	3401	142100	207700	9074000	5135	1067	3134	55230	36810	900	3067	11440	2500	2267	766.7	666.7	966.7	1000	1533	1167	1233	500	900	633.4	666.7	100	366.7	33.33	33.33
1560000	1658000	2805000	193500	3634	140100	205300	10070000	4568	1300	3367	56140	32520	600	3201	9138	2367	2100	433.3	800	800	800	1400	1200	1367	366.7	933.4	566.7	666.7	266.7	266.7	66.67	100
1696000	1507000	2499000	182800	4001	135200	214000	9167000	5302	966.7	2834	53930	36310	666.7	3834	11110	1934	1600	400	600	400	933.4	1834	1533	933.4	633.4	666.7	366.7	766.7	200	166.7	200	33.33
1669000	1443000	2900000	180700	3801	173300	202000	8763000	5502	1167	2567	58490	34830	766.7	3734	10210	1733	1700	500	733.4	700	766.7	900	900	1033	366.7	633.4	233.3	566.7	33.33	100	66.67	33.33
956100	724800	1450000	90180	3701	81700	97590	4074000	2300	1133	2467	25030	17150	400	1533	5702	1467	766.7	266.7	200	300	500	533.3	366.7	366.7	166.7	366.7	66.67	233.3	66.67	233.3	33.33	33.33
609000	505900	976800	69360	3734	53520	71310	3250000	2234	1133	1934	19050	12640	233.3	1433	3968	866.7	433.3	200	300	200	233.3	466.7	333.3	400	166.7	133.3	133.3	66.67	0	33.33	0	33.33
601900	409100	729900	53290	3467	42200	59020	2473000	1533	1100	1567	16780	10970	400	1233	2834	733.4	666.7	266.7	333.3	233.3	366.7	333.3	400	233.3	33.33	233.3	100	100	0	100	66.67	33.33
497900	386500	606000	41830	2834	37510	52650	2274000	1200	1100	1867	12010	7570	133.3	833.4	2934	433.3	533.3	266.7	133.3	200	233.3	266.7	266.7	100	100	200	33.33	166.7	33.33	33.33	33.33	66.67
443700	330700	549700	37080	3234	32160	44310	1893000	1000	1167	1500	9438	5768	66.67	866.7	1834	266.7	366.7	133.3	133.3	100	133.3	233.3	166.7	233.3	100	66.67	33.33	100	0	133.3	0	33.33
380600	288600	433100	30720	3167	28240	33160	1414000	533.3	1067	2267	8104	5368	133.3	500	1333	533.3	333.3	133.3	33.33	33.33	166.7	200	33.33	200	33.33	133.3	33.33	0	33.33	66.67	0	0
353100	198800	369400	23930	3601	20620	25030	945900	800	1000	1834	6669	3301	33.33	266.7	1100	300	66.67	66.67	66.67	100	233.3	133.3	100	133.3	33.33	33.33	133.3	133.3	0	100	0	0
300000	121600	257600	17720	3167	15150	17920	696100	333.3	1033	1834	3501	3234	66.67	266.7	1233	200	33.33	0	133.3	133.3	66.67	33.33	66.67	33.33	0	66.67	0	33.33	0	0	66.67	0
272700	99040	153200	13740	3334	11140	11940	454100	100	900	2000	3201	2234	33.33	233.3	600	100	166.7	0	0	0	33.33	0	133.3	66.67	66.67	66.67	33.33	0	33.33	33.33	0	33.33
239700	67920	126000	11310	3434	9071	7403	369600	333.3	733.4	1867	2167	1600	0	33.33	466.7	166.7	100	0	0	0	33.33	66.67	66.67	33.33	0	66.67	0	33.33	0	0	0	0
236500	48960	84190	10210	3234	7270	5335	264500	233.3	1000	1333	1433	933.4	33.33	0	233.3	100	66.67	0	0	33.33	0	33.33	0	66.67	66.67	0	33.33	33.33	0	0	0	0
214000	36570	54030	6803	3767	5902	4501	203600	233.3	800	1834	1167	666.7	0	66.67	133.3	66.67	66.67	33.33	33.33	0	0	133.3	100	0	0	0	0	66.67	0	0	0	0
204900	23260	41330	7770	3134	4868	2634	139900	166.7	800	1433	866.7	333.3	33.33	0	133.3	33.33	33.33	33.33	0	0	33.33	33.33	0	0	0	0	33.33	0	0	133.3	0	0
206600	15980	32830	6135	2834	5035	3367	103100	66.67	933.4	1333	533.3	233.3	0	0	66.67	0	0	0	0	0	0	33.33	33.33	33.33	0	0	33.33	0	0	33.33	0	0
197100	14110	21090	4601	2667	4468	1600	99140	33.33	900	1500	366.7	66.67	0	0	33.33	0	33.33	0	0	0	0	0	100	0	0	0	0	0	33.33	0	0	0
202000	10210	16850	5302	3067	4201	1700	41530	66.67	1100	1367	333.3	300	0	66.67	100	33.33	0	0	33.33	0	0	33.33	33.33	0	0	0	0	0	0	0	0	0
192900	10440	14980	4201	3801	3968	666.7	52620	66.67	966.7	1600	333.3	166.7	66.67	66.67	100	0	0	0	0	0	0	0	0	0	33.33	0	0	0	0	66.67	0	0
198700	5001	11610	3567	2900	2900	300	38980	33.33	900	2034	100	166.7	0	0	33.33	66.67	0	0	0	0	0	0	0	0	0	0	0	0	0	33.33	0	0
200400	4101	13240	4868	3634	3634	766.7	34870	66.67	966.7	1567	66.67	33.33	0	33.33	0	0	0	0	0	0	0	0	0	0	0	0	0	0	0	66.67	0	0
195600	3601	8037	3867	2700	3501	300	34670	100	833.4	2134	100	133.3	0	0	0	0	0	0	0	0	0	0	0	0	0	0	0	0	0	33.33	0	33.33
194700	2367	5535	3801	2834	3034	433.3	26840	33.33	1167	1700	33.33	100	0	0	33.33	0	0	0	0	0	0	33.33	0	0	0	0	0	0	0	66.67	0	0
191800	3201	5101	4101	3034	4068	233.3	15810	100	966.7	1467	100	100	0	0	0	0	0	0	0	33.33	0	0	0	0	0	0	0	0	0	0	0	0
187200	666.7	4568	4201	4068	3934	466.7	11440	33.33	733.4	1834	66.67	0	0	0	33.33	0	0	0	0	0	0	0	0	0	0	0	0	0	0	33.33	0	0
184600	1500	8204	4101	3534	3634	66.67	15580	66.67	1000	1733	66.67	0	0	0	0	0	0	0	0	0	0	33.33	0	0	0	0	0	0	0	100	0	0
192400	1133	2734	4001	3101	3934	133.3	15710	0	1367	1767	33.33	0	0	0	0	0	0	33.33	0	0	0	0	0	0	0	0	0	0	0	33.33	0	0
193600	900	1800	3434	2867	3134	200	17020	33.33	966.7	1700	66.67	0	0	0	0	0	0	0	0	0	0	0	0	0	0	0	0	0	0	0	0	0
187700	1533	2434	3767	3501	3601	166.7	12010	66.67	966.7	2134	0	0	0	0	33.33	33.33	0	0	0	0	33.33	0	100	0	0	0	33.33	0	0	66.67	0	0
193200	1467	1967	3867	3434	3000	166.7	11610	33.33	633.4	1867	33.33	0	0	0	0	33.33	0	0	0	0	0	0	33.33	0	0	0	0	0	0	0	0	0
183600	566.7	3401	3901	2800	3101	133.3	13810	100	866.7	1733	33.33	0	0	0	0	0	0	0	0	0	0	0	0	0	0	0	0	0	0	33.33	0	0
195500	566.7	1733	3667	3834	4168	100	10510	66.67	866.7	1533	0	0	0	0	0	0	0	0	0	33.33	0	0	0	0	0	0	0	0	0	33.33	0	0
186400	633.4	1400	3701	3267	3334	366.7	9872	33.33	666.7	1900	0	0	0	0	0	0	0	0	0	0	0	0	33.33	0	0	0	0	0	0	33.33	0	33.33
191200	233.3	1400	3701	3467	3567	33.33	8404	33.33	733.4	1400	0	33.33	33.33	33.33	0	0	0	0	0	0	0	0	0	0	0	0	0	0	0	66.67	0	0
186600	633.4	1700	3901	2734	3534	33.33	10570	66.67	933.4	1367	0	0	0	0	0	0	0	0	0	0	0	0	0	0	0	0	0	0	0	33.33	0	33.33
189000	333.3	2100	3534	2934	3834	33.33	7970	0	666.7	1433	33.33	33.33	0	33.33	0	0	0	0	0	33.33	33.33	0	0	0	0	0	0	0	0	66.67	0	0
LA-map-VEMA-5 29/12/2016 12:39:11 (Run: 1)
189100	133.3	1433	3334	3067	3467	33.33	8304	66.67	1067	1433	33.33	0	0	0	0	0	0	0	0	0	0	0	0	0	0	0	0	0	0	100	0	0
196700	0	1500	4001	3134	2734	100	7203	33.33	533.3	1467	0	0	0	100	0	0	0	0	33.33	0	0	0	0	0	0	0	0	0	0	33.33	0	0
195000	300	1033	4001	3267	3401	133.3	9972	100	1133	1300	33.33	33.33	0	0	0	0	0	0	0	0	0	0	0	0	0	33.33	0	0	0	33.33	0	0
194900	133.3	1400	3934	3067	3767	0	7937	200	766.7	1267	0	0	0	0	0	0	0	0	0	0	0	0	0	0	0	0	0	0	0	100	0	0
189800	66.67	1467	4268	3501	3267	0	8404	33.33	833.4	1733	0	0	0	0	0	0	0	0	0	0	0	0	0	0	0	0	0	0	0	33.33	0	0
192900	300	2134	4068	3167	3434	33.33	7270	100	1100	1433	0	0	0	33.33	0	0	0	0	0	0	0	0	0	0	0	0	0	0	0	0	0	0
188300	33.33	1300	4134	3434	2834	33.33	7803	133.3	1233	1767	33.33	0	0	0	0	0	0	0	0	0	33.33	0	0	33.33	33.33	0	33.33	0	0	100	0	33.33
189800	66.67	1167	3267	4001	4168	0	8037	266.7	1100	1267	0	0	0	0	0	0	0	0	0	0	0	0	0	0	0	0	0	0	0	66.67	0	0
188500	300	1167	4001	3567	3567	33.33	7303	100	866.7	1700	0	0	0	0	0	0	0	0	0	0	0	0	0	0	0	0	0	0	0	166.7	0	33.33
189100	100	1467	4201	3167	3201	33.33	7670	33.33	933.4	1633	0	0	0	33.33	0	0	0	0	0	0	0	0	0	0	0	0	0	0	0	66.67	0	0
188900	66.67	1367	4001	2900	3501	0	7737	133.3	600	1633	0	0	0	0	0	0	33.33	0	0	0	0	0	0	0	0	0	0	0	0	33.33	0	0
188700	66.67	1067	4334	3167	3434	33.33	7036	100	900	1600	33.33	0	0	0	0	0	0	0	0	0	0	0	0	0	66.67	0	0	0	0	133.3	0	0
189400	0	1433	3667	3067	3434	66.67	7436	33.33	1133	1500	33.33	0	0	0	0	66.67	0	0	0	0	0	0	0	0	0	0	0	0	0	0	0	0
192000	66.67	1533	3634	2900	2767	33.33	6836	133.3	866.7	1800	33.33	0	0	0	0	0	0	0	0	0	33.33	0	0	0	0	0	0	0	0	0	0	0
192900	33.33	1700	3934	2967	3101	66.67	7570	33.33	800	2300	33.33	0	0	0	0	0	0	0	0	0	0	0	0	0	0	0	0	0	0	66.67	0	0
187400	166.7	1167	3601	3601	3367	0	8204	0	700	1967	33.33	33.33	0	33.33	33.33	0	0	0	0	0	0	0	0	0	0	0	0	0	0	0	0	0
192000	66.67	1167	4034	2600	3634	100	7670	166.7	1100	1867	0	0	0	0	0	0	0	0	0	0	0	0	0	0	0	0	0	0	0	66.67	0	0
186500	133.3	1033	3801	2567	3767	0	8104	33.33	1100	1267	33.33	0	0	0	0	0	0	0	33.33	0	0	0	0	0	33.33	0	0	0	0	0	0	0
189400	33.33	1200	3934	3734	3467	33.33	7937	66.67	900	1533	66.67	0	0	0	0	0	0	0	0	0	0	0	0	0	0	0	0	0	0	66.67	0	0
186900	300	1433	4101	3367	3334	66.67	7103	100	1000	1533	0	0	0	33.33	0	0	0	0	0	0	0	0	0	0	0	0	0	0	0	33.33	0	0
192100	66.67	1100	3567	2400	3267	33.33	7637	133.3	833.4	1433	0	0	0	0	33.33	33.33	0	0	0	0	0	0	0	0	0	0	0	0	0	33.33	0	0
191300	66.67	1033	3501	3134	3267	33.33	7270	66.67	1433	1867	33.33	33.33	0	0	0	0	0	0	0	0	0	0	0	0	0	0	0	0	0	0	0	0
189000	33.33	966.7	3634	2767	3567	33.33	9672	66.67	400	1767	0	0	0	0	0	0	0	0	0	0	33.33	0	0	0	0	0	0	0	0	0	0	0
187800	33.33	966.7	3334	3034	3734	0	8437	100	1133	1700	0	0	0	0	0	0	0	0	0	0	0	0	33.33	0	33.33	0	0	0	0	33.33	0	0
194600	333.3	4001	4068	3401	4334	1100	39420	100	666.7	1300	666.7	166.7	0	33.33	166.7	33.33	33.33	0	0	33.33	33.33	33.33	33.33	33.33	0	0	0	0	0	33.33	33.33	0
238500	38410	145600	13310	3067	8604	8738	441800	500	633.4	2167	2900	2034	33.33	366.7	433.3	200	0	33.33	100	200	0	166.7	133.3	133.3	33.33	100	33.33	100	0	33.33	0	0
328200	74340	157200	25070	3367	11110	10140	533600	533.3	900	1934	3367	3167	66.67	466.7	633.4	133.3	133.3	0	33.33	66.67	166.7	66.67	100	100	0	33.33	33.33	66.67	0	166.7	33.33	0
345800	123500	383300	28140	2667	18120	26740	1186000	1133	1100	3067	8337	8037	166.7	933.4	2300	333.3	433.3	66.67	66.67	66.67	266.7	400	233.3	400	100	133.3	100	233.3	33.33	66.67	33.33	33.33
526800	282900	714500	52520	3201	37440	71240	2959000	2134	1600	4401	16150	16980	200	1767	5468	1267	1167	200	300	333.3	133.3	466.7	700	433.3	166.7	400	433.3	466.7	166.7	66.67	33.33	66.67
852900	533400	1374000	91090	2467	70670	122600	5122000	4134	1200	3901	28080	27580	400	2400	9238	1533	1800	633.4	566.7	533.3	733.4	1000	666.7	833.4	400	600	400	466.7	33.33	166.7	200	33.33
1065000	710700	1601000	121000	3867	87550	146500	6314000	4835	1000	4434	31190	30420	366.7	3067	10640	2234	1800	466.7	566.7	500	500	1100	966.7	1167	533.3	400	400	500	100	333.3	100	66.67
1114000	843400	1819000	141800	3134	96980	174400	7067000	6869	566.7	4968	37240	34330	633.4	3367	12710	2200	2067	500	866.7	900	966.7	1133	966.7	1333	433.3	800	266.7	466.7	233.3	233.3	0	33.33
1526000	1092000	2126000	163800	4001	113700	201400	8548000	5835	1300	3734	46590	35570	833.4	3467	11270	1967	1867	500	566.7	1100	633.4	1633	1467	1500	600	633.4	500	533.3	66.67	366.7	133.3	66.67
1762000	1224000	2611000	176100	4001	135700	223000	8919000	7003	633.4	3234	50710	33860	833.4	4034	14780	2200	2800	466.7	666.7	833.4	966.7	1367	1300	1433	566.7	966.7	400	633.4	66.67	333.3	33.33	66.67
1552000	1297000	2591000	196900	2967	144900	237400	9804000	7036	866.7	3434	56110	40190	1133	4368	14680	2700	2634	700	966.7	1133	933.4	2034	1233	1233	733.4	733.4	500	600	200	200	133.3	66.67
2108000	1348000	2554000	177100	3434	156800	230200	9705000	6436	966.7	3867	54730	39990	833.4	5502	11840	2700	2534	733.4	366.7	533.3	1233	1333	1133	1767	633.4	800	466.7	866.7	33.33	300	100	100
1580000	1510000	2446000	173500	3901	163400	233500	9735000	6069	1000	3601	48230	39520	1033	4434	12940	2667	1867	466.7	833.4	700	766.7	1500	1500	1100	600	900	500	600	66.67	266.7	0	33.33
1383000	1540000	2542000	194500	3734	162600	228800	8977000	5101	1267	2834	50340	35370	466.7	4101	11640	2367	2300	633.4	566.7	733.4	933.4	1633	1333	866.7	633.4	766.7	433.3	766.7	66.67	100	66.67	0
1522000	1482000	3409000	194800	3201	180600	207400	7547000	4168	1100	2900	64560	30750	566.7	2234	8037	2134	1167	333.3	566.7	933.4	833.4	1367	1567	1000	633.4	766.7	433.3	600	66.67	100	33.33	0
1392000	1274000	3569000	198500	3201	187300	161900	6460000	3968	800	2900	70440	24830	500	2000	7370	1667	1333	566.7	500	466.7	533.3	1033	600	833.4	266.7	566.7	266.7	466.7	66.67	133.3	0	33.33
1430000	991000	3690000	167000	3467	179700	121900	5157000	3434	1100	2600	65800	18220	533.3	1867	4401	966.7	1133	333.3	433.3	333.3	633.4	666.7	566.7	700	233.3	233.3	366.7	600	0	233.3	0	0
1338000	817800	3676000	159800	3767	153100	95940	4877000	2134	1267	2400	64930	15750	500	1500	4501	933.4	833.4	400	400	366.7	366.7	766.7	533.3	466.7	466.7	433.3	200	433.3	33.33	300	66.67	0
1200000	797600	3269000	141500	3234	150600	106700	4564000	2167	1100	2834	66640	16720	566.7	1433	5068	800	833.4	400	433.3	300	433.3	833.4	433.3	733.4	266.7	466.7	166.7	400	33.33	266.7	0	0
1204000	806400	3116000	139700	4068	139800	106800	4397000	2400	933.4	2767	65570	19220	400	1433	5402	1067	1367	266.7	633.4	266.7	366.7	666.7	366.7	466.7	66.67	433.3	266.7	400	33.33	133.3	33.33	0
1207000	840900	3251000	146700	3434	142100	112200	4927000	2234	700	2000	66740	19960	200	1433	4301	1333	933.4	133.3	500	333.3	500	766.7	733.4	333.3	133.3	266.7	333.3	366.7	66.67	233.3	66.67	33.33
1189000	759100	3182000	134700	3401	146300	112300	4646000	2234	1000	2134	63990	17420	433.3	1400	5101	1167	766.7	166.7	533.3	300	333.3	833.4	533.3	800	266.7	566.7	366.7	366.7	66.67	233.3	33.33	0
1289000	802100	3511000	143300	4268	144600	103100	4641000	2067	1000	2334	70510	17920	433.3	1500	4401	866.7	766.7	333.3	200	266.7	333.3	633.4	533.3	600	266.7	366.7	233.3	233.3	200	133.3	100	100
1277000	744000	3511000	147500	3801	155100	106700	4108000	1600	1033	2000	74370	15810	500	1500	3534	766.7	566.7	333.3	166.7	166.7	300	366.7	700	466.7	166.7	300	300	500	0	333.3	0	0
1279000	632300	3825000	164400	3734	162900	91830	4185000	2334	1033	2200	75280	13280	700	833.4	3601	966.7	433.3	366.7	166.7	100	333.3	700	433.3	300	166.7	166.7	233.3	433.3	66.67	100	33.33	33.33
1343000	661000	3861000	153000	3567	156300	80930	3849000	1600	1500	2167	77530	11570	366.7	966.7	2900	733.4	633.4	300	266.7	366.7	166.7	400	700	366.7	200	366.7	200	300	0	100	66.67	0
1370000	578100	3818000	159200	3201	149800	65940	3465000	1300	933.4	2134	70240	10370	666.7	833.4	2434	466.7	600	266.7	366.7	200	233.3	466.7	266.7	366.7	66.67	233.3	166.7	300	0	100	0	0
1296000	561200	3581000	151000	3367	146300	67350	3207000	1267	1267	1967	71110	10540	700	733.4	1767	600	433.3	200	133.3	133.3	366.7	500	233.3	200	166.7	266.7	200	400	33.33	200	0	0
1193000	539800	3431000	141600	3067	137700	61810	2971000	1667	1433	2134	64630	10210	533.3	833.4	3801	500	566.7	200	200	166.7	166.7	466.7	266.7	200	233.3	100	133.3	233.3	33.33	66.67	0	0
1210000	563000	3461000	133200	3634	131400	65270	3154000	1533	1000	1900	64230	12740	433.3	1033	3301	866.7	766.7	166.7	400	333.3	200	666.7	600	400	333.3	366.7	266.7	300	0	200	33.33	0
1179000	658000	3351000	134900	3134	138000	89340	3623000	2367	733.4	1867	55840	15880	433.3	1767	4801	1200	600	366.7	566.7	400	366.7	533.3	566.7	333.3	400	366.7	133.3	400	33.33	200	66.67	33.33
1348000	798400	3364000	150500	3234	147000	113400	5037000	3901	1133	1700	59660	20860	333.3	2000	5802	900	1433	466.7	300	366.7	733.4	966.7	666.7	766.7	166.7	433.3	366.7	600	33.33	166.7	66.67	33.33
1384000	1021000	3006000	166600	3067	151800	136000	5555000	4068	1033	2100	59260	25870	466.7	2600	6803	1800	1300	300	466.7	866.7	766.7	1033	1067	1000	233.3	300	233.3	466.7	133.3	466.7	0	66.67
1358000	1133000	2992000	161600	3534	158000	153500	7003000	4134	1367	2200	58020	28540	766.7	2967	8204	1834	2167	266.7	566.7	933.4	766.7	1300	1267	1433	600	566.7	766.7	633.4	0	433.3	33.33	33.33
1566000	1192000	2976000	171700	3701	158100	173800	7092000	4668	1300	2700	57920	28540	766.7	3101	8871	1567	1834	766.7	733.4	700	466.7	1267	833.4	1067	433.3	766.7	466.7	700	100	33.33	100	0
1477000	1438000	2983000	190700	3267	161500	181500	7916000	4134	1133	2334	59330	27980	733.4	3301	9472	1567	1533	366.7	566.7	666.7	1000	1567	1300	800	366.7	700	600	733.4	166.7	266.7	33.33	33.33
1667000	1396000	3081000	176500	3834	168400	182600	7511000	3567	1433	1667	59190	27980	500	2500	8337	1500	1633	600	566.7	666.7	800	1200	933.4	1267	233.3	766.7	333.3	866.7	66.67	266.7	66.67	33.33
1486000	1491000	2924000	181100	4301	172400	179900	7096000	3301	1367	1867	62880	25700	733.4	2100	7203	1934	1400	666.7	566.7	1000	800	1000	1033	933.4	333.3	500	366.7	433.3	66.67	133.3	33.33	66.67
1448000	1461000	3000000	176400	3767	182600	175100	6602000	3567	966.7	1834	58920	24770	733.4	2100	7270	1200	1200	433.3	466.7	733.4	900	1133	866.7	766.7	600	566.7	366.7	333.3	66.67	233.3	33.33	0
1341000	1480000	2994000	169700	4034	176500	165700	6409000	3701	1033	2067	58350	27340	533.3	1633	6869	1700	1100	533.3	500	500	700	1267	900	866.7	400	333.3	566.7	533.3	66.67	0	133.3	33.33
1291000	1470000	2857000	167300	4034	164700	168000	6293000	2967	933.4	1834	56310	25870	633.4	2034	6569	1333	1267	466.7	633.4	333.3	800	966.7	866.7	733.4	400	333.3	300	566.7	33.33	133.3	0	66.67
1318000	1392000	2511000	159400	3434	152900	159500	6238000	3101	1333	1900	48700	24100	600	1867	6769	1433	1567	366.7	300	566.7	333.3	833.4	1067	800	533.3	533.3	533.3	533.3	100	333.3	0	33.33
1235000	1408000	2634000	173300	3701	163400	165900	6188000	3201	1233	2067	54600	27170	533.3	2467	6035	1200	1567	366.7	733.4	666.7	800	1433	566.7	866.7	200	666.7	333.3	533.3	66.67	200	100	33.33
1314000	1382000	2778000	163300	3667	157600	174900	6642000	3267	1400	2134	53930	33390	733.4	2900	9171	1834	1367	533.3	733.4	566.7	933.4	1267	1467	1233	400	766.7	466.7	500	166.7	166.7	33.33	33.33
1593000	1435000	2778000	186600	3234	162800	188900	6993000	4001	1367	2267	55000	34330	533.3	2700	8070	1800	1767	500	700	500	800	1033	766.7	733.4	633.4	866.7	500	533.3	100	300	100	33.33
1353000	1415000	2899000	170000	3934	154600	186200	7566000	3901	1200	1934	58550	32830	300	2934	8637	1800	1800	433.3	566.7	533.3	766.7	1167	900	1100	366.7	700	566.7	766.7	66.67	200	133.3	33.33
1431000	1610000	2754000	199500	3101	147300	187000	7802000	4368	1100	1867	55600	33160	566.7	2334	9105	1600	1767	500	766.7	700	933.4	1467	1300	1167	366.7	866.7	433.3	933.4	166.7	100	66.67	0
1382000	1811000	2681000	172900	3301	134300	186500	8226000	4868	966.7	2000	53390	30990	500	2500	7603	1500	1467	333.3	700	1000	833.4	1100	1233	733.4	466.7	833.4	533.3	433.3	133.3	300	33.33	33.33
1210000	2174000	2329000	158900	3701	109100	166400	8135000	4368	1000	2267	38050	26440	500	2367	6169	900	1300	233.3	700	766.7	633.4	1067	566.7	700	333.3	266.7	266.7	566.7	133.3	300	33.33	0
1031000	3077000	1897000	134000	3734	86170	136300	7881000	4901	1133	1834	32630	21390	400	1700	5802	1200	633.4	233.3	400	300	466.7	933.4	566.7	900	266.7	433.3	266.7	366.7	33.33	166.7	0	33.33
969000	3648000	1772000	145500	3867	79410	107800	9747000	4868	766.7	1967	32560	18920	300	1467	4034	933.4	866.7	100	133.3	266.7	600	566.7	500	400	266.7	266.7	166.7	166.7	66.67	200	33.33	0
912600	4099000	1712000	142300	4168	74470	108400	7739000	3834	1167	1867	30950	16920	266.7	1733	4635	833.4	1000	66.67	400	266.7	166.7	700	433.3	333.3	400	500	200	333.3	33.33	133.3	0	33.33
939000	3656000	2037000	141000	3000	87180	117600	7734000	3968	933.4	2700	42970	19150	233.3	1867	4835	1333	833.4	133.3	533.3	366.7	366.7	700	433.3	500	200	533.3	300	366.7	33.33	200	66.67	0
1090000	3172000	2380000	159700	3467	111200	141400	7099000	4835	1267	1967	48030	22960	466.7	1767	5735	1467	733.4	433.3	500	466.7	633.4	1100	700	733.4	233.3	433.3	433.3	466.7	0	100	66.67	33.33
2118000	2631000	2514000	160300	3501	116200	152300	7351000	4568	1100	2434	49670	25940	366.7	2434	6669	1767	1800	433.3	600	466.7	600	766.7	1100	700	333.3	633.4	533.3	733.4	133.3	200	100	0
1265000	2346000	2545000	161200	3801	126800	166200	6887000	4134	1167	2167	51110	26540	466.7	1934	7036	1167	1200	266.7	533.3	433.3	533.3	966.7	1067	866.7	400	466.7	366.7	600	66.67	266.7	33.33	33.33
1270000	2040000	2864000	174000	3334	137100	189100	7602000	4234	1333	2200	53560	31820	666.7	2700	7570	1767	1567	366.7	533.3	866.7	800	1167	1133	1400	466.7	733.4	266.7	866.7	133.3	66.67	33.33	33.33
1307000	1986000	2854000	181500	3567	150500	197900	7406000	4735	833.4	2367	53890	31150	666.7	2500	7870	1333	1700	433.3	566.7	733.4	666.7	1300	1000	866.7	400	733.4	633.4	933.4	66.67	300	66.67	0
1363000	1820000	2773000	178000	3000	167000	192400	7750000	4401	1000	2300	57650	29820	400	2534	6602	1834	1733	400	633.4	600	700	1667	1067	900	166.7	600	400	666.7	66.67	233.3	33.33	0
1390000	1764000	2796000	172300	3134	165500	193000	7631000	4068	1100	1967	56740	29850	533.3	2667	6969	1934	1700	466.7	1067	700	600	933.4	666.7	1067	500	833.4	433.3	800	166.7	133.3	66.67	33.33
1443000	1714000	2767000	173800	2900	155100	211900	7485000	4401	900	2334	55170	33090	500	2600	7637	1733	1600	433.3	700	933.4	733.4	1267	1333	1267	533.3	666.7	600	500	233.3	33.33	133.3	100
1312000	1649000	2899000	182500	3467	173500	216500	7470000	3767	1133	2434	58660	31790	500	3034	9071	2200	1967	466.7	366.7	333.3	933.4	1533	1067	1167	466.7	833.4	533.3	866.7	100	200	100	0
1455000	1793000	3214000	199400	3234	186200	221500	8011000	5035	1233	2367	65540	32630	600	2500	9805	2434	2167	500	600	866.7	800	1567	1400	1233	800	800	366.7	600	100	200	66.67	0
1566000	1950000	3328000	215300	2900	190300	247100	8606000	5768	1167	2334	65500	36100	700	2967	9138	1533	1433	366.7	633.4	1100	1100	1100	1333	1333	566.7	1167	333.3	900	200	233.3	0	66.67
1662000	1744000	3324000	210500	3334	190000	246400	9137000	5201	1367	2500	65330	35640	833.4	2634	9205	2400	1767	366.7	866.7	866.7	800	1567	1400	966.7	600	666.7	366.7	700	133.3	100	33.33	33.33
1793000	1685000	3225000	222400	3067	191700	250100	9287000	6235	1033	2600	64700	32830	366.7	2900	9105	1934	1400	400	933.4	600	966.7	1533	1033	1033	733.4	600	566.7	733.4	66.67	233.3	200	33.33
1633000	1572000	3088000	196400	3201	170800	246400	8718000	5535	833.4	3067	62280	33060	966.7	2667	9271	1633	2467	500	500	1067	833.4	1333	833.4	1167	766.7	766.7	466.7	533.3	100	233.3	66.67	66.67
1489000	1618000	3058000	191600	3701	165700	216700	8384000	6302	800	2400	61540	33260	566.7	2934	8437	1934	1400	466.7	500	833.4	1167	1633	766.7	1300	500	600	366.7	733.4	0	300	33.33	133.3
1601000	1742000	3265000	203600	4368	191800	226700	9110000	5568	1033	2200	65430	34160	733.4	2734	8904	2167	1333	600	566.7	500	833.4	1333	933.4	1133	466.7	933.4	400	933.4	133.3	100	33.33	33.33
1568000	1790000	3475000	220400	3934	199100	222000	8735000	5602	966.7	2200	61440	33960	1067	2467	8637	2267	1733	666.7	700	500	566.7	1700	1000	1200	566.7	733.4	433.3	900	133.3	233.3	66.67	0
1657000	1663000	3443000	204500	3534	183500	214500	8205000	4168	1167	2300	64900	35100	466.7	2267	8371	1900	1767	600	733.4	800	733.4	1267	1100	800	533.3	966.7	400	733.4	133.3	100	0	33.33
1553000	1586000	3705000	207000	3867	212400	213100	7802000	5001	1233	2534	73260	32460	800	2700	9638	1567	1834	500	1100	700	1267	1533	1400	1233	666.7	666.7	366.7	800	100	333.3	100	33.33
2011000	1763000	4164000	241300	4134	220100	232500	8115000	4868	1100	2467	75950	35540	700	2434	9939	1433	1867	600	866.7	733.4	1067	1500	1333	1267	400	666.7	500	833.4	166.7	233.3	66.67	0
1662000	1501000	3675000	209300	3701	182500	187500	7135000	4168	1300	2100	70710	28380	466.7	2134	6702	1767	1067	400	333.3	566.7	933.4	1333	633.4	1067	266.7	533.3	266.7	833.4	100	133.3	0	33.33
1698000	1430000	3407000	203100	2867	174100	199700	7334000	4568	1167	2734	76020	32490	600	2867	7603	2000	1433	800	533.3	600	900	1100	966.7	1033	466.7	700	366.7	1067	66.67	200	33.33	33.33
1695000	1588000	3448000	208700	3467	193600	198300	7253000	4034	1033	2767	69700	33090	466.7	2800	7837	2134	1533	633.4	400	533.3	766.7	1300	1433	1133	466.7	833.4	600	600	200	166.7	233.3	0
1898000	1957000	3226000	216800	3267	190200	196500	7700000	4701	1400	2134	65670	29610	533.3	2834	8738	1700	1600	433.3	800	700	800	1367	1267	1133	700	433.3	333.3	500	133.3	200	33.33	66.67
2094000	2246000	3351000	210800	3801	188300	206000	8595000	5335	1233	2467	63450	32160	466.7	2167	8237	1533	1133	233.3	833.4	566.7	733.4	1000	1300	1067	400	600	500	733.4	133.3	133.3	33.33	0
1380000	2357000	3081000	187800	3734	186300	196000	7569000	5502	900	3267	57680	28810	600	2500	7403	1000	1433	200	466.7	766.7	833.4	1300	766.7	633.4	133.3	700	400	600	66.67	200	100	33.33
1302000	2348000	2570000	183300	3434	176200	180000	8109000	4635	933.4	2667	61270	29510	800	2000	7370	1600	1167	700	600	433.3	800	933.4	1433	1133	300	833.4	600	933.4	0	233.3	0	0
1344000	2891000	2764000	193700	3501	177600	203300	8374000	4835	1533	2100	52450	32690	666.7	3134	7370	1967	1633	900	700	466.7	600	1633	1067	1467	366.7	466.7	300	833.4	133.3	366.7	100	100
1370000	2956000	2993000	205200	3534	208500	224300	8694000	4601	1400	2034	64230	40590	466.7	2900	8738	1867	1834	366.7	500	1000	900	1333	1367	1533	633.4	766.7	666.7	1000	33.33	333.3	33.33	100
1715000	2753000	3450000	227300	3134	224000	250300	8906000	5235	1267	2400	63050	45110	933.4	3434	11310	1900	2634	800	700	466.7	1167	2000	1133	1433	633.4	766.7	1167	933.4	133.3	300	166.7	133.3
1619000	2427000	3467000	226000	4101	209600	244200	8963000	4901	1533	2034	75140	42700	766.7	3000	11240	2000	2267	300	933.4	1133	933.4	1600	1300	1500	466.7	500	500	1100	100	166.7	133.3	66.67
1634000	2071000	3447000	217400	3434	202300	238700	8895000	4735	1633	2500	71920	43240	666.7	4234	11310	1900	2500	433.3	633.4	900	600	1267	1600	1200	600	866.7	566.7	666.7	233.3	166.7	33.33	100
1745000	1866000	3361000	226400	3968	194000	240500	9120000	5068	1100	2434	70270	43770	366.7	3867	12140	1800	2267	533.3	866.7	733.4	800	1733	1433	1233	733.4	633.4	366.7	733.4	333.3	300	33.33	33.33
1627000	1759000	3145000	207400	4601	190600	243800	8756000	5235	1200	2634	63120	43970	766.7	3367	11340	2367	1633	666.7	866.7	966.7	1133	1633	1467	1800	800	533.3	433.3	666.7	100	100	66.67	66.67
1746000	1753000	3458000	207200	4101	188500	267900	9486000	4701	1333	2567	71820	43170	1033	3934	10610	2567	2234	866.7	1033	900	666.7	1367	1200	1500	666.7	900	400	766.7	233.3	266.7	66.67	100
1579000	1568000	3180000	210300	4301	175000	237800	8778000	5635	1867	4901	69330	43600	766.7	4134	12480	2300	2167	566.7	766.7	1133	900	1600	1733	1700	766.7	900	666.7	833.4	100	233.3	66.67	66.67
1664000	1631000	3289000	212500	4234	187100	246900	9303000	5502	1333	2200	70540	45480	600	3534	12440	2634	1900	600	866.7	866.7	1267	1600	1633	1133	466.7	766.7	533.3	866.7	233.3	266.7	100	100
1675000	1683000	3378000	197000	4068	172900	234800	8717000	5768	1000	2267	69260	42600	900	4001	13810	2467	2867	933.4	733.4	900	966.7	2067	1367	1100	566.7	1000	566.7	766.7	66.67	200	66.67	33.33
1962000	1964000	3940000	213500	3567	202300	244300	8711000	4635	1233	2300	79510	42030	866.7	4334	12010	2300	2034	366.7	700	966.7	833.4	2234	1167	1433	466.7	566.7	600	1200	166.7	266.7	100	33.33
1669000	1865000	3671000	217600	3134	226600	208300	7775000	4468	1167	2134	66910	36310	633.4	3701	11310	2300	1733	433.3	566.7	766.7	766.7	1433	1167	1367	800	433.3	466.7	633.4	100	133.3	100	0
1493000	1799000	3411000	205400	3667	204100	181900	6572000	3467	833.4	2667	65370	29480	433.3	2567	9171	1633	1500	333.3	533.3	700	533.3	1333	1000	800	600	800	300	633.4	0	233.3	100	0
1349000	1828000	3171000	188400	2867	202800	154700	5627000	3000	833.4	2334	59260	27170	233.3	1934	6436	1600	1033	333.3	666.7	866.7	600	1433	1033	1233	566.7	366.7	333.3	466.7	33.33	233.3	33.33	0
1242000	1713000	3025000	195200	3667	203100	162900	5811000	2767	1100	2400	53190	24930	266.7	1934	6235	1433	1467	400	700	466.7	366.7	900	866.7	566.7	433.3	400	233.3	666.7	100	166.7	0	33.33
1178000	1565000	2916000	180100	4068	192700	160600	5559000	3234	833.4	2300	55870	25100	500	2367	7570	1167	1233	633.4	833.4	866.7	1100	1533	866.7	1467	633.4	433.3	200	666.7	33.33	166.7	0	33.33
1338000	1800000	3036000	185800	3968	206400	169500	6078000	3201	1367	2334	57380	27040	566.7	3000	7903	1934	1433	433.3	866.7	500	1000	1200	1267	1067	500	433.3	566.7	766.7	300	166.7	100	0
1308000	1729000	3073000	209100	3434	207500	181600	6914000	2900	1167	2034	59860	30120	566.7	2700	7503	1433	1767	566.7	633.4	666.7	800	1633	1133	866.7	566.7	666.7	466.7	833.4	0	33.33	66.67	33.33
1469000	2023000	3287000	216000	3834	237600	208000	6691000	3167	1000	2500	65030	31250	566.7	2600	6869	1400	1767	300	466.7	733.4	766.7	1600	1533	1067	433.3	633.4	433.3	900	133.3	166.7	66.67	66.67
1328000	2036000	3319000	206400	3701	229400	195600	6404000	3801	933.4	2167	61340	26670	433.3	1467	5635	1700	1467	366.7	666.7	733.4	866.7	1233	1233	1000	500	400	400	666.7	133.3	166.7	0	0
1427000	2165000	3104000	206800	3968	240800	198700	6036000	2867	1433	1800	65100	26610	200	1600	5869	1733	1600	400	400	700	600	1533	1200	1067	533.3	533.3	500	666.7	66.67	133.3	33.33	0
1360000	2303000	3463000	241700	3601	270800	198300	6685000	2634	1233	1567	65500	29720	233.3	1967	5969	1400	1867	533.3	633.4	966.7	1100	1467	1700	1333	666.7	1067	533.3	766.7	166.7	200	33.33	0
1697000	2650000	3532000	258900	3367	282600	220300	7323000	2800	1133	1834	67350	33330	500	1600	6169	1433	1333	433.3	633.4	1067	700	1633	1333	1133	566.7	533.3	266.7	866.7	0	66.67	33.33	0
1414000	2413000	3376000	215700	4168	250400	204700	6399000	2234	1100	1500	65540	30520	833.4	1400	6436	1533	1633	500	733.4	700	866.7	1667	1300	1667	400	733.4	300	833.4	66.67	200	66.67	0
1429000	2258000	3495000	200200	3734	220100	206800	6689000	2500	1300	2034	64330	28880	333.3	1834	6602	1267	1667	366.7	533.3	633.4	666.7	1267	600	1233	566.7	900	566.7	800	0	200	0	0
1630000	2134000	3141000	225900	4334	214700	202200	7173000	3501	900	1733	66840	30480	233.3	2600	8537	1800	1567	633.4	666.7	766.7	900	1467	1267	1233	500	933.4	333.3	1000	200	100	33.33	33.33
1504000	2203000	3580000	239200	3667	255600	248600	8198000	4768	1167	2667	67850	36510	500	2800	10470	2334	2334	666.7	566.7	1067	800	1467	1633	1067	433.3	833.4	400	866.7	100	266.7	100	0
1761000	2340000	3555000	234100	3934	244700	300900	10710000	5768	1367	2600	71280	46280	666.7	3634	13340	2700	2500	533.3	1267	1167	1667	2134	1733	2067	700	866.7	900	1400	233.3	733.4	33.33	0
2970000	4009000	6577000	418000	4268	413300	476100	16650000	8838	1500	3501	121400	56780	1367	4401	14510	3501	3201	1233	1100	1400	1467	2134	1867	1900	666.7	900	533.3	966.7	266.7	266.7	100	0
2276000	2655000	4372000	275400	3667	256500	339000	11610000	6569	766.7	4601	82200	56470	900	5368	16680	3834	3434	933.4	1000	700	2067	2734	1834	1800	866.7	1033	533.3	1033	166.7	366.7	166.7	33.33
1923000	2267000	3819000	277100	3434	223300	309800	11470000	5602	1333	4301	80190	58920	966.7	4768	14440	2567	2900	766.7	966.7	833.4	933.4	1167	1333	800	600	933.4	500	566.7	133.3	366.7	100	33.33
1333000	1260000	2121000	147600	3601	121300	165000	5695000	3067	1033	2434	40020	28040	466.7	2200	5435	1400	1000	400	166.7	166.7	633.4	966.7	566.7	400	400	466.7	233.3	400	66.67	266.7	66.67	33.33
1156000	821700	1612000	117600	4001	91390	115000	4618000	2967	1533	2834	29050	22530	333.3	1333	4268	1567	566.7	266.7	433.3	433.3	333.3	500	366.7	366.7	166.7	266.7	200	600	33.33	200	0	0
930700	752000	1435000	104900	3867	79110	108500	4532000	2234	1333	2967	28210	30180	300	1267	4868	1033	933.4	266.7	300	266.7	433.3	733.4	700	800	166.7	533.3	133.3	533.3	100	133.3	33.33	33.33
1236000	979600	1868000	151200	3201	92540	125700	6185000	2934	1467	4501	35300	51550	633.4	2000	6302	1567	1067	400	333.3	666.7	433.3	433.3	733.4	900	433.3	433.3	300	600	66.67	33.33	66.67	0
1268000	1076000	1861000	137800	4034	81670	120200	6311000	3467	1033	5402	36640	47490	333.3	2767	5969	1333	1233	433.3	400	466.7	566.7	966.7	666.7	700	333.3	433.3	466.7	800	200	100	100	133.3
1135000	1040000	1764000	122200	3601	84490	129000	5763000	3734	1000	4468	35030	41930	266.7	2167	7069	1400	1633	500	266.7	533.3	500	766.7	666.7	900	266.7	366.7	366.7	966.7	233.3	266.7	0	0
1609000	1433000	2611000	194400	3534	143900	176100	8643000	4101	1433	4401	60570	54030	733.4	3467	10310	2200	1433	700	1267	533.3	1033	1633	1300	1200	566.7	1033	466.7	1100	166.7	366.7	100	66.67
2014000	1672000	3331000	243700	3534	161300	202700	9348000	4701	1133	4534	73730	55130	866.7	3901	12270	3267	2367	533.3	833.4	833.4	800	1900	1367	1467	733.4	966.7	700	1267	66.67	266.7	0	0
2050000	1936000	4004000	254200	4201	224500	245900	11670000	6436	1100	4101	82570	62680	1133	3867	13940	2500	2967	866.7	1000	1167	1433	2034	1533	1433	833.4	866.7	633.4	1267	200	400	66.67	100
2157000	2355000	3971000	263500	4234	240200	256400	11050000	5368	1267	3734	82780	61040	966.7	5502	13510	2734	2467	733.4	900	1033	1133	1567	1400	1333	700	1133	433.3	866.7	33.33	200	133.3	133.3
1931000	1990000	3845000	265700	3567	218300	274200	10560000	7536	1200	3534	75340	53220	666.7	4001	12880	2200	2600	866.7	800	800	1100	2400	1500	1067	600	800	700	1000	66.67	266.7	33.33	33.33
1962000	1960000	3884000	244300	3901	219300	264800	9989000	5835	1267	2967	79980	43570	800	3567	10410	2400	1733	566.7	800	833.4	733.4	1934	1033	1400	533.3	1100	500	933.4	233.3	166.7	100	33.33
1728000	2104000	3415000	230000	4001	210500	239800	9423000	5368	900	2234	69460	40120	700	2367	9839	2167	1500	533.3	733.4	700	733.4	1733	1467	1067	733.4	966.7	800	500	166.7	133.3	166.7	33.33
1600000	1984000	3352000	219000	3367	203000	237000	9028000	4801	1400	2300	70710	37950	366.7	2667	8571	1700	2000	600	633.4	800	1000	1367	1433	1333	766.7	700	500	833.4	33.33	233.3	133.3	33.33
1696000	2008000	3446000	241300	4534	202200	258900	9433000	6469	1200	2967	69360	40320	766.7	2200	9972	1800	1867	700	500	733.4	966.7	1467	1533	1133	766.7	933.4	400	633.4	66.67	333.3	133.3	0
1917000	1944000	3574000	222900	3601	205100	265400	9521000	5368	1433	2800	72690	37510	966.7	2800	9371	2400	1800	366.7	500	733.4	766.7	1233	1333	1100	433.3	966.7	666.7	466.7	66.67	166.7	66.67	0
1705000	2048000	3464000	220200	4268	210600	255300	9304000	5402	1267	2334	71450	37780	433.3	3167	9538	2034	2300	400	466.7	733.4	800	1267	1033	1433	466.7	800	366.7	533.3	66.67	266.7	66.67	33.33
1654000	1639000	3604000	182000	3734	188000	190600	7014000	3901	1300	2834	64460	30180	700	2334	6803	1333	1167	666.7	766.7	500	866.7	1033	733.4	933.4	433.3	600	266.7	866.7	133.3	100	66.67	0
1481000	1290000	3531000	187100	3834	171100	155900	5945000	3201	1267	1867	73500	27010	566.7	2367	6135	1500	1600	333.3	733.4	600	733.4	1000	1033	1300	433.3	300	233.3	866.7	266.7	366.7	100	33.33
1679000	1662000	4065000	207300	4101	219800	195200	8444000	4434	1200	1867	77290	30790	666.7	2534	7870	1600	2000	400	900	833.4	1000	1767	1367	1033	533.3	633.4	533.3	533.3	166.7	400	66.67	33.33
1669000	1496000	3338000	200100	4434	185700	206800	8628000	6235	1033	2134	67790	39220	1000	4468	14780	2900	2134	833.4	800	933.4	933.4	1567	1267	1633	766.7	533.3	666.7	1167	333.3	233.3	233.3	33.33
1613000	1306000	3116000	206000	3434	162200	247900	8712000	6436	933.4	2367	66140	50540	1333	5502	15880	2967	2200	1200	800	966.7	1233	2267	1500	1633	1067	766.7	566.7	1100	133.3	400	133.3	66.67
1629000	1293000	3494000	205900	3234	175900	275700	9553000	7169	966.7	2800	67850	58050	833.4	4801	16050	3334	2467	800	933.4	766.7	966.7	1834	1433	1934	600	833.4	666.7	500	66.67	233.3	100	66.67
1854000	1232000	3192000	189900	3701	161100	213900	8568000	4835	933.4	2400	58590	39650	933.4	3634	11910	3067	2267	933.4	833.4	1100	1167	1667	1500	1433	366.7	1267	700	833.4	166.7	400	66.67	133.3
1535000	1510000	3284000	231700	4401	190600	238300	8559000	4735	1233	2700	65970	46720	733.4	4101	11340	2300	2234	500	766.7	866.7	1300	1667	1667	1400	500	900	500	833.4	166.7	400	166.7	66.67
1773000	1532000	3205000	205600	3134	178900	272000	9923000	4901	1233	2834	64630	45510	933.4	4101	12780	2500	2067	500	1100	1133	1367	1633	2034	1500	466.7	833.4	366.7	833.4	133.3	333.3	200	33.33
1827000	1851000	3393000	227500	3601	206500	292000	10350000	6135	1300	3201	67150	43810	700	4101	12980	2834	2134	466.7	900	1033	866.7	1333	1233	1267	733.4	900	600	700	133.3	366.7	0	33.33
1680000	1623000	3136000	204500	3634	179800	232900	8557000	5435	1267	2100	56440	38080	766.7	2834	10870	2167	2234	866.7	933.4	1067	900	1800	1267	1733	666.7	1133	433.3	1000	66.67	466.7	66.67	33.33
1523000	1771000	3442000	212300	3034	201800	252100	9081000	5335	1167	2467	64460	38350	900	2834	11870	1700	1533	500	700	733.4	1100	1800	1367	1700	666.7	966.7	533.3	600	33.33	266.7	66.67	33.33
1673000	1875000	3318000	224700	3267	207900	249200	9598000	6402	1233	2500	64660	42970	833.4	3234	12880	2867	2134	633.4	833.4	933.4	1133	1934	1667	1367	533.3	1100	866.7	1167	200	333.3	100	133.3
1641000	1618000	3089000	219100	3467	175300	255600	9954000	5235	1367	2434	59190	39080	1200	3767	11270	2634	1800	800	800	666.7	866.7	1934	966.7	1100	533.3	866.7	500	400	100	266.7	66.67	0
2002000	1622000	3183000	196500	3534	181900	240400	8444000	5402	1167	2434	65100	35640	866.7	2400	9071	1467	1567	666.7	1000	766.7	1033	1633	1467	1233	633.4	733.4	533.3	766.7	100	133.3	33.33	0
1419000	1732000	3080000	207900	3167	203400	216000	8681000	5535	1367	2934	65870	34160	700	3101	10310	1767	1433	500	900	1033	1167	1600	1600	1700	500	733.4	566.7	566.7	200	333.3	0	33.33
1602000	1721000	3109000	194900	3834	185800	215300	7908000	4668	1267	2700	61070	38680	933.4	3301	11910	1834	1567	566.7	766.7	533.3	1133	1500	1267	1067	266.7	1100	233.3	833.4	233.3	200	66.67	0
1415000	1520000	2954000	194800	4068	171700	208000	8108000	4868	1233	2667	59730	39920	800	4201	11410	2600	2034	433.3	866.7	766.7	1333	1767	1567	1267	766.7	866.7	366.7	866.7	133.3	233.3	100	33.33
1741000	1651000	3548000	219700	3968	204800	279800	11030000	7570	1133	3401	74030	44510	1133	4534	14680	3067	2367	833.4	733.4	1300	1267	1934	1867	1834	833.4	1133	533.3	833.4	166.7	533.3	233.3	33.33
1740000	1420000	2959000	202700	3567	157700	224600	9745000	7103	1467	3667	58290	39750	633.4	3934	13880	2167	2400	466.7	566.7	833.4	1000	1700	1067	966.7	300	833.4	700	800	166.7	533.3	0	66.67
1625000	1196000	2732000	176000	3601	148400	202100	8594000	6369	1200	2567	56070	38780	1167	4401	11640	2667	2200	900	700	933.4	966.7	1500	1333	1967	766.7	1133	500	733.4	133.3	233.3	100	33.33
1719000	1389000	3081000	201000	3601	159600	255100	11370000	6903	866.7	3367	59230	45150	966.7	4234	14950	2867	3101	400	766.7	933.4	1033	1533	1400	1300	666.7	833.4	533.3	933.4	100	433.3	33.33	0
1403000	1299000	2580000	164900	3467	140500	199200	8344000	5168	1233	2800	53020	32420	700	3767	11070	2200	1767	466.7	733.4	566.7	1200	1500	833.4	1333	266.7	733.4	500	666.7	100	233.3	166.7	33.33
1593000	1577000	3081000	223000	3801	179300	255800	12060000	6736	1133	2967	58960	36840	1033	4101	13710	2534	2067	433.3	766.7	833.4	966.7	1433	1000	1467	600	866.7	466.7	433.3	200	100	66.67	0
1582000	1417000	3081000	205800	3767	150800	242700	10990000	7169	1267	3501	57510	38720	1067	4768	15610	3067	2534	666.7	700	733.4	1233	1533	1433	1600	500	933.4	466.7	566.7	233.3	266.7	66.67	33.33
1339000	1076000	2647000	170600	3834	134000	199400	8442000	5468	866.7	3934	47090	36870	666.7	4668	12540	2500	2534	533.3	633.4	800	866.7	1733	1233	1367	500	566.7	433.3	733.4	133.3	233.3	100	100
1593000	1178000	3003000	206800	3567	160400	234800	10260000	5702	966.7	3134	60400	40760	1000	4268	14610	3267	2900	700	833.4	466.7	900	1400	1100	1400	600	700	533.3	566.7	100	266.7	33.33	0
1580000	1174000	3070000	194800	3767	154100	235300	9210000	6002	1400	3801	62780	42400	733.4	3934	14380	2867	2967	666.7	933.4	933.4	666.7	1467	1133	1300	500	733.4	800	800	0	400	200	100
2308000	1092000	2921000	176600	4034	132600	289700	11380000	8471	1333	3801	57080	54260	1433	7470	20120	4368	3301	1000	866.7	1133	1267	2267	1967	1834	966.7	1333	633.4	1200	300	500	100	33.33
1706000	1056000	2919000	220600	4268	124600	299900	11710000	9038	1167	4168	56310	62580	1300	7737	23200	3767	3501	900	1233	766.7	1200	1967	1967	1100	433.3	866.7	966.7	1200	133.3	400	133.3	66.67
1706000	1114000	2525000	197400	4168	126800	263000	10670000	7536	1200	3401	55500	51580	733.4	4835	16250	3267	3267	700	1000	1000	1167	1934	1567	1200	766.7	1367	766.7	766.7	166.7	433.3	100	33.33
2642000	1236000	2446000	177000	3734	141600	261600	10350000	7236	1733	3401	58620	42800	766.7	4701	12410	2267	2400	533.3	566.7	433.3	766.7	1600	1300	1567	466.7	766.7	433.3	900	133.3	133.3	100	133.3
1484000	1411000	2674000	204700	4201	158200	256500	11590000	7169	1433	4068	59190	45710	900	4201	14310	2400	2600	1133	933.4	1033	1267	1700	1467	1733	766.7	1100	366.7	933.4	133.3	333.3	166.7	100
1466000	1292000	2558000	189200	3701	149600	252400	10780000	7270	1267	2967	56440	46620	1100	4401	15880	2834	3000	733.4	900	966.7	1133	1533	1800	1800	700	1133	466.7	933.4	166.7	366.7	133.3	33.33
1208000	1086000	2282000	153100	3234	129900	236100	8778000	6069	1167	3301	52650	46020	1233	4301	13510	2467	2600	1233	766.7	666.7	900	1433	1200	1700	733.4	733.4	466.7	933.4	133.3	166.7	100	66.67
1736000	1450000	2844000	192100	3734	147300	245600	9802000	5402	1033	3901	53050	41460	1100	3501	11670	1667	2267	633.4	500	633.4	666.7	1200	1267	1367	400	1233	600	866.7	100	400	66.67	66.67
1463000	1399000	3035000	190700	3901	179100	244300	9437000	5535	1033	3401	66040	38820	566.7	2900	10940	2634	1900	400	700	1033	1133	1500	1233	1433	500	733.4	533.3	700	33.33	200	200	0
1650000	1630000	3431000	223000	3167	179900	206100	8190000	4401	1367	3234	55840	31720	600	3234	8738	2267	1934	466.7	533.3	666.7	566.7	1000	433.3	1033	166.7	533.3	400	233.3	100	200	33.33	33.33
785400	649700	1334000	96040	3567	76290	108500	4078000	2567	900	2367	23630	18020	433.3	1300	5869	800	1433	166.7	400	166.7	300	633.4	600	533.3	233.3	300	133.3	200	133.3	0	33.33	0
583700	472000	888900	61000	4068	55300	77460	3270000	2100	1033	2600	18120	13480	400	1133	4068	1267	566.7	300	166.7	233.3	366.7	400	366.7	366.7	133.3	100	166.7	266.7	0	133.3	0	0
563700	357200	697500	59830	3367	42600	67350	2468000	1867	1100	2467	15610	10340	200	1133	3067	533.3	533.3	200	133.3	200	233.3	333.3	233.3	133.3	33.33	366.7	66.67	166.7	33.33	166.7	0	0
474200	304000	616200	42260	3734	36540	52750	2112000	900	1167	1667	11370	8204	166.7	500	2567	466.7	633.4	266.7	200	166.7	233.3	366.7	400	200	66.67	133.3	133.3	33.33	0	66.67	0	0
405700	263100	486600	36410	3201	34000	47420	1708000	800	1167	2534	9205	6669	133.3	466.7	1533	633.4	200	133.3	133.3	166.7	100	333.3	266.7	166.7	66.67	133.3	0	33.33	66.67	33.33	0	0
457900	211000	414800	30750	3234	25470	31690	1248000	600	1133	2067	6469	5702	0	233.3	1300	200	200	100	133.3	100	66.67	133.3	100	33.33	33.33	33.33	66.67	100	33.33	100	0	0
328800	150200	326600	23130	3534	18690	24870	878300	400	1033	2100	5668	4434	66.67	233.3	1167	266.7	133.3	33.33	66.67	166.7	166.7	400	200	100	0	0	0	33.33	0	100	33.33	0
285400	108300	225200	16720	2834	15050	15680	639400	400	900	2267	5068	3134	0	100	600	133.3	200	33.33	33.33	33.33	66.67	66.67	133.3	0	100	33.33	33.33	0	0	166.7	33.33	33.33
257500	75650	146700	15380	3067	13140	11840	471500	333.3	966.7	2134	2600	1500	0	133.3	466.7	33.33	33.33	66.67	33.33	0	100	33.33	33.33	33.33	0	66.67	0	33.33	0	33.33	0	0
240500	52280	114700	10410	3201	9338	9004	328500	66.67	966.7	2334	1767	1267	0	66.67	400	66.67	33.33	33.33	66.67	0	66.67	33.33	100	66.67	33.33	0	66.67	0	0	0	0	0
214800	40960	95940	7870	3267	8070	5935	237700	200	1167	1400	1333	600	0	66.67	300	33.33	33.33	0	33.33	33.33	33.33	66.67	0	33.33	33.33	33.33	0	0	0	33.33	0	0
213600	28010	47520	5568	3067	6035	5101	208400	66.67	833.4	1967	733.4	566.7	0	33.33	333.3	66.67	33.33	0	33.33	33.33	0	133.3	0	33.33	0	0	33.33	0	33.33	0	0	33.33
201100	16650	44710	5702	3134	5502	3767	128200	100	700	2034	866.7	600	0	33.33	233.3	33.33	100	33.33	0	0	0	33.33	0	66.67	33.33	66.67	33.33	0	0	66.67	0	0
200100	12840	28650	5168	3567	4701	2367	77870	266.7	1267	1533	633.4	400	33.33	33.33	200	0	33.33	33.33	0	33.33	33.33	0	33.33	0	0	0	0	0	0	33.33	0	0
199800	11970	28040	4434	2900	4434	2034	58660	66.67	1100	1800	366.7	166.7	0	33.33	100	33.33	0	0	0	0	0	33.33	33.33	0	0	0	0	33.33	0	0	0	0
195100	11940	15910	4534	3134	4434	1167	66440	66.67	1167	1567	266.7	166.7	0	0	66.67	0	0	0	0	0	0	33.33	33.33	0	0	0	0	0	0	33.33	0	0
196000	6436	11510	4568	3334	4268	1100	38850	100	866.7	2334	233.3	200	0	0	0	0	33.33	0	0	0	0	0	0	0	0	0	0	0	0	0	33.33	0
198100	4735	10210	4635	2800	3467	1267	28910	33.33	866.7	1733	233.3	33.33	0	100	0	33.33	0	0	0	33.33	0	33.33	0	0	0	33.33	0	0	33.33	0	0	33.33
188200	3434	7169	4368	3534	3734	633.4	26270	33.33	900	1834	66.67	66.67	0	0	0	33.33	0	0	0	33.33	0	0	33.33	0	0	0	0	0	0	33.33	0	0
196100	2434	6269	4201	3101	4101	566.7	38050	100	1100	1500	166.7	0	0	33.33	66.67	0	0	0	0	0	0	66.67	0	0	33.33	0	0	0	0	33.33	0	0
187200	1633	3901	4901	2867	3867	833.4	27580	100	1000	1767	0	33.33	0	0	0	0	0	0	0	0	0	33.33	0	0	0	33.33	0	0	0	0	0	0
190400	1967	7336	4534	2900	3734	433.3	19790	33.33	933.4	1500	200	66.67	0	0	33.33	33.33	0	0	0	0	0	0	0	0	0	0	0	0	0	0	0	0
191600	666.7	5235	3234	2967	3701	366.7	18390	133.3	633.4	1934	66.67	0	0	0	33.33	33.33	0	0	0	0	0	0	0	0	0	0	0	0	0	66.67	0	0
195400	1400	1700	3968	3201	3167	233.3	12610	0	733.4	1467	66.67	33.33	0	0	33.33	0	0	0	0	0	0	0	33.33	0	0	0	100	33.33	0	66.67	0	0
188600	633.4	3834	5035	3401	4168	233.3	17150	66.67	1100	1700	33.33	0	0	33.33	0	0	0	33.33	0	33.33	33.33	0	0	0	0	0	0	0	0	33.33	0	0
196900	733.4	2200	4034	3234	3801	233.3	12480	33.33	833.4	2000	66.67	33.33	0	0	33.33	0	0	0	0	0	0	0	0	0	0	0	0	0	0	0	0	66.67
193600	633.4	1633	3801	2867	3901	300	9572	33.33	1100	1834	100	0	0	0	0	0	0	0	0	0	0	0	33.33	0	0	0	0	0	0	66.67	0	0
193700	300	3534	3867	3034	2700	200	12780	33.33	1467	2067	0	33.33	0	0	0	0	0	0	0	0	0	0	0	0	0	0	0	0	0	100	0	0
179600	333.3	2167	4001	2934	3434	0	7637	33.33	900	2200	100	0	0	0	0	0	0	0	0	0	0	0	0	0	0	0	0	0	0	0	0	0
194000	266.7	1333	4935	3701	3167	100	8070	0	1200	1967	33.33	33.33	0	0	0	0	0	33.33	0	0	0	0	0	0	0	0	0	0	0	100	0	0
185800	266.7	1733	3134	3301	2767	133.3	13640	133.3	1200	1867	66.67	0	0	0	0	0	0	0	0	0	0	0	0	0	0	0	0	0	0	33.33	0	0
194400	333.3	2467	3401	3034	4168	100	8871	33.33	1300	2167	0	0	0	0	0	0	0	0	0	33.33	0	0	0	0	0	0	0	0	0	0	0	0
190600	33.33	2467	3734	3301	3934	100	8838	100	766.7	2434	0	33.33	0	0	0	0	0	0	0	0	0	0	0	0	0	0	0	0	0	33.33	33.33	0
186200	233.3	1200	4034	3734	3767	33.33	9371	133.3	800	2100	0	0	0	33.33	33.33	0	0	0	0	0	0	0	0	0	0	0	33.33	0	0	33.33	0	0
LA-map-VEMA- 6 29/12/2016 12:43:12 (Run: 1)
194000	0	1367	4368	2867	3634	66.67	9205	0	1067	2267	0	0	0	0	33.33	0	0	0	0	0	0	0	0	0	0	0	0	0	0	66.67	0	0
190900	133.3	1333	3767	3134	3734	133.3	9038	66.67	700	1900	66.67	0	33.33	0	0	0	0	0	0	0	0	0	0	0	0	0	0	0	0	100	0	0
190000	100	1300	3834	3034	3201	0	8237	100	933.4	2367	0	0	33.33	0	33.33	0	0	0	0	0	0	0	0	33.33	0	0	0	0	0	33.33	33.33	0
197400	33.33	1433	3167	3067	2967	0	8270	133.3	1033	2200	0	0	0	0	0	0	0	0	0	0	33.33	0	0	0	0	0	0	0	0	0	0	0
192700	0	1400	4001	3501	3301	0	8070	133.3	866.7	2467	33.33	0	0	0	0	0	0	0	0	0	0	0	33.33	0	33.33	0	0	0	0	0	0	0
194500	100	1400	4201	3534	2934	100	8104	100	1167	2700	33.33	0	0	0	0	0	0	0	0	0	0	0	0	0	0	0	0	0	0	33.33	0	0
188300	66.67	1233	3734	2834	3301	33.33	8404	100	1100	2334	0	0	0	0	33.33	0	0	0	0	0	0	0	33.33	0	0	0	0	0	0	33.33	0	0
191900	366.7	1033	3667	3034	3334	33.33	8804	33.33	1200	2567	100	0	0	0	0	0	0	0	0	0	0	0	0	0	0	0	0	0	0	0	0	0
190500	0	1533	3901	3434	3234	33.33	7737	33.33	1000	2234	0	133.3	0	0	0	0	0	0	0	0	0	0	0	0	0	0	0	0	0	0	0	0
193800	100	1033	3534	2967	3301	0	8604	66.67	800	2134	0	0	0	0	0	0	0	0	0	0	0	0	0	33.33	0	0	0	0	0	33.33	0	0
191300	100	1533	4001	4134	3567	0	8070	33.33	1133	2767	0	0	0	33.33	0	0	0	0	0	0	0	0	0	0	0	0	0	0	0	0	0	0
193100	100	1533	4234	3167	3734	33.33	7737	133.3	666.7	2467	0	0	0	0	0	0	0	0	0	0	0	0	0	0	0	0	0	0	0	0	0	0
186900	133.3	1267	3667	3301	2800	0	6969	166.7	1067	2067	0	0	0	33.33	0	0	0	0	0	0	0	0	33.33	0	0	0	0	0	0	0	0	66.67
190300	33.33	1100	3701	3101	3067	33.33	6869	100	966.7	1700	0	0	0	0	0	0	0	0	0	0	0	0	0	0	33.33	0	0	0	0	0	0	0
200200	0	800	3534	3634	3434	0	8237	0	1033	2067	0	0	0	0	0	0	0	0	0	0	0	0	0	0	33.33	0	0	0	0	0	0	0
194200	100	1367	4401	2867	3034	100	8304	200	1067	2034	33.33	0	0	0	0	0	0	0	0	0	0	0	0	0	0	0	0	0	0	100	0	0
187500	100	800	4334	3234	3034	0	8304	33.33	1267	2000	66.67	0	0	33.33	33.33	0	0	0	0	0	0	0	0	0	0	0	0	0	0	66.67	0	0
187600	33.33	1333	4368	3367	3234	33.33	8037	133.3	900	2634	0	0	0	33.33	33.33	0	0	0	0	0	0	0	0	0	33.33	0	0	0	0	0	0	0
191000	0	800	3101	3234	3401	0	7770	133.3	966.7	2067	0	0	0	33.33	0	33.33	0	0	0	0	0	0	0	0	0	0	0	0	0	66.67	0	0
194400	0	1600	4868	2900	2900	66.67	7603	133.3	1000	2367	33.33	0	0	0	0	0	0	0	0	0	0	0	0	0	0	0	33.33	0	0	66.67	0	0
194800	66.67	1200	3767	3167	3434	33.33	8170	100	900	2134	0	0	0	0	0	33.33	0	0	0	0	0	0	33.33	0	0	0	0	0	0	0	0	0
188300	0	1233	4434	3667	3667	33.33	9004	0	666.7	2000	0	0	0	33.33	0	0	0	0	0	0	33.33	0	0	0	0	0	0	0	0	33.33	0	33.33
189800	0	1267	5468	3234	3234	66.67	10340	66.67	1133	2200	0	0	0	0	0	0	0	0	0	0	0	0	0	0	0	0	0	0	0	66.67	0	0
191900	66.67	1100	3234	2767	3301	133.3	7470	66.67	1067	2067	0	0	0	0	0	0	0	0	0	0	0	0	0	0	0	0	0	0	0	33.33	0	0
196700	3067	11270	4134	2634	4168	733.4	38450	100	1000	2634	666.7	133.3	0	0	133.3	0	33.33	0	0	0	0	33.33	33.33	0	0	33.33	0	33.33	0	100	0	0
203700	21790	40360	12410	2900	6202	4301	217900	200	1100	2534	1233	933.4	66.67	166.7	400	100	133.3	0	33.33	66.67	66.67	33.33	0	66.67	66.67	66.67	33.33	33.33	0	0	0	0
288200	64360	109400	11940	3101	9271	9438	344500	533.3	1033	1867	2800	2334	33.33	166.7	866.7	300	166.7	100	33.33	33.33	33.33	166.7	166.7	66.67	33.33	133.3	66.67	100	0	66.67	66.67	0
316100	159700	308000	36870	3267	20590	27810	1123000	800	866.7	2234	6502	5568	166.7	733.4	2367	433.3	300	166.7	100	233.3	233.3	333.3	166.7	200	166.7	200	200	100	0	100	0	33.33
717400	507000	1003000	80660	3534	68290	87920	3343000	2100	1133	3034	22560	16080	233.3	1867	5001	1300	866.7	133.3	333.3	266.7	233.3	633.4	800	666.7	300	500	233.3	400	100	33.33	33.33	0
1025000	949700	1727000	114800	3834	108400	147400	5339000	2867	866.7	2367	34530	22690	633.4	1333	6369	1533	1600	433.3	600	366.7	666.7	900	1000	633.4	200	300	300	366.7	100	66.67	66.67	0
963000	959900	1729000	122300	3434	105900	132600	4972000	2900	1033	3067	36100	20720	466.7	1900	6936	933.4	733.4	266.7	366.7	366.7	466.7	733.4	766.7	733.4	266.7	266.7	233.3	600	66.67	166.7	0	0
991300	883800	2219000	131300	3367	126000	122700	4573000	2567	866.7	2834	43240	18890	200	1900	5068	900	1133	266.7	500	200	500	400	766.7	466.7	200	433.3	266.7	233.3	0	133.3	33.33	0
1422000	859500	3001000	152700	3467	144100	113000	4328000	2334	1133	2934	60870	16050	500	1167	4368	1100	866.7	333.3	400	300	366.7	800	600	566.7	400	233.3	66.67	300	133.3	133.3	66.67	0
1358000	754100	3524000	153200	3534	150500	105900	3724000	2067	1200	3301	65000	15150	433.3	1267	4568	1167	600	133.3	433.3	200	200	566.7	600	333.3	166.7	133.3	33.33	466.7	66.67	66.67	0	0
1332000	662500	3801000	156100	2834	153100	89570	3178000	1867	666.7	2267	63050	12210	366.7	1233	3901	666.7	833.4	166.7	300	233.3	333.3	466.7	633.4	333.3	133.3	233.3	100	200	0	133.3	100	0
1357000	575000	3982000	166100	3834	162700	73460	2747000	1733	1367	2700	65270	11340	433.3	800	2534	466.7	633.4	266.7	300	300	233.3	400	433.3	300	66.67	200	33.33	133.3	33.33	100	0	33.33
1304000	528100	4081000	160200	3334	164400	67990	2461000	1533	1000	2334	70340	9739	400	766.7	2234	733.4	533.3	166.7	200	233.3	333.3	333.3	200	200	100	133.3	66.67	300	0	133.3	0	33.33
1650000	445500	4498000	152800	3267	161100	56070	2187000	1667	966.7	2500	71950	8771	300	800	2000	266.7	500	33.33	166.7	366.7	233.3	333.3	400	266.7	133.3	133.3	0	266.7	0	66.67	0	0
1388000	388900	4426000	155900	3567	161800	39320	2033000	800	933.4	2900	79750	6869	233.3	466.7	1533	266.7	433.3	33.33	66.67	200	66.67	166.7	133.3	266.7	100	200	33.33	33.33	0	33.33	0	33.33
1453000	286000	4527000	168100	3501	166300	33130	1512000	1167	1133	3067	70910	4701	233.3	566.7	1233	166.7	200	133.3	66.67	66.67	233.3	233.3	166.7	133.3	33.33	66.67	33.33	100	0	200	0	0
1508000	250500	4813000	163200	3000	164300	26740	1448000	866.7	933.4	3267	75650	3968	266.7	333.3	833.4	133.3	266.7	66.67	66.67	100	133.3	33.33	33.33	66.67	33.33	66.67	33.33	66.67	0	66.67	0	0
1703000	212800	5006000	164100	3501	161200	20960	1288000	633.4	1133	2467	80990	3267	233.3	433.3	733.4	333.3	133.3	133.3	166.7	33.33	166.7	166.7	33.33	166.7	66.67	0	100	33.33	33.33	66.67	0	3101
1506000	167500	4967000	157700	3501	157600	18520	1188000	400	966.7	2300	81700	2400	133.3	266.7	1033	100	100	33.33	66.67	33.33	133.3	100	100	33.33	0	33.33	0	33.33	0	33.33	0	0
1707000	128600	5193000	174700	3434	167600	16750	1158000	500	1200	2400	82300	2300	200	300	566.7	200	233.3	33.33	166.7	33.33	66.67	66.67	33.33	33.33	33.33	0	33.33	100	0	66.67	0	0
1646000	149400	5316000	178900	3934	180200	14980	879400	533.3	1167	2900	94960	1700	100	133.3	666.7	133.3	200	0	66.67	0	33.33	66.67	33.33	0	66.67	33.33	33.33	66.67	0	266.7	0	0
1882000	134700	5598000	185500	3801	197700	13640	1143000	733.4	1133	2934	91860	2334	200	233.3	666.7	33.33	0	0	133.3	0	0	66.67	100	133.3	0	66.67	66.67	33.33	0	200	0	0
1548000	122200	5484000	194000	3501	188300	13840	1019000	433.3	933.4	1967	102200	2300	200	233.3	566.7	100	133.3	0	200	0	100	100	66.67	66.67	133.3	66.67	0	0	0	133.3	0	33.33
1870000	147100	5861000	211400	3334	204100	13040	1325000	733.4	1100	2500	93010	2567	500	233.3	800	0	200	33.33	166.7	66.67	66.67	66.67	100	66.67	66.67	66.67	0	0	0	66.67	0	0
1832000	140300	5686000	199500	3634	186900	13940	1414000	633.4	833.4	2267	92470	2700	433.3	433.3	800	100	166.7	0	133.3	0	66.67	33.33	100	66.67	33.33	33.33	0	0	0	100	0	0
1616000	154300	5291000	193400	3734	179500	16210	1887000	733.4	1133	2034	96580	3501	200	433.3	766.7	200	200	100	100	0	66.67	33.33	133.3	66.67	33.33	0	33.33	33.33	0	33.33	0	33.33
1572000	254600	5108000	177200	3567	172600	31320	2207000	633.4	1200	1800	85940	6135	366.7	566.7	1533	333.3	200	0	166.7	200	300	133.3	266.7	166.7	66.67	100	66.67	133.3	33.33	66.67	33.33	0
1501000	333400	4802000	184300	4068	178500	45180	2602000	966.7	1200	2134	86110	7670	466.7	600	2000	400	633.4	133.3	333.3	166.7	133.3	366.7	233.3	466.7	266.7	200	266.7	33.33	0	33.33	0	0
1402000	485100	4349000	169200	3401	157200	66740	2929000	1767	1300	1600	76290	10240	400	1400	2600	466.7	666.7	100	233.3	233.3	366.7	633.4	600	366.7	200	33.33	133.3	266.7	66.67	100	33.33	0
1584000	668700	3936000	186800	3034	155000	96710	4256000	2167	1033	2334	67450	15650	433.3	1300	4635	933.4	966.7	166.7	366.7	533.3	433.3	733.4	700	433.3	600	433.3	266.7	366.7	33.33	233.3	0	33.33
1605000	996800	3789000	181600	4334	176600	132400	5258000	2934	1100	2267	68490	22260	666.7	2000	6302	1200	1633	333.3	733.4	200	566.7	733.4	900	700	166.7	600	300	733.4	133.3	100	0	133.3
1484000	1093000	3604000	174300	3334	178200	156000	6046000	3834	1333	2134	68360	23730	466.7	1700	6869	1300	1333	366.7	666.7	566.7	633.4	1033	666.7	900	300	533.3	333.3	600	166.7	266.7	66.67	33.33
1558000	1216000	3267000	183200	3734	168400	169100	6154000	3801	1467	1967	67380	25570	833.4	2134	6803	1467	1300	466.7	366.7	500	633.4	1267	933.4	1000	333.3	466.7	433.3	500	66.67	166.7	66.67	66.67
1473000	1330000	3120000	210800	3167	171900	175500	6681000	3534	833.4	2500	64460	29350	666.7	2000	7737	1700	1500	733.4	500	700	833.4	1233	1033	766.7	266.7	700	366.7	633.4	33.33	66.67	33.33	0
1521000	1370000	3194000	202900	3968	176900	195000	6668000	4168	1267	2467	62310	32090	700	2734	7837	1867	1467	633.4	500	600	733.4	1200	1067	1033	400	666.7	400	800	33.33	366.7	33.33	33.33
1749000	1291000	3301000	201400	4001	181500	208600	7957000	4101	1400	2500	63250	33360	933.4	2867	9572	1467	2234	600	733.4	533.3	1100	1567	1400	1067	366.7	433.3	666.7	566.7	33.33	133.3	0	33.33
1607000	1407000	3175000	215900	4168	176800	208600	8100000	4268	1000	2434	65330	34570	1000	2834	10970	1767	1733	500	633.4	633.4	1100	1267	1300	1233	533.3	966.7	700	866.7	133.3	200	133.3	33.33
1689000	1471000	3300000	202800	3234	182100	213800	8031000	4801	900	2234	61510	35840	1100	3401	9071	2367	1967	633.4	833.4	800	633.4	1500	1433	1133	500	1067	233.3	600	33.33	266.7	66.67	0
1592000	1464000	3033000	192100	3367	174200	225000	8007000	6102	800	2234	55970	33830	566.7	3101	10310	2334	2434	433.3	666.7	1000	933.4	1567	800	1133	466.7	966.7	566.7	733.4	200	233.3	66.67	33.33
1525000	1447000	3163000	186400	4201	181600	217800	8013000	4434	700	2767	61440	33160	600	3634	9705	1667	2467	666.7	900	900	800	1500	1367	1233	800	500	366.7	1000	133.3	333.3	133.3	33.33
1496000	1496000	3314000	192500	2534	162900	216700	7887000	5302	1200	2367	61170	35770	633.4	3201	9972	2067	2000	566.7	566.7	1033	733.4	1967	1267	1267	466.7	500	566.7	666.7	133.3	300	33.33	33.33
1476000	1311000	2787000	161900	3934	150200	219100	7720000	4501	1333	2734	53150	36640	766.7	3534	10770	2167	2134	533.3	466.7	733.4	800	1500	1100	1400	700	600	500	1133	133.3	233.3	100	66.67
1389000	1228000	2774000	175300	3367	152500	216700	8710000	5101	1467	3301	59490	39080	1167	4501	12710	1767	2700	766.7	866.7	800	1133	1767	1367	1033	600	800	566.7	933.4	166.7	400	100	100
1641000	1267000	2970000	183500	4034	152800	226200	9001000	5935	1033	3334	52720	39690	533.3	4334	13180	3334	2567	700	766.7	933.4	1333	1533	966.7	1367	600	933.4	466.7	833.4	200	366.7	133.3	100
1485000	1324000	3105000	175100	4801	144000	231700	9082000	5568	1267	2767	61840	38850	966.7	3601	11840	2067	2667	566.7	966.7	866.7	766.7	1233	1100	933.4	500	833.4	333.3	700	233.3	166.7	100	33.33
1450000	1294000	2912000	186900	3867	161900	226200	8564000	5168	966.7	2534	57450	40660	1000	3201	11210	1867	1800	566.7	766.7	933.4	1033	1300	1367	1367	700	833.4	400	800	100	466.7	66.67	33.33
1506000	1356000	2858000	183800	3634	165000	229100	8642000	5135	1233	2567	57720	37980	600	2700	10210	2134	2167	666.7	633.4	666.7	866.7	1567	1100	1133	533.3	733.4	266.7	666.7	133.3	300	100	100
1306000	1516000	2824000	174900	3667	157400	215200	7472000	4735	1033	2500	51510	33560	500	3034	8971	1700	1767	666.7	600	933.4	566.7	1400	1167	1300	900	600	400	766.7	66.67	233.3	66.67	66.67
1379000	1595000	2994000	167700	3201	164000	186600	7313000	3901	666.7	2167	54130	31290	833.4	2667	8504	2100	1834	500	933.4	500	766.7	1300	1267	1133	333.3	533.3	266.7	666.7	66.67	233.3	100	0
1303000	1702000	2585000	156400	3801	153700	177700	6738000	3734	766.7	2567	49970	29480	800	2300	7837	1633	1167	233.3	766.7	200	633.4	1033	800	800	500	466.7	466.7	600	200	266.7	133.3	66.67
1174000	1754000	2679000	160100	3334	135900	157300	6134000	3334	1267	2567	53120	26040	633.4	2467	7203	1733	900	833.4	633.4	500	866.7	966.7	1567	933.4	333.3	533.3	400	700	66.67	233.3	66.67	0
1648000	1833000	2991000	175600	3067	161800	163100	7226000	4301	1267	2600	60270	29780	600	2534	8471	1800	1700	366.7	633.4	666.7	833.4	1233	933.4	1333	366.7	800	533.3	700	33.33	233.3	133.3	0
1356000	1705000	3123000	184200	4034	162100	169900	6726000	3467	1367	2767	56010	27470	866.7	2267	7870	1834	1367	466.7	666.7	566.7	733.4	933.4	833.4	1100	466.7	666.7	266.7	400	100	233.3	133.3	0
1384000	1574000	3139000	173600	3201	174400	188900	7305000	4268	1133	2400	62550	29950	533.3	2400	8571	1467	1900	733.4	500	366.7	766.7	966.7	1167	1067	366.7	566.7	266.7	633.4	66.67	233.3	33.33	66.67
1372000	1483000	3075000	187100	3667	156700	190100	6900000	4601	1067	2800	59530	29310	733.4	2434	8704	1800	1700	400	800	733.4	766.7	1333	1500	933.4	366.7	466.7	600	600	100	200	100	33.33
1407000	1515000	3142000	184100	3734	168800	217600	8026000	4501	900	3000	58760	33090	600	2500	8270	1934	1633	533.3	900	633.4	833.4	1300	1100	1167	533.3	433.3	433.3	633.4	166.7	200	33.33	66.67
1507000	1549000	3158000	188800	3501	183200	213400	8180000	4034	1200	2967	55900	33630	700	2900	8304	2100	2000	500	666.7	633.4	900	1800	1200	1433	466.7	766.7	366.7	533.3	100	166.7	100	0
1424000	1624000	2874000	194000	3901	172300	220100	7962000	4668	1067	2767	61880	35200	633.4	2700	8671	2034	1600	666.7	633.4	866.7	633.4	1367	1033	966.7	633.4	800	533.3	600	66.67	266.7	66.67	33.33
1508000	1572000	2926000	195400	3134	172000	238600	8858000	5001	1033	2934	59360	36470	800	3134	8871	1867	1767	433.3	900	666.7	733.4	2000	1400	1167	566.7	533.3	400	466.7	133.3	166.7	66.67	100
1486000	1565000	3011000	203800	4668	167300	231800	9290000	5335	1733	3034	57080	39280	700	3301	9705	1467	1967	733.4	700	1200	900	1367	1400	900	533.3	1067	633.4	766.7	200	233.3	100	0
1689000	1484000	3078000	194200	2900	175800	260600	8746000	4935	1100	2967	59800	40050	966.7	3734	12210	1600	2500	366.7	666.7	900	900	1767	1200	1633	566.7	966.7	533.3	1000	200	233.3	100	33.33
1527000	1500000	2900000	204300	3301	172100	259700	9076000	6836	1200	2767	58820	38850	533.3	2700	10870	2500	2400	766.7	466.7	1167	1267	2300	1000	1000	600	900	666.7	833.4	233.3	300	33.33	0
1524000	1679000	3191000	197500	3367	187000	254500	8735000	5068	1333	3067	66370	39390	800	3567	11070	2034	2300	533.3	800	800	1100	1233	1300	1300	600	933.4	500	966.7	200	333.3	100	66.67
1520000	1678000	3051000	197400	3401	191300	247200	8822000	5535	1100	2734	57180	38450	766.7	3101	10110	2067	2134	533.3	1000	933.4	1167	1834	1800	1834	700	966.7	600	833.4	100	666.7	0	66.67
1548000	1734000	3242000	213500	3901	190400	238900	9415000	5068	1467	3767	53860	38210	800	3367	11610	2300	2234	600	833.4	866.7	1133	1200	1467	1600	966.7	766.7	533.3	966.7	266.7	300	33.33	33.33
1601000	1633000	3243000	201500	3734	185400	258900	9606000	6135	900	3034	60230	41460	1233	3267	11710	2434	2400	700	733.4	900	1000	1500	1700	1233	800	1000	800	700	300	433.3	100	133.3
1583000	1703000	3289000	236100	3201	199700	288700	10050000	7203	1000	3701	68960	41900	800	3601	12580	2834	2467	1167	1100	1167	933.4	1900	1667	1533	700	1167	566.7	700	166.7	366.7	66.67	33.33
1711000	1647000	3148000	221400	4101	187400	282400	9789000	6336	1267	3367	61780	38980	733.4	3267	12340	2467	2300	633.4	800	666.7	1267	1400	1834	1133	600	700	466.7	566.7	166.7	366.7	100	0
1593000	1520000	3348000	202400	4268	181800	248300	9039000	5335	1367	3401	63920	36910	900	3401	11910	2534	1900	600	1067	833.4	1100	1267	1733	1467	533.3	800	566.7	966.7	66.67	433.3	66.67	33.33
1648000	1503000	3699000	199900	4101	208500	239400	8755000	5101	1800	2967	69830	37310	566.7	3201	9739	1934	1834	600	700	900	766.7	1333	1000	1067	400	800	466.7	633.4	100	233.3	133.3	0
1755000	1431000	4411000	228400	4034	211100	211700	7830000	3867	1200	3801	85060	30050	666.7	2567	7703	1800	966.7	333.3	500	533.3	733.4	1467	833.4	900	333.3	733.4	300	533.3	0	233.3	0	0
1739000	1146000	5081000	213900	3601	206400	167100	5806000	3534	1433	2934	88560	22630	400	1600	6336	1333	1000	300	666.7	366.7	533.3	766.7	666.7	766.7	433.3	366.7	200	533.3	100	100	0	0
1642000	830600	5234000	193700	4068	189600	114900	4511000	2234	1200	2667	85570	15250	400	1300	4635	800	1033	166.7	366.7	566.7	366.7	933.4	533.3	400	333.3	500	166.7	400	100	66.67	33.33	66.67
1522000	748000	4672000	173400	3867	186900	98830	4050000	2567	1133	2734	78740	13840	466.7	1667	4534	966.7	1000	266.7	466.7	333.3	433.3	1067	533.3	800	300	300	300	366.7	66.67	166.7	33.33	0
1523000	1005000	4456000	199600	3767	192900	133600	5058000	2800	933.4	3034	68190	19520	600	1467	4668	700	800	366.7	466.7	366.7	333.3	700	633.4	400	200	400	233.3	400	33.33	166.7	33.33	0
1580000	916300	3488000	171000	3867	150500	125800	4977000	3501	900	2700	61340	18950	533.3	1567	4701	1100	1133	133.3	233.3	233.3	400	866.7	733.4	600	333.3	433.3	300	333.3	66.67	33.33	33.33	0
1214000	985600	3089000	160600	4001	148700	164000	6048000	3701	900	2634	56840	24170	666.7	2300	6169	1267	1167	433.3	866.7	533.3	400	800	733.4	933.4	433.3	700	300	533.3	133.3	200	166.7	0
1416000	1324000	3598000	176200	3734	165900	196900	7675000	4635	966.7	2400	65770	29010	733.4	2200	7903	1934	1700	366.7	766.7	633.4	966.7	1167	1133	1200	533.3	666.7	400	700	133.3	233.3	133.3	66.67
1533000	1636000	3356000	185000	4001	181200	257900	9009000	5001	933.4	3401	60270	32120	566.7	2967	7370	1733	1767	366.7	700	466.7	866.7	1533	900	700	700	533.3	400	566.7	200	333.3	200	33.33
1376000	1462000	3323000	186300	4001	167800	242600	8449000	5735	1633	2934	57880	36770	666.7	2834	9371	2100	1700	466.7	800	633.4	833.4	1200	1467	1167	533.3	900	800	666.7	166.7	200	33.33	33.33
1715000	1542000	3535000	202400	4068	192400	258800	9336000	5668	1500	3301	68420	44410	866.7	3767	12480	2634	2600	666.7	966.7	866.7	1133	1900	1167	1333	633.4	1067	600	1100	266.7	466.7	66.67	66.67
1965000	1703000	3852000	229600	3367	217900	249100	9708000	6169	900	3501	76450	47760	866.7	3634	12780	2700	1733	800	1400	700	1033	1700	1367	1533	400	766.7	566.7	1067	166.7	166.7	133.3	33.33
1705000	1629000	4006000	246700	4068	215400	249800	9188000	4868	1333	3367	76760	41430	933.4	3634	10910	2667	2067	766.7	1033	866.7	1067	1600	1267	1500	366.7	600	566.7	800	0	466.7	100	66.67
1746000	1628000	3883000	208100	3667	201000	219900	8607000	4468	1067	3000	79180	36640	566.7	3867	10640	2300	2000	600	900	566.7	566.7	1467	1300	1333	500	600	300	766.7	66.67	400	0	100
1776000	1592000	3995000	220800	3401	206200	208700	7634000	3968	1533	2800	74340	34730	633.4	2900	9438	2167	2034	500	833.4	400	866.7	1067	1333	1367	466.7	633.4	300	600	133.3	266.7	33.33	0
1716000	1511000	3532000	202200	3334	185300	186400	7129000	3101	1133	2400	67050	30180	533.3	2600	7536	1767	1600	566.7	733.4	666.7	666.7	1233	666.7	733.4	466.7	266.7	433.3	366.7	66.67	266.7	100	0
1500000	1498000	3369000	191300	3567	194700	182000	6780000	3134	900	3000	70440	30820	900	2367	7670	1567	1600	533.3	800	900	700	1333	800	900	566.7	466.7	466.7	866.7	66.67	233.3	0	33.33
1575000	1730000	3519000	204900	4068	209000	195200	7235000	2967	1133	2600	71310	31590	533.3	2367	7603	1467	1767	500	700	900	833.4	1400	1100	633.4	466.7	700	600	833.4	100	133.3	0	33.33
1441000	1945000	3698000	198800	3901	208200	206800	7338000	3034	1400	3034	69770	35570	566.7	2800	7370	1600	2534	300	733.4	1033	1033	1233	1400	1033	566.7	1067	400	833.4	100	233.3	0	0
1804000	1838000	3537000	217000	3634	213600	215300	8033000	4068	1333	3101	65540	38480	666.7	3501	10840	1934	2034	666.7	666.7	900	766.7	1567	1600	1500	566.7	633.4	600	733.4	33.33	333.3	100	33.33
1880000	1762000	3366000	199600	4134	198400	235400	8048000	4901	933.4	3101	65430	40090	933.4	3567	12140	2800	2367	766.7	1100	900	1133	1767	1633	1567	566.7	666.7	533.3	933.4	266.7	200	200	33.33
1527000	1711000	3460000	213200	3801	203400	280800	9294000	5502	1167	2834	71850	43300	1000	3267	12170	2567	2267	466.7	866.7	1300	1067	1900	1333	1667	566.7	933.4	566.7	866.7	133.3	300	100	33.33
1660000	1673000	3337000	213100	3801	191100	290000	9792000	6135	1800	3667	71040	52720	1067	5335	15850	2700	2867	733.4	1133	700	1267	2000	1367	1733	633.4	1033	833.4	1067	166.7	233.3	66.67	66.67
1876000	1688000	3775000	227200	4568	210100	336800	11160000	6269	733.4	2800	70740	57820	1133	5535	16950	2767	2834	800	1067	766.7	1267	1633	1433	1867	633.4	900	533.3	1200	233.3	233.3	100	0
1629000	1469000	3557000	210300	3701	190000	297900	8829000	5402	1400	3867	72490	45920	1067	4368	14110	2867	2100	466.7	900	500	1200	1533	1300	1100	366.7	833.4	700	1133	166.7	266.7	100	100
1796000	1601000	4038000	229600	3401	205200	248100	9218000	4901	1233	3167	78000	42800	766.7	3434	11770	2934	1800	566.7	600	933.4	1067	1300	1033	1467	666.7	866.7	566.7	866.7	66.67	433.3	133.3	100
1507000	1425000	3655000	190800	3934	189400	231000	7692000	5068	833.4	2567	61470	43070	733.4	4168	12380	2267	2167	666.7	733.4	633.4	933.4	1467	1200	1000	333.3	1000	200	666.7	133.3	233.3	133.3	66.67
1746000	1256000	3009000	189200	2967	172500	242500	8161000	4635	1133	3000	64430	36100	800	3101	11040	1834	2300	666.7	433.3	733.4	1233	1367	1200	1367	733.4	866.7	833.4	500	33.33	300	100	0
1463000	1406000	3284000	194700	3867	187500	243300	8893000	5101	1433	3134	64900	41060	700	3567	12380	3034	2167	833.4	833.4	933.4	1133	1867	1200	1500	800	1000	500	833.4	166.7	133.3	66.67	33.33
1742000	1631000	3386000	202400	3334	203000	265900	9619000	5535	1233	3267	70000	50000	1267	5068	14280	2434	2300	533.3	833.4	1067	1033	2034	1567	1467	633.4	1133	600	1100	100	400	66.67	0
1587000	1601000	3584000	226000	3867	198700	249900	9566000	5768	1000	2767	65130	48400	966.7	3767	14310	2400	2734	800	700	1167	833.4	1733	1533	1500	766.7	1033	600	833.4	166.7	166.7	100	166.7
1828000	1576000	3329000	208100	4068	180300	260300	8994000	6202	1033	2667	58890	47360	1100	5001	13740	3167	3267	433.3	1133	1133	1167	1733	1867	1400	600	933.4	500	1067	100	666.7	66.67	133.3
1669000	1420000	3174000	195200	3634	175700	223400	9114000	6769	933.4	2967	61710	47890	933.4	5302	13610	3501	2834	666.7	1433	1333	1433	1733	1367	1567	466.7	1100	600	1333	100	366.7	66.67	0
1905000	1547000	3395000	225400	4068	184100	273600	10890000	6936	1300	3000	70100	55470	1367	5335	16720	3367	2967	1000	1500	1267	1800	2334	1934	2167	700	1500	1100	1233	166.7	600	233.3	100
2098000	1853000	3582000	252500	4201	209900	338800	12540000	8404	1267	3534	77090	68830	1133	7103	20820	4168	3701	1033	1267	1267	1834	3034	2367	1667	833.4	1033	900	1000	233.3	466.7	300	166.7
2149000	1637000	3568000	222800	4434	196800	333700	12910000	8904	933.4	3501	69260	62010	933.4	5502	18450	3134	3867	1000	1500	766.7	1567	2034	1400	2200	566.7	1333	866.7	833.4	166.7	433.3	266.7	133.3
1729000	1764000	3260000	210300	3601	182300	305500	10770000	7770	1300	2834	64860	51610	1067	5635	15710	3401	3201	1100	1000	933.4	1567	1433	1667	1767	1000	1300	866.7	1067	166.7	466.7	100	33.33
1912000	1988000	3749000	231500	4768	207900	328300	11280000	7703	1267	3867	78200	53420	1300	4468	15410	3467	3301	700	933.4	733.4	1600	2034	2034	1600	1000	1500	533.3	1300	66.67	300	66.67	66.67
2351000	2201000	4359000	261000	3767	248900	357100	12840000	8437	1100	3767	87220	60870	933.4	5768	20890	4701	3367	1133	1967	1567	1667	2800	2100	2767	733.4	1167	1133	1433	366.7	566.7	100	0
2804000	2947000	4953000	341300	3801	285500	382100	13500000	9438	1300	3968	94490	60970	1567	5502	20660	3968	4801	1133	1167	1700	1633	3034	2467	1800	1000	1100	1100	1300	133.3	500	300	133.3
2802000	3410000	5057000	364000	4735	266300	356300	15260000	8471	1700	9138	80050	76790	933.4	4201	13880	2867	2767	700	833.4	1167	1267	1467	1900	1300	400	1100	833.4	1367	166.7	266.7	133.3	66.67
1665000	1972000	2989000	215500	4134	155500	212700	9518000	5001	1033	5902	45750	53690	566.7	2634	8437	1800	1467	433.3	1000	400	600	1000	900	866.7	366.7	433.3	400	766.7	100	200	33.33	33.33
1180000	1033000	1519000	122500	4134	92060	130400	6058000	2967	800	5268	30690	33700	100	1700	6169	1433	866.7	266.7	466.7	400	300	700	833.4	600	266.7	533.3	300	533.3	66.67	133.3	66.67	66.67
934200	872300	1355000	108100	4001	89710	113200	6298000	3067	1367	4601	27980	34670	433.3	1567	7003	966.7	1000	300	466.7	466.7	466.7	966.7	733.4	633.4	400	333.3	466.7	566.7	166.7	233.3	33.33	166.7
1193000	967600	1689000	122500	4001	103400	139200	6514000	2534	1167	5768	36840	42000	700	1800	6336	1633	1500	433.3	466.7	366.7	533.3	1367	566.7	900	500	733.4	466.7	633.4	166.7	466.7	100	33.33
1169000	1070000	1898000	146800	3567	120100	140400	6630000	2667	1067	4968	35940	41360	433.3	1633	7136	1567	1433	233.3	566.7	566.7	433.3	1067	666.7	633.4	333.3	633.4	400	633.4	66.67	33.33	33.33	33.33
1192000	1287000	2159000	178900	3801	136300	180600	8917000	3834	1167	5535	55370	49200	1133	2934	9238	2234	2134	500	600	600	700	1533	1200	1233	600	800	600	1200	0	266.7	66.67	66.67
1921000	1893000	3440000	230700	3067	189300	242200	11310000	5201	1200	5101	70440	57150	800	2867	10710	2334	1934	566.7	866.7	1000	1200	2067	1267	1333	500	800	566.7	1167	200	533.3	100	66.67
1918000	2111000	3749000	246700	3534	198900	267700	10720000	5168	1167	5835	76020	54330	600	3467	11240	3000	2334	800	833.4	1367	800	1733	1867	1633	433.3	766.7	600	1067	200	400	100	33.33
2106000	2296000	4342000	267000	4301	232200	293800	12130000	6736	1133	5035	83480	58920	666.7	3801	14610	2100	2267	566.7	800	633.4	1100	1767	1700	1500	733.4	1133	600	1133	233.3	500	166.7	0
2199000	2198000	4299000	264600	4201	233700	304700	12130000	6269	1433	4201	86510	51580	900	2867	12380	2967	2567	633.4	800	733.4	1233	1733	1267	1700	433.3	1000	600	1033	200	500	66.67	0
1884000	2118000	3902000	259200	3667	221400	299900	11150000	6536	1300	4001	74400	53690	866.7	4434	13580	2767	2534	633.4	1033	1000	1433	1467	1800	1333	766.7	900	566.7	1100	333.3	300	33.33	66.67
1785000	1952000	3768000	258400	4068	209600	262200	10630000	5902	1067	4101	69670	49330	866.7	3101	12710	1900	2534	733.4	1000	933.4	1033	1733	1733	966.7	433.3	566.7	533.3	900	200	400	133.3	0
1855000	2057000	3351000	237200	3968	194200	264100	10490000	5368	1467	2600	70540	43700	833.4	3167	12640	2767	2334	666.7	700	800	1167	1567	1267	1267	333.3	633.4	800	866.7	133.3	300	233.3	66.67
1807000	1980000	3575000	235400	3601	209900	248800	9499000	5835	900	3234	62180	43470	700	3000	13080	2534	2134	466.7	866.7	733.4	900	1433	1133	1367	600	533.3	666.7	900	33.33	200	33.33	66.67
1798000	1814000	3460000	234100	3601	208000	259100	9454000	5201	1500	3067	71410	44210	800	3901	10910	2600	2634	833.4	933.4	1167	1267	1800	1433	1400	566.7	966.7	566.7	666.7	266.7	366.7	66.67	66.67
1926000	1874000	3447000	253000	3767	207700	286200	10720000	6369	1033	3534	69500	45480	866.7	3867	13340	3067	2267	500	1067	1033	1067	2034	1433	1367	533.3	666.7	633.4	1067	100	300	133.3	133.3
1805000	1870000	3683000	246700	4701	201100	289400	11460000	7103	1133	3301	70070	48430	833.4	4268	14180	2034	2267	700	900	1067	1033	1967	1767	1600	933.4	1000	500	900	133.3	233.3	200	100
1785000	1907000	3726000	234700	3667	221400	293900	11210000	6736	1433	3000	71110	43030	1000	4401	11370	2767	2200	666.7	1100	1100	1067	1700	1167	1467	600	733.4	433.3	900	0	366.7	33.33	33.33
1780000	1779000	3327000	224800	3567	195600	272400	10080000	5802	1033	3301	64700	39590	600	3201	10870	2000	1533	400	633.4	733.4	666.7	1467	933.4	1067	266.7	933.4	533.3	633.4	133.3	400	33.33	133.3
1666000	1389000	3499000	193200	4401	172100	212400	8125000	5068	1367	3367	59760	32290	533.3	2667	8804	1700	1367	300	633.4	800	700	1167	966.7	1067	400	666.7	300	500	0	200	33.33	100
1447000	1077000	3628000	192400	3401	168100	155200	5824000	3167	1367	2700	76420	23800	600	2000	7236	1300	1233	200	666.7	500	666.7	1067	633.4	533.3	200	433.3	433.3	633.4	100	200	100	66.67
2198000	872600	4610000	203200	3834	186300	122600	4993000	2734	733.4	2200	73260	17020	433.3	1367	5101	1067	1367	200	633.4	466.7	533.3	500	666.7	400	233.3	200	300	233.3	66.67	166.7	0	0
1819000	1260000	5120000	223800	3167	224100	163100	6191000	3234	1033	3034	89200	25770	900	2100	6969	1233	1300	566.7	633.4	766.7	700	1233	866.7	933.4	566.7	300	333.3	633.4	66.67	300	33.33	0
1552000	1443000	3673000	184700	3634	192900	185500	7008000	4668	1200	2767	64490	31520	600	2367	7103	1733	1600	266.7	566.7	666.7	700	1100	1100	966.7	466.7	433.3	366.7	700	133.3	233.3	0	0
1422000	1399000	3323000	194700	3467	167900	206700	7073000	4701	1400	3067	57280	32860	500	2800	8437	2100	1867	333.3	500	566.7	533.3	1233	1167	933.4	366.7	500	433.3	900	100	333.3	33.33	66.67
1618000	1388000	3222000	195400	3634	187100	216300	7136000	4334	966.7	2700	65470	35400	766.7	2867	9138	1567	1834	600	766.7	733.4	500	1333	866.7	1067	333.3	766.7	500	800	133.3	233.3	0	100
1603000	1531000	3295000	212900	3101	197700	188300	7008000	3401	1333	3000	66780	30890	733.4	2600	7803	1633	1767	566.7	800	566.7	733.4	1367	1067	933.4	666.7	566.7	366.7	366.7	66.67	233.3	66.67	66.67
1545000	1610000	3396000	204800	4468	191100	190100	6436000	3501	1233	2434	66980	32020	633.4	2700	8871	1567	2234	533.3	666.7	866.7	766.7	1033	1300	1167	600	1067	433.3	566.7	100	200	33.33	0
1548000	1620000	3383000	198300	3767	205000	229400	8621000	3867	633.4	3201	71410	38820	666.7	3734	11940	2167	2400	766.7	1267	1033	800	1733	1100	1600	300	700	433.3	600	33.33	166.7	33.33	33.33
1678000	1638000	3154000	190100	4368	196100	213800	7687000	4234	1233	3234	67580	42300	1100	2900	12540	1967	2234	600	1067	1233	1033	1200	1567	1700	300	866.7	666.7	1067	200	100	100	133.3
1794000	1832000	3505000	221800	3134	210800	218800	8729000	4668	1067	3267	67620	39150	833.4	3134	9572	2400	2534	733.4	433.3	700	533.3	1400	1533	1167	366.7	500	766.7	933.4	133.3	366.7	33.33	33.33
1540000	1772000	3061000	214000	3801	203200	238000	9260000	4401	900	3567	58660	37640	433.3	3234	10640	2334	1700	500	800	1033	966.7	1267	1633	1033	566.7	733.4	633.4	700	133.3	300	200	66.67
1669000	1740000	3202000	239400	3934	202200	256700	10560000	4801	933.4	4301	68560	38950	1133	3534	9672	2300	1867	533.3	733.4	833.4	1033	1400	1333	1400	766.7	600	366.7	700	200	266.7	0	33.33
1528000	1702000	2941000	206300	3867	172600	253900	9048000	4234	1400	4334	59390	36670	633.4	3234	10270	2167	1733	466.7	666.7	900	733.4	1667	1167	1100	633.4	766.7	600	800	100	433.3	33.33	0
1392000	1535000	2851000	217300	4001	176800	227900	9797000	4801	1333	3534	61740	38550	700	2834	11240	2500	1934	600	933.4	1000	1067	2334	1167	1500	700	900	466.7	800	200	366.7	100	0
1874000	1756000	3624000	235000	3501	198300	269800	11650000	7169	1267	4434	68360	45150	1100	4234	15410	2867	2667	766.7	1133	1000	1500	2100	1700	1367	366.7	766.7	733.4	1200	133.3	233.3	100	0
1589000	1329000	2743000	188800	3867	157400	215400	8839000	5135	1167	3301	53760	33660	833.4	3534	10040	2500	2034	566.7	800	433.3	1133	1000	1200	1233	533.3	633.4	400	500	166.7	500	33.33	0
1574000	1545000	3085000	202400	3501	179600	238200	9650000	6202	1300	4001	67080	36270	466.7	3234	11270	2267	2167	833.4	1067	766.7	1400	1667	1633	1600	433.3	833.4	466.7	900	200	366.7	100	133.3
1652000	1654000	2990000	197900	3000	184400	226200	9065000	4935	1033	3601	58080	33900	666.7	2900	10210	1800	2267	533.3	466.7	966.7	666.7	1633	1333	1233	533.3	766.7	433.3	866.7	100	333.3	100	33.33
1596000	1712000	3029000	220600	3567	189900	242200	9096000	5535	1333	3334	56240	38380	533.3	3000	10270	2667	2167	633.4	733.4	733.4	966.7	1333	1934	1367	733.4	766.7	466.7	1033	33.33	233.3	166.7	0
1562000	1650000	2994000	202000	3834	183500	235600	8899000	5835	1400	3734	62350	41390	700	3534	9705	1967	2334	733.4	833.4	1000	900	1333	1000	1100	533.3	900	633.4	566.7	0	200	33.33	0
1430000	1543000	2863000	180700	3134	173400	209200	8186000	4001	1133	3301	55130	35170	433.3	2334	8404	2000	1367	566.7	1067	733.4	833.4	1133	1467	1333	366.7	533.3	500	566.7	133.3	166.7	100	33.33
1412000	1555000	2749000	183700	3801	159900	190800	7735000	3867	1233	2534	54530	29820	333.3	2200	7403	1567	1800	700	800	666.7	933.4	966.7	1200	966.7	566.7	600	300	666.7	33.33	166.7	33.33	33.33
1422000	1663000	2895000	200200	4234	183900	216500	8521000	5802	1367	3267	60470	34000	433.3	2934	10640	2134	2467	466.7	900	700	1200	1700	1233	966.7	566.7	633.4	700	766.7	66.67	200	133.3	33.33
1670000	1559000	3019000	201500	3634	174600	215800	8785000	4768	1000	3367	54760	35670	533.3	3000	9705	2067	2067	633.4	633.4	566.7	1067	1000	1000	1433	566.7	933.4	533.3	733.4	133.3	333.3	200	33.33
1764000	1345000	2661000	161300	3567	151300	214200	8472000	3968	1233	2700	58320	36470	900	3367	10540	2167	2200	500	766.7	500	1067	1633	1133	1367	566.7	766.7	433.3	866.7	100	200	133.3	100
1207000	1469000	2301000	156700	3734	152200	189500	7808000	5402	1067	3034	45980	32260	333.3	2700	9438	2000	1800	433.3	666.7	566.7	900	1300	1033	733.4	500	800	533.3	466.7	0	200	66.67	33.33
1383000	1685000	2788000	226900	3934	184400	240400	8690000	4835	1133	3434	63660	33860	600	2334	8971	1867	1367	633.4	633.4	600	700	1100	1000	1167	533.3	800	333.3	733.4	66.67	200	66.67	0
1420000	1501000	2921000	190100	3401	181200	191500	7983000	4601	1033	2200	61810	31660	300	2000	8871	1267	1967	500	600	966.7	566.7	1367	1133	900	466.7	766.7	300	766.7	66.67	66.67	166.7	33.33
1342000	1233000	2914000	171300	3034	163000	171400	6636000	3167	833.4	3067	56070	28380	666.7	2267	6936	1200	1600	633.4	700	733.4	700	1667	733.4	966.7	300	533.3	400	633.4	66.67	133.3	66.67	0
1415000	1296000	3016000	168700	3601	160500	173900	5735000	2600	1167	2767	63890	25640	433.3	1800	6836	1433	1633	333.3	566.7	666.7	833.4	966.7	766.7	800	200	500	366.7	266.7	233.3	266.7	100	0
1510000	1086000	4048000	189200	3234	197000	127700	4979000	2267	1067	2667	73630	16920	266.7	1133	5135	933.4	1000	466.7	433.3	566.7	300	700	566.7	333.3	266.7	400	133.3	266.7	66.67	100	66.67	0
1376000	802800	4084000	159100	3267	167900	81190	3329000	1533	1567	2767	63590	11770	366.7	733.4	4201	666.7	700	366.7	400	333.3	333.3	466.7	266.7	466.7	133.3	166.7	66.67	233.3	66.67	166.7	0	0
1319000	483100	4138000	154100	3401	164700	71380	3155000	2134	966.7	2067	89070	12210	533.3	1167	3601	866.7	700	133.3	433.3	333.3	266.7	466.7	500	800	333.3	366.7	333.3	200	0	166.7	0	0
1636000	860000	4344000	182500	3901	174800	135900	5627000	3234	1100	3434	60630	21090	666.7	1967	6736	1100	1333	433.3	733.4	466.7	533.3	1067	733.4	733.4	233.3	433.3	400	300	33.33	100	33.33	33.33
1399000	946800	3050000	178900	2934	137400	164300	5887000	3134	1033	3968	50140	24470	300	2334	6602	900	1200	400	333.3	400	400	766.7	433.3	366.7	300	266.7	233.3	333.3	33.33	100	0	0
812800	428900	1255000	67890	2934	63390	55540	2702000	1267	966.7	3267	22960	8804	233.3	600	2400	566.7	500	66.67	166.7	66.67	100	233.3	200	233.3	33.33	66.67	233.3	100	0	33.33	33.33	0
461500	243500	853300	45150	3701	43940	32160	1376000	733.4	900	2800	13410	6135	233.3	266.7	1400	333.3	233.3	133.3	100	66.67	66.67	200	100	100	66.67	133.3	133.3	66.67	66.67	66.67	33.33	0
381500	184200	627400	32960	3701	32660	24430	986500	300	1100	2534	9605	3901	33.33	300	1200	166.7	100	0	33.33	33.33	166.7	200	166.7	100	0	200	66.67	0	0	33.33	0	0
383000	149500	510900	28080	2800	24930	23660	924800	266.7	933.4	2334	9205	2934	66.67	466.7	633.4	166.7	166.7	66.67	133.3	100	33.33	33.33	66.67	0	66.67	66.67	33.33	100	33.33	66.67	0	0
429500	155700	472900	29650	2600	23260	21490	877600	533.3	1200	2500	10910	3501	66.67	266.7	966.7	366.7	200	66.67	66.67	33.33	100	166.7	133.3	100	33.33	66.67	133.3	266.7	33.33	33.33	0	0
355300	139500	436200	27140	3134	23400	20260	774100	633.4	1233	2267	7637	2867	33.33	166.7	933.4	33.33	133.3	33.33	66.67	100	66.67	66.67	100	100	66.67	0	0	33.33	0	66.67	0	0
320100	100200	319900	22130	2534	16250	15850	632200	333.3	966.7	2634	5402	1934	33.33	100	433.3	66.67	166.7	33.33	0	0	66.67	133.3	33.33	66.67	100	33.33	33.33	33.33	66.67	0	0	0
281000	72420	231000	13480	3000	13210	11810	413600	366.7	966.7	2634	3634	1433	0	266.7	300	100	133.3	0	66.67	0	0	66.67	100	33.33	33.33	0	33.33	0	0	66.67	0	0
249300	56780	149400	10470	3467	10740	7570	305800	166.7	966.7	2400	2667	800	133.3	133.3	133.3	33.33	33.33	0	0	33.33	33.33	33.33	33.33	66.67	33.33	0	0	0	0	0	0	0
242600	32290	104200	9071	3634	7103	5235	226500	166.7	1033	2767	1867	800	33.33	100	133.3	66.67	33.33	0	0	0	33.33	66.67	0	0	33.33	0	0	33.33	0	33.33	0	0
223200	22590	65370	7436	2934	5969	3434	178000	200	1000	1934	1233	700	0	33.33	0	33.33	66.67	0	33.33	0	0	0	33.33	33.33	0	0	0	66.67	0	33.33	0	0
207100	18720	55300	7069	3101	5268	2800	103900	200	600	1967	966.7	433.3	0	0	66.67	33.33	33.33	33.33	0	0	33.33	66.67	0	0	0	0	0	0	33.33	0	0	0
211100	11170	40290	6035	2967	4334	2334	83750	166.7	800	2000	733.4	266.7	0	0	100	0	33.33	0	0	0	0	0	0	0	0	0	0	0	0	0	0	0
196500	9572	24530	5568	3034	4568	866.7	64730	66.67	933.4	2134	600	300	0	0	33.33	33.33	0	0	0	0	0	33.33	33.33	0	0	0	0	0	0	100	0	0
195600	7270	31760	5035	3434	4034	1000	63920	100	1033	2034	433.3	66.67	0	33.33	66.67	66.67	0	0	0	0	0	0	0	0	0	0	0	33.33	0	33.33	33.33	0
194500	7403	13140	4601	3134	3501	933.4	33360	133.3	866.7	2234	166.7	133.3	0	0	33.33	0	0	0	0	0	0	0	66.67	0	0	33.33	0	0	0	33.33	0	0
192800	5101	11440	5602	2867	3501	800	31190	100	966.7	2134	100	200	0	0	33.33	33.33	0	0	0	33.33	0	0	66.67	0	0	0	0	33.33	0	66.67	0	0
195300	4968	9805	4268	2800	3767	333.3	24330	100	1000	1867	66.67	166.7	0	0	0	0	0	0	0	0	0	0	0	0	0	0	0	0	0	66.67	0	0
194800	2167	5835	4234	3801	3301	300	36440	66.67	1033	2200	400	66.67	0	33.33	100	0	0	33.33	0	0	0	0	0	0	0	0	0	0	0	66.67	0	0
193900	2200	6269	4601	2967	4068	433.3	15610	66.67	1167	2500	33.33	66.67	0	33.33	66.67	0	0	0	0	33.33	100	0	0	0	0	0	0	0	0	0	0	0
194400	1567	3634	3601	3167	3701	366.7	18750	133.3	966.7	2000	100	33.33	0	0	0	0	33.33	0	0	0	0	0	0	0	0	0	0	0	0	66.67	0	0
190100	1633	1867	3834	3267	3334	233.3	16080	66.67	833.4	1867	33.33	66.67	0	0	33.33	0	0	0	0	33.33	0	0	0	0	0	0	0	0	0	66.67	0	33.33
190500	1934	4234	3201	3501	3334	400	11840	66.67	866.7	2100	33.33	166.7	0	0	0	0	0	0	0	0	0	0	0	0	0	0	0	0	0	33.33	0	0
188500	833.4	2234	3834	3101	2634	200	15080	200	900	2100	0	0	0	0	0	0	0	0	0	0	0	0	0	0	0	0	0	0	0	0	0	0
193300	633.4	4268	4168	3234	3367	233.3	12170	0	1000	2300	66.67	0	0	0	0	0	0	0	0	0	0	0	0	0	0	66.67	0	0	0	0	33.33	0
189300	1200	2434	2967	2767	2967	0	12340	100	900	1834	0	0	0	0	0	0	0	0	0	0	0	0	0	33.33	0	0	0	0	0	0	0	0
200100	1033	1533	4601	2567	3334	100	9105	100	966.7	1967	200	66.67	0	0	0	0	0	0	0	0	0	0	0	0	0	0	33.33	0	0	0	0	0
186400	166.7	3267	3834	3401	2967	66.67	9138	0	766.7	2867	0	33.33	0	33.33	0	0	0	0	0	0	0	0	0	0	0	0	0	0	0	33.33	0	0
187600	166.7	1233	4101	3101	3634	100	8971	200	1000	2267	33.33	33.33	0	0	0	0	0	0	0	0	0	0	0	0	0	0	0	0	0	33.33	0	0
192000	233.3	1333	3834	2867	4034	33.33	8604	33.33	866.7	2400	0	0	0	33.33	0	33.33	0	0	0	0	33.33	0	0	0	33.33	0	33.33	0	0	0	0	0
188800	300	1667	3467	3067	3234	33.33	9905	133.3	766.7	2334	33.33	0	0	0	0	0	0	0	0	0	0	0	0	0	0	0	0	0	0	33.33	66.67	0
194700	266.7	1167	3968	3534	3367	33.33	9405	33.33	1000	2667	66.67	66.67	0	0	33.33	0	0	0	0	0	0	0	0	0	0	33.33	0	0	0	0	0	0
189600	466.7	2000	4334	3401	3267	100	8204	166.7	733.4	2134	0	0	0	33.33	33.33	33.33	0	0	0	0	0	0	33.33	0	0	0	0	0	0	0	0	0
186700	533.3	2500	3901	2734	3334	33.33	8604	33.33	1100	2134	0	0	0	0	0	33.33	0	0	0	0	0	0	0	0	0	0	0	0	0	33.33	0	0
LA-map-VEMA-7 29/12/2016 12:47:13 (Run: 1)
186800	66.67	1100	4168	3801	3301	66.67	8437	66.67	633.4	2300	0	0	0	0	0	33.33	0	0	0	0	0	0	0	0	0	0	0	0	0	66.67	0	0
183500	0	1400	4034	3067	2967	66.67	7503	133.3	1167	2634	0	0	0	0	0	0	33.33	0	0	0	0	0	0	0	0	0	0	0	0	0	0	0
181900	0	1767	4168	2600	2967	33.33	8671	66.67	933.4	2500	0	0	0	0	0	0	0	0	0	0	33.33	0	33.33	0	33.33	0	0	0	0	33.33	0	0
189400	233.3	1033	4368	3534	3134	33.33	7970	66.67	1233	2000	0	0	0	0	0	0	0	0	0	0	0	0	0	0	33.33	33.33	0	0	0	66.67	0	0
188500	0	1400	3634	3134	2634	33.33	8904	33.33	933.4	1934	33.33	0	0	0	0	0	0	0	0	0	0	0	0	0	0	0	0	0	0	133.3	0	0
188300	166.7	933.4	4768	2934	3801	33.33	6502	100	800	2134	0	0	33.33	0	0	0	0	0	0	0	0	0	0	0	0	0	0	0	0	0	0	0
183300	100	1233	3467	3267	3401	33.33	8838	100	733.4	2167	0	0	0	0	0	0	0	0	0	0	0	0	0	0	0	0	33.33	0	0	66.67	0	33.33
183600	66.67	1367	3767	2800	2867	33.33	9305	66.67	1067	1600	0	0	0	0	0	0	0	0	0	0	0	0	0	0	0	0	0	0	0	66.67	0	0
186700	0	1300	3701	3134	2634	100	8471	33.33	966.7	2334	0	0	0	0	0	0	0	0	0	33.33	0	0	0	0	0	0	0	0	0	0	0	0
182300	233.3	1033	4368	2434	2834	66.67	8004	100	766.7	1700	0	0	0	0	0	0	0	0	0	0	0	0	0	0	0	0	0	0	0	33.33	0	33.33
185100	133.3	866.7	4134	3234	3034	0	8037	100	1000	2000	0	0	0	33.33	0	0	0	0	0	0	0	33.33	0	0	0	0	0	0	0	33.33	0	0
187300	133.3	1167	4401	3234	2867	33.33	8337	33.33	1033	1867	0	0	0	66.67	0	0	0	0	0	0	0	0	0	0	33.33	0	0	0	0	0	0	0
188300	33.33	1333	3301	3067	3501	0	8838	33.33	1033	1834	0	0	0	0	0	0	0	0	0	0	0	0	33.33	0	0	0	0	0	0	66.67	0	0
188800	33.33	1200	3867	3034	2700	33.33	8270	66.67	1033	2500	0	0	0	0	0	0	0	0	0	0	0	0	0	0	0	0	0	0	0	0	0	33.33
188500	66.67	1400	4534	3401	3434	33.33	8237	66.67	800	2367	0	0	0	0	0	0	0	33.33	0	0	0	0	33.33	0	0	0	0	0	0	0	0	0
184700	66.67	1000	3867	2467	3201	100	7503	33.33	966.7	1967	33.33	0	0	0	0	33.33	0	0	0	0	0	0	0	0	0	0	0	0	0	100	0	0
193600	33.33	1167	3734	3101	3634	33.33	8104	33.33	1133	2267	0	0	0	0	0	0	0	0	0	33.33	0	0	0	0	0	0	0	0	0	0	0	0
184600	66.67	1367	3901	2434	3201	66.67	7003	66.67	900	2400	0	33.33	0	33.33	0	0	0	0	0	0	0	0	0	33.33	0	0	0	0	0	33.33	0	0
189200	133.3	1133	3667	3367	2667	66.67	7370	66.67	733.4	2300	0	0	0	0	0	0	0	0	0	0	0	0	0	0	33.33	0	0	0	0	33.33	0	0
181700	33.33	1133	3801	2800	3101	0	7270	33.33	1033	2300	0	0	0	33.33	0	0	0	0	0	0	0	0	0	0	33.33	0	0	0	0	0	0	0
184800	66.67	700	3501	3000	2734	66.67	7036	33.33	833.4	2034	0	0	0	33.33	0	0	0	0	0	0	0	0	33.33	0	0	0	0	0	0	0	0	0
189900	100	1067	4635	3067	3434	100	8504	133.3	700	2167	33.33	0	0	0	0	0	0	0	0	0	0	0	0	0	0	0	0	0	0	66.67	0	0
188800	66.67	1433	3567	3201	2800	66.67	7803	66.67	833.4	2000	0	0	0	0	0	0	0	0	0	0	0	0	0	0	0	0	0	0	0	66.67	0	0
183300	33.33	1000	4034	3501	3901	33.33	8304	66.67	1067	2067	0	0	0	0	0	0	0	0	0	0	0	0	0	0	0	0	0	0	0	0	0	0
190500	133.3	1367	3467	2934	2900	66.67	8904	0	933.4	2000	300	266.7	0	33.33	233.3	0	0	0	0	33.33	33.33	0	100	0	33.33	33.33	0	0	0	33.33	0	0
214700	29750	48930	5735	3067	6836	2600	158900	100	766.7	1767	800	1100	0	100	600	100	100	0	66.67	66.67	0	0	66.67	33.33	0	66.67	33.33	0	0	100	0	0
226500	39150	85230	13510	2800	8037	6536	269200	533.3	700	1834	1633	933.4	33.33	133.3	366.7	133.3	0	33.33	66.67	166.7	66.67	100	100	100	66.67	100	33.33	66.67	66.67	66.67	0	0
306700	112100	348700	23600	3367	23860	27980	906100	766.7	1267	2267	6836	4868	100	500	2534	200	500	266.7	66.67	66.67	166.7	366.7	100	233.3	66.67	166.7	100	100	33.33	166.7	33.33	0
556400	310000	667100	48830	3667	46150	61980	2368000	1934	1033	2267	17450	14310	200	1700	4434	466.7	666.7	233.3	133.3	300	633.4	766.7	566.7	500	266.7	466.7	33.33	266.7	33.33	33.33	0	0
821800	636400	1326000	110300	3467	80720	124800	4460000	2967	966.7	2334	29850	22860	600	2300	7270	1867	1433	333.3	500	500	533.3	1100	833.4	766.7	266.7	566.7	300	433.3	0	133.3	0	66.67
1032000	1006000	2038000	146100	3201	134700	170900	5939000	3567	1033	2867	43740	28410	433.3	2800	7503	1834	766.7	433.3	433.3	633.4	400	1133	833.4	933.4	300	566.7	366.7	533.3	0	100	0	100
1295000	1129000	2886000	167600	3267	156200	178000	6134000	3667	1033	2867	57980	27810	700	2334	6803	1800	1200	566.7	466.7	566.7	633.4	1133	1267	766.7	500	566.7	300	333.3	66.67	266.7	33.33	0
1419000	1009000	3294000	161400	3201	165700	144600	4715000	3634	833.4	2567	60740	21190	666.7	1867	4735	1267	1300	466.7	333.3	333.3	233.3	866.7	733.4	533.3	266.7	533.3	266.7	300	0	100	0	0
1270000	793700	3814000	177100	3334	153900	98800	3929000	2834	1033	2767	60100	16280	566.7	1533	4268	533.3	900	133.3	433.3	66.67	466.7	300	366.7	366.7	300	600	166.7	200	33.33	100	0	0
1362000	584700	3724000	178900	3367	147700	75410	3179000	1867	766.7	3334	70240	12210	366.7	1233	2767	933.4	633.4	133.3	300	233.3	133.3	466.7	366.7	400	200	333.3	33.33	200	66.67	100	0	0
1433000	513100	4481000	176700	2767	167000	62450	3575000	1834	666.7	2534	90550	11070	566.7	566.7	2800	766.7	366.7	33.33	300	200	333.3	400	333.3	166.7	0	166.7	133.3	166.7	0	66.67	0	0
1471000	438400	4920000	174100	3234	185000	51140	3520000	1267	1300	2867	82710	8471	366.7	933.4	1700	400	400	100	133.3	233.3	166.7	366.7	133.3	233.3	166.7	66.67	100	233.3	33.33	166.7	0	33.33
1505000	333000	4809000	182800	3634	167500	38820	2725000	1033	866.7	2067	92770	7770	366.7	433.3	1967	433.3	333.3	100	233.3	300	300	200	200	233.3	133.3	266.7	166.7	100	0	333.3	0	0
1700000	277500	4978000	177000	3167	174500	33700	2462000	1133	966.7	2367	86540	6336	366.7	600	1934	366.7	133.3	133.3	200	100	300	366.7	166.7	33.33	66.67	100	66.67	66.67	33.33	233.3	0	0
2053000	259100	4657000	199600	3434	162000	34130	2308000	833.4	1333	2334	81970	5869	533.3	666.7	2200	166.7	466.7	0	200	33.33	266.7	100	100	0	66.67	66.67	166.7	66.67	33.33	166.7	0	0
1506000	220000	4992000	168400	4068	159600	36410	2519000	900	1167	3134	86440	5969	400	566.7	2234	566.7	166.7	233.3	100	0	233.3	200	233.3	133.3	133.3	33.33	33.33	233.3	0	66.67	0	33.33
1660000	227300	5358000	177400	3334	178100	42430	2622000	1300	1067	2734	88700	7770	433.3	866.7	2300	400	300	66.67	100	166.7	266.7	266.7	333.3	133.3	33.33	266.7	133.3	266.7	33.33	166.7	0	0
1576000	250700	5084000	184600	3601	191400	50770	2884000	1533	1133	2867	94860	7303	266.7	800	1834	633.4	466.7	66.67	166.7	133.3	133.3	266.7	266.7	133.3	166.7	200	33.33	133.3	0	133.3	33.33	0
1791000	251100	5235000	172200	3267	175700	55600	2720000	1367	1333	2734	87620	8337	400	900	2600	500	566.7	33.33	233.3	266.7	100	400	366.7	200	200	66.67	66.67	266.7	33.33	100	0	0
1822000	256300	4979000	198300	4101	170200	45280	2570000	1233	1200	3000	83380	7003	533.3	700	1834	333.3	233.3	133.3	200	166.7	166.7	33.33	133.3	300	33.33	166.7	33.33	133.3	0	133.3	0	0
1418000	207800	4880000	167900	3767	165600	41490	1980000	1433	1033	2834	90080	6402	500	500	1900	400	333.3	66.67	133.3	66.67	133.3	100	233.3	233.3	0	133.3	33.33	66.67	0	200	0	0
1659000	165200	5149000	164900	3301	185700	32260	2009000	1433	1133	2534	94660	5268	200	533.3	1900	233.3	200	33.33	266.7	133.3	100	333.3	33.33	66.67	66.67	100	33.33	33.33	66.67	66.67	66.67	0
1564000	187100	5650000	179200	3934	166800	34530	2481000	1200	1000	2734	88190	5768	200	833.4	1600	200	200	0	333.3	100	66.67	233.3	133.3	100	100	33.33	166.7	166.7	0	166.7	0	0
1669000	210400	4879000	145900	2934	173900	31690	2001000	1000	1067	2234	81930	5602	166.7	433.3	1267	433.3	200	200	33.33	200	200	200	233.3	333.3	100	33.33	0	66.67	0	66.67	0	0
1715000	335000	4406000	167200	2934	160200	46350	2332000	1367	700	2367	79850	7169	300	700	1900	333.3	466.7	33.33	400	100	33.33	200	166.7	466.7	100	133.3	133.3	166.7	0	33.33	33.33	0
1325000	479100	4160000	148800	3501	156600	67720	3434000	1633	1233	2467	76020	11610	433.3	866.7	2734	666.7	500	66.67	200	400	333.3	533.3	433.3	466.7	133.3	133.3	200	366.7	33.33	133.3	33.33	0
1391000	700000	3798000	155500	3734	162200	95530	4548000	2067	833.4	2534	70770	15710	466.7	1467	5335	933.4	800	266.7	200	300	366.7	800	700	800	266.7	466.7	266.7	300	33.33	133.3	0	66.67
1375000	943200	3496000	179400	3367	163800	136900	5851000	3034	1067	3000	70140	23300	300	1800	5302	1500	1100	266.7	600	366.7	633.4	1167	600	800	366.7	466.7	333.3	433.3	266.7	233.3	66.67	0
1496000	1115000	3479000	175800	3501	162000	162200	7455000	3934	733.4	2434	60870	24700	533.3	1834	6702	1767	1600	366.7	566.7	600	666.7	1300	566.7	1133	166.7	800	266.7	733.4	133.3	266.7	66.67	33.33
1432000	1202000	3387000	183600	3934	151800	175300	6902000	4068	1000	2534	64020	28850	800	2600	7703	1467	1767	300	566.7	666.7	633.4	1000	866.7	1200	433.3	266.7	500	700	133.3	33.33	66.67	33.33
1387000	1229000	3135000	179500	4268	156400	190200	7155000	4068	1333	2467	60940	28510	833.4	2767	8270	1467	2134	366.7	533.3	533.3	700	1200	1000	1033	366.7	766.7	333.3	666.7	100	300	0	133.3
1457000	1402000	3010000	174000	3867	166700	207800	7099000	3801	1100	2467	58150	31150	500	2534	7803	1500	1467	566.7	533.3	933.4	500	1133	1133	1133	300	566.7	333.3	733.4	33.33	166.7	100	0
1439000	1393000	3045000	164200	4201	164800	193000	7048000	4001	1033	2434	60570	30550	500	2334	7536	2167	1400	466.7	833.4	433.3	600	1033	1033	900	700	566.7	333.3	633.4	33.33	133.3	100	33.33
1511000	1425000	3191000	175800	3968	172600	203300	7147000	3834	1233	2734	61170	27910	633.4	2167	7870	1633	1267	566.7	600	633.4	766.7	1400	1100	1233	633.4	633.4	400	866.7	0	166.7	33.33	0
1527000	1469000	3198000	193700	3434	182400	209900	7361000	4168	933.4	2234	64330	27980	666.7	2267	7303	1767	1533	733.4	533.3	866.7	1033	1500	1600	900	433.3	466.7	400	633.4	66.67	166.7	133.3	66.67
1522000	1535000	3271000	191600	3401	197100	191000	7808000	4001	1200	2467	60800	27980	600	2167	7069	1800	2000	600	633.4	500	666.7	1567	1000	1300	666.7	766.7	266.7	533.3	66.67	233.3	66.67	0
1472000	1489000	3204000	187800	3867	186300	189600	7052000	3968	1333	2867	62450	29280	466.7	2100	7136	1533	1233	533.3	633.4	500	866.7	1200	1167	1100	233.3	666.7	300	600	100	333.3	33.33	0
1385000	1455000	3134000	194200	3267	176000	187600	7061000	3501	933.4	2234	59160	26910	500	1800	7370	1267	2067	433.3	400	666.7	666.7	1367	1000	966.7	400	466.7	366.7	533.3	66.67	200	0	0
1544000	1438000	2970000	177300	3334	170900	186500	6843000	3501	766.7	2300	54230	27580	400	2100	7770	1433	1567	600	633.4	733.4	1000	1167	1000	833.4	666.7	500	366.7	766.7	100	266.7	0	0
1413000	1339000	2789000	167000	3734	155600	187400	7306000	3968	966.7	1967	51210	31960	666.7	2334	7570	1834	1934	333.3	433.3	966.7	800	900	966.7	966.7	233.3	833.4	666.7	700	66.67	166.7	33.33	33.33
1430000	1358000	3013000	184100	3301	176100	201800	7755000	4935	1000	2167	59630	31050	700	1834	7169	1767	1400	333.3	833.4	733.4	700	1267	933.4	1000	466.7	733.4	266.7	500	133.3	266.7	33.33	33.33
1362000	1431000	2745000	175100	3067	160200	190400	7686000	4434	1233	2934	54970	29550	800	2000	8838	1700	1533	333.3	566.7	800	800	1133	1467	866.7	466.7	466.7	366.7	400	66.67	233.3	0	0
1311000	1275000	2723000	151500	3167	141900	187800	6913000	4668	1167	2600	51950	28280	700	2600	7036	1567	1200	300	500	466.7	566.7	833.4	1033	1267	400	800	300	566.7	0	66.67	33.33	0
1287000	1297000	2654000	166000	3334	156300	170900	7228000	4101	1067	1900	53620	27940	566.7	2200	7136	1500	1467	500	500	900	533.3	1333	1133	1067	400	800	600	500	166.7	66.67	66.67	33.33
1305000	1322000	2783000	169700	3501	159700	193400	7566000	4034	1067	2400	56510	30450	566.7	2567	8137	1633	1633	400	533.3	533.3	500	1267	800	1400	433.3	533.3	500	766.7	66.67	133.3	66.67	0
1458000	1502000	2760000	188500	3301	166300	190300	7657000	3434	1100	2100	58220	31150	366.7	2234	8104	2200	1467	433.3	733.4	500	966.7	1200	1167	1133	566.7	633.4	566.7	433.3	66.67	266.7	66.67	33.33
1384000	1383000	3066000	181700	3201	170900	194400	7221000	4168	1333	2334	59800	31420	733.4	2200	7803	1800	1200	533.3	700	900	666.7	1367	900	1100	466.7	600	566.7	700	66.67	0	0	0
1355000	1452000	3001000	166600	3801	174300	179600	7046000	3801	1100	2367	57580	28880	800	2567	8104	1433	1433	566.7	500	733.4	700	733.4	900	766.7	333.3	766.7	633.4	400	66.67	233.3	133.3	0
1244000	1423000	2761000	165300	3134	166400	175400	6585000	3501	866.7	2500	51910	27610	300	2300	6903	1600	1600	666.7	933.4	900	766.7	1100	1000	1000	466.7	500	400	800	233.3	200	100	33.33
1297000	1456000	2886000	170400	3467	169700	191800	6477000	3867	1067	2267	54870	28310	466.7	2200	7236	1400	1800	333.3	633.4	666.7	566.7	1133	1067	1233	433.3	366.7	266.7	566.7	66.67	33.33	133.3	0
1554000	1429000	3061000	171200	3567	178300	199800	6728000	3634	1267	2367	59260	29380	500	2367	8904	1400	1800	533.3	966.7	766.7	566.7	1067	1000	800	500	766.7	300	800	166.7	66.67	0	33.33
1342000	1241000	2813000	175400	3934	171300	183900	6726000	4434	866.7	2934	52080	30480	433.3	2067	8971	1967	1834	400	433.3	600	700	1400	800	1033	400	766.7	366.7	766.7	100	233.3	66.67	33.33
1356000	1336000	3264000	198100	3701	178400	198500	7020000	5068	833.4	3367	61270	29180	900	2934	8671	2134	1500	400	533.3	666.7	600	1100	1300	1400	433.3	700	366.7	566.7	100	133.3	33.33	0
1457000	1282000	3282000	169800	3901	173400	208600	7041000	4534	1333	2767	59330	32790	700	2500	9405	1800	2400	333.3	766.7	766.7	766.7	1167	933.4	1533	333.3	966.7	333.3	700	100	200	33.33	0
1451000	1262000	3209000	183100	3567	166200	192200	7658000	4668	1400	2200	57010	29950	533.3	2467	8504	1967	1567	433.3	900	666.7	766.7	1500	933.4	900	433.3	600	366.7	366.7	33.33	300	33.33	66.67
1510000	1361000	2912000	174100	4368	158600	194600	7161000	3801	1100	2634	55030	29550	466.7	2267	8070	1233	1700	333.3	533.3	600	533.3	1033	800	1067	533.3	566.7	633.4	500	33.33	133.3	66.67	0
1387000	1443000	3107000	177800	3701	168300	192500	7399000	3467	1167	2434	55540	28310	466.7	2534	6936	1500	1500	766.7	400	833.4	433.3	1267	1067	1400	566.7	433.3	400	533.3	100	233.3	66.67	0
1419000	1510000	3002000	183300	3101	173100	204700	8044000	4201	1267	3101	62380	33730	833.4	3034	9505	1633	2034	733.4	900	666.7	1000	1633	1633	766.7	566.7	700	366.7	1033	66.67	166.7	166.7	66.67
1732000	1609000	3511000	193200	3534	185200	218900	8083000	5068	733.4	2767	62820	38480	633.4	2934	10810	2167	2034	666.7	900	800	1100	1367	1467	1367	533.3	1100	366.7	766.7	166.7	333.3	100	33.33
1872000	1749000	3213000	205000	3634	177100	232400	9074000	5935	1200	2434	68460	46250	1000	4801	13440	2534	2534	600	800	966.7	666.7	1700	1433	1367	500	1000	600	966.7	133.3	333.3	33.33	33.33
1813000	1957000	3310000	220000	3968	183700	247600	9352000	5768	966.7	2467	63860	46080	1000	4468	12340	2867	2234	700	1067	1067	866.7	1467	900	1033	566.7	400	733.4	733.4	133.3	100	66.67	66.67
1510000	1738000	3126000	200000	3367	160100	236000	9440000	5302	1233	3467	62040	39750	800	4468	13140	2900	2100	633.4	666.7	933.4	900	1333	1333	1467	700	666.7	500	733.4	266.7	300	66.67	66.67
2043000	1901000	3161000	192800	2767	167700	215000	8985000	5035	1033	2767	57920	38280	700	3367	10670	2300	2634	566.7	633.4	600	900	1767	1667	1267	433.3	633.4	533.3	866.7	233.3	133.3	100	0
1934000	1938000	3108000	202000	4468	165200	221000	9242000	5235	1067	2867	62180	35230	666.7	3334	10640	2234	1467	400	800	833.4	1033	1400	1834	1233	533.3	833.4	333.3	833.4	100	333.3	166.7	33.33
1705000	1918000	3339000	224100	3901	179100	248800	9599000	4768	1433	2734	65600	41230	733.4	2834	10240	1633	2067	800	600	800	800	1200	1200	966.7	766.7	833.4	433.3	800	100	266.7	100	0
1565000	1950000	3325000	227300	3834	188700	245900	9336000	5068	1667	2934	66210	37710	566.7	2934	10370	1834	2267	366.7	633.4	800	1233	1567	1300	1333	566.7	733.4	466.7	400	66.67	200	100	33.33
1714000	1856000	3296000	212900	3234	199900	248800	8950000	4768	1200	2767	72560	35270	566.7	2167	10310	1834	1767	600	566.7	600	866.7	1767	1267	1000	800	833.4	533.3	700	100	233.3	33.33	166.7
1734000	1704000	4173000	227200	4101	211100	238500	8444000	3901	1400	2667	79280	33630	733.4	2634	8304	1800	1733	766.7	533.3	966.7	966.7	1167	1233	1133	366.7	733.4	266.7	666.7	66.67	100	100	33.33
1934000	1480000	5044000	230100	3301	242600	195000	6601000	3701	1100	2400	97120	24370	500	1900	6336	1567	1467	233.3	633.4	600	633.4	1000	933.4	833.4	366.7	533.3	266.7	733.4	66.67	166.7	33.33	0
1761000	1104000	5320000	221300	2867	233000	136900	4839000	2867	1267	2167	91660	19250	300	1867	5335	766.7	666.7	233.3	400	333.3	666.7	700	366.7	400	233.3	133.3	233.3	266.7	66.67	166.7	33.33	0
1599000	813500	4791000	197000	3101	197300	96410	3872000	1400	1100	2800	77530	13610	400	933.4	3067	566.7	800	233.3	133.3	366.7	333.3	433.3	300	466.7	266.7	300	333.3	366.7	0	100	33.33	0
1360000	607400	4430000	166100	3567	179000	78810	2542000	1767	1067	2400	73090	9805	300	800	2267	400	300	133.3	133.3	200	233.3	266.7	300	333.3	100	133.3	133.3	33.33	0	133.3	0	66.67
1544000	456100	4239000	139600	3767	160000	48130	1866000	933.4	1067	1934	65500	7103	300	700	2167	266.7	300	100	233.3	66.67	100	100	166.7	100	33.33	166.7	0	66.67	33.33	100	0	0
1164000	383300	4144000	142500	3801	145100	55000	2073000	1633	666.7	2467	65370	7236	166.7	766.7	2334	500	666.7	200	266.7	133.3	200	400	166.7	233.3	200	166.7	66.67	100	66.67	33.33	66.67	0
1251000	525500	3776000	140400	3667	145100	93070	2857000	1367	1233	3034	57410	11110	400	1033	3067	533.3	566.7	300	433.3	233.3	333.3	400	566.7	333.3	66.67	166.7	200	200	33.33	100	66.67	66.67
1192000	588200	3358000	131400	2467	142500	79040	3067000	1367	900	2200	57750	14110	266.7	1233	3601	466.7	866.7	266.7	300	533.3	400	466.7	500	300	166.7	666.7	133.3	200	66.67	100	0	33.33
1189000	738200	3362000	153400	3267	139100	81230	3152000	1934	1067	2534	51610	12340	166.7	766.7	3834	766.7	633.4	166.7	300	266.7	166.7	500	533.3	600	266.7	333.3	66.67	133.3	33.33	33.33	33.33	0
1079000	667700	3063000	140100	3567	128800	79310	3057000	1600	1067	2334	56610	12780	333.3	1000	2800	600	700	233.3	266.7	366.7	466.7	633.4	433.3	566.7	200	233.3	200	300	66.67	66.67	66.67	0
1278000	764100	3761000	146000	3067	167000	86580	3449000	1433	1100	2734	67520	13040	433.3	1400	4801	633.4	633.4	366.7	266.7	300	166.7	566.7	633.4	333.3	66.67	233.3	166.7	400	0	66.67	0	33.33
1767000	716400	5122000	192400	3601	204100	79310	3234000	1467	933.4	2600	85600	11270	433.3	966.7	3067	500	466.7	166.7	366.7	133.3	466.7	433.3	433.3	400	133.3	366.7	66.67	300	66.67	133.3	0	0
1666000	786100	5253000	206000	3134	210000	103500	4089000	2400	1067	2800	79650	18120	500	1767	6336	1267	1233	300	300	666.7	466.7	1000	500	633.4	200	166.7	233.3	266.7	133.3	33.33	166.7	66.67
1247000	754800	3513000	146400	3167	144900	100300	4175000	1800	733.4	2934	51650	19220	533.3	2400	7303	1533	1333	400	400	400	466.7	800	1033	900	200	466.7	333.3	533.3	33.33	133.3	66.67	33.33
1164000	617600	2498000	128900	3634	115500	120400	5055000	2967	833.4	3367	50570	33760	900	3834	11310	2134	1400	433.3	866.7	866.7	1167	1100	800	1133	666.7	766.7	633.4	1100	100	200	33.33	33.33
1327000	952300	2954000	159800	3567	142400	190600	8218000	5035	1400	4001	57010	56780	866.7	6202	16920	4001	3467	966.7	1433	1600	1467	2267	1900	1900	633.4	866.7	700	1033	266.7	366.7	133.3	66.67
1693000	1152000	3328000	213700	3601	164700	250900	10540000	6336	1533	3934	69600	65940	900	6869	21190	4268	3801	1100	1033	1233	1233	2167	1667	2000	1033	1033	633.4	1200	66.67	266.7	200	166.7
1669000	1329000	3554000	197900	3968	189200	253100	10520000	7270	1000	4301	67180	66540	1100	6469	18590	3367	3834	933.4	866.7	1333	1300	2034	2067	1700	800	1033	833.4	733.4	233.3	200	266.7	33.33
1669000	1476000	3888000	217900	3234	175600	272800	10240000	5735	1300	3667	75680	55400	900	5668	16720	2900	3267	966.7	1267	1567	1033	2234	1500	1900	800	800	700	1400	133.3	233.3	266.7	66.67
1855000	1664000	3922000	250700	3034	203500	273700	10480000	6736	1267	3834	79310	50200	833.4	6269	13610	2667	3067	833.4	900	1300	1267	1700	1700	1500	800	1000	866.7	966.7	166.7	266.7	100	66.67
1813000	1785000	3633000	222700	3801	210900	267100	10180000	5535	1400	3367	70100	44340	900	4101	13510	2367	2600	666.7	833.4	1167	1333	1834	1633	1467	466.7	1133	566.7	700	100	266.7	0	0
1716000	2087000	3510000	230500	3034	229800	271800	9950000	6336	1367	3367	69630	41630	833.4	3301	11340	2134	2834	766.7	733.4	933.4	500	1367	1100	1500	766.7	800	466.7	1133	66.67	266.7	100	33.33
1543000	2112000	3412000	201000	4034	226000	251300	9428000	5135	866.7	3067	56110	35940	466.7	3034	10210	2067	1500	500	1067	933.4	833.4	2167	1400	1700	600	566.7	466.7	733.4	100	200	66.67	33.33
1331000	2086000	2990000	220400	4501	236300	252500	9114000	5535	1400	3134	56370	38010	633.4	2767	9705	1667	1800	366.7	766.7	700	1167	1633	1834	1300	466.7	800	800	966.7	166.7	266.7	33.33	33.33
1434000	2194000	3080000	212800	3000	237400	267400	9535000	5168	1167	3334	63690	41560	533.3	3034	10710	2300	2400	800	1067	1000	1033	1533	1467	1467	500	1133	266.7	1133	133.3	166.7	133.3	100
1571000	2182000	3240000	221300	3701	228800	286500	9662000	5435	1133	2500	64930	41360	633.4	2600	8537	2334	2267	666.7	900	966.7	933.4	1533	1200	1033	366.7	633.4	366.7	766.7	66.67	200	133.3	0
1469000	1830000	3269000	189900	4068	216100	228900	7953000	4735	1700	2834	60330	32290	400	2167	7470	1600	1667	533.3	500	633.4	833.4	1167	1000	1267	366.7	533.3	500	700	133.3	200	66.67	33.33
1581000	1734000	3615000	212000	4068	210100	211900	7917000	4034	966.7	2767	66410	33330	500	2267	7536	1834	1133	566.7	700	766.7	1167	1567	966.7	900	366.7	633.4	400	466.7	200	333.3	0	0
1299000	1566000	3182000	193300	3134	192900	214900	7257000	4301	1433	3034	58120	29820	866.7	2600	8004	2067	1567	366.7	833.4	366.7	600	1533	1133	1233	466.7	466.7	466.7	433.3	200	266.7	66.67	33.33
1320000	1482000	3125000	183700	3834	185400	242500	8705000	5335	833.4	3534	63590	35300	633.4	2700	9772	1934	2067	600	766.7	900	1033	1400	833.4	1033	500	700	533.3	866.7	133.3	233.3	133.3	33.33
1968000	1511000	3183000	196600	3267	183700	284100	10100000	6069	966.7	3301	65030	40120	866.7	4234	13010	2367	2634	633.4	866.7	800	1033	1834	1567	1600	633.4	700	733.4	700	300	400	66.67	100
1712000	1496000	3426000	207200	3034	181500	318500	11540000	9004	1033	3401	65570	50880	1000	5101	15510	3201	3134	933.4	900	1300	933.4	2167	1633	1433	966.7	1100	766.7	966.7	266.7	333.3	166.7	33.33
2156000	1557000	3605000	230700	3401	192400	370400	12470000	9705	900	3067	70570	54330	1133	4801	17180	3801	3134	800	900	900	1000	1900	1834	1433	866.7	1033	800	1000	300	533.3	233.3	166.7
1773000	1434000	3737000	208500	4234	179500	375400	13220000	8871	1233	4601	68930	62680	1267	5702	18750	3701	3034	966.7	900	1333	900	2134	2300	2300	633.4	1167	933.4	1433	100	600	200	66.67
1809000	1439000	3387000	240800	3734	163400	368600	13100000	8738	933.4	3634	61980	56440	1167	5902	17250	3601	3267	600	1000	1033	1267	2067	1967	1834	533.3	1667	566.7	1000	266.7	433.3	133.3	33.33
2050000	1090000	2866000	185600	4534	141800	309400	11310000	8671	1267	3667	50710	48190	1100	5368	14610	3968	3067	866.7	700	1167	966.7	2100	1533	1533	733.4	1067	633.4	1067	266.7	366.7	166.7	133.3
1630000	988300	2658000	178000	3201	131500	297300	11970000	8070	1000	3867	54400	54830	1067	6602	19790	3434	2834	900	1167	1133	933.4	1733	1533	1433	933.4	966.7	833.4	1033	300	666.7	100	166.7
1563000	1158000	2728000	208200	3801	140700	340700	13100000	10440	966.7	3834	53220	63790	1367	6502	18650	4034	3634	1000	1533	1567	1267	2034	2134	1633	766.7	1100	833.4	1367	333.3	533.3	166.7	0
2179000	1466000	3300000	236400	3934	180200	408000	14220000	11070	1400	4268	63390	61040	1200	6702	21990	4468	4168	1267	1433	1667	866.7	2600	1967	2167	900	1500	1167	1233	400	533.3	233.3	100
2388000	1679000	3795000	234300	3801	219600	386800	14950000	10740	1200	3601	82610	65030	1233	6302	19820	4034	4268	1033	900	1500	1767	3201	2534	1967	1300	866.7	1167	1000	266.7	800	166.7	33.33
2787000	3655000	5397000	386800	5302	320100	499000	22720000	13410	1267	6369	104600	73970	1533	8170	25200	4601	4534	1200	1633	2067	2000	3067	1967	3067	1333	1533	933.4	1633	133.3	700	133.3	100
2633000	4984000	4184000	343200	4434	226200	331000	17030000	10070	1200	8704	78400	69330	1333	4134	14580	3134	2534	700	966.7	933.4	1000	2067	1533	1067	733.4	1033	600	1033	266.7	900	66.67	166.7
1380000	1670000	2349000	175700	4534	123700	178700	8854000	5402	1200	5468	39350	39890	500	2467	9004	1333	1767	400	533.3	666.7	633.4	833.4	666.7	666.7	433.3	566.7	366.7	500	100	200	33.33	0
956700	972800	1424000	107700	3934	79480	118600	5894000	3401	1200	3968	28580	30550	600	2100	5902	1500	1433	200	300	566.7	600	766.7	766.7	666.7	33.33	533.3	300	700	100	233.3	33.33	33.33
1014000	1112000	1663000	125100	3501	83520	122600	7014000	3701	1033	6069	36570	44310	566.7	3334	7403	1567	1433	300	233.3	633.4	466.7	1100	533.3	666.7	233.3	400	433.3	900	200	100	33.33	33.33
1159000	1242000	1760000	159200	3134	101700	125600	7904000	3434	833.4	7603	40890	48730	866.7	2234	7670	1700	1233	433.3	300	566.7	433.3	1167	900	633.4	466.7	333.3	300	500	166.7	366.7	100	33.33
1162000	1115000	1618000	142200	3401	93340	122000	6537000	3201	1200	5302	39890	39120	1067	2900	7737	2067	1567	433.3	566.7	566.7	666.7	1300	833.4	933.4	300	566.7	233.3	633.4	166.7	433.3	0	33.33
1277000	1287000	2261000	168000	3534	127100	180400	9350000	4968	1267	5935	63320	51140	1967	3401	12980	2900	2100	633.4	533.3	800	866.7	1500	1333	966.7	700	933.4	700	1133	200	1200	33.33	33.33
1975000	1757000	3281000	247100	4668	190500	239900	12300000	7903	1133	4935	86210	70710	3867	4901	14140	2634	2567	933.4	1067	833.4	1000	1700	1567	1867	700	1233	466.7	1567	433.3	1167	233.3	100
2719000	2111000	3947000	287900	3968	231700	318000	13870000	8537	1233	5535	94080	70470	3534	6803	16750	3834	3601	933.4	1300	1267	1400	2600	1834	1700	766.7	666.7	533.3	1467	366.7	900	166.7	100
2202000	2296000	4207000	287400	4501	238500	319900	13690000	8170	1067	4768	96410	67850	3101	4668	16720	3501	3567	966.7	1133	900	1267	2200	1867	1900	1133	1100	1033	1267	333.3	700	100	66.67
2374000	2165000	4134000	280600	4635	214600	291900	13090000	8204	900	4501	93580	59760	1733	5035	17280	2834	3034	866.7	866.7	1267	1533	1800	1467	1300	466.7	1067	700	1433	200	533.3	66.67	200
2071000	2021000	4017000	253300	4101	220200	283000	11860000	6936	1267	3467	84260	56040	1800	4468	13380	2600	2367	733.4	1200	866.7	1233	1967	2034	1400	600	900	533.3	966.7	166.7	300	200	100
1883000	1930000	3884000	240700	4001	201000	262500	11050000	6836	700	4001	80790	49530	1367	3467	13080	2434	2900	733.4	900	866.7	1300	1800	1367	1700	833.4	866.7	733.4	800	166.7	466.7	66.67	33.33
1790000	1888000	3742000	235200	3867	213500	269100	10490000	6235	1100	3801	70440	45680	1500	4468	12780	2600	2034	966.7	1000	1333	1367	1700	1600	1367	566.7	633.4	600	1167	366.7	366.7	133.3	66.67
1787000	2233000	3567000	242700	4735	218300	251100	10350000	5568	1267	3867	72290	45280	1267	3667	11770	2400	2867	600	533.3	933.4	966.7	2134	1233	1367	566.7	900	666.7	1267	100	433.3	66.67	33.33
1766000	2017000	3524000	234600	3968	209000	253500	9783000	6269	1100	3167	65870	41030	1333	3801	10940	2334	2467	666.7	866.7	500	1233	1700	1300	1167	833.4	633.4	566.7	766.7	100	633.4	33.33	66.67
1742000	1977000	3519000	218200	4001	217000	259100	9779000	5168	1500	2500	66440	40860	866.7	3567	10340	2567	2234	666.7	633.4	1100	1067	1467	1100	1367	633.4	833.4	700	1000	166.7	266.7	66.67	0
1621000	1955000	3505000	208300	3601	199600	253100	8841000	4868	1200	3201	70980	39790	866.7	3701	10940	2267	2167	400	866.7	866.7	900	1400	1467	1167	566.7	1000	566.7	666.7	166.7	133.3	0	33.33
1599000	1826000	3351000	222800	4201	202300	226700	8143000	4801	1567	3034	64290	37080	766.7	2800	8838	1834	2500	633.4	900	733.4	1367	1467	1200	1533	533.3	900	500	566.7	66.67	166.7	66.67	133.3
1454000	1620000	3226000	178800	3801	182500	211800	7766000	3934	1000	2534	64900	31620	900	2767	8004	2267	1367	666.7	566.7	800	1100	1400	1100	1433	533.3	766.7	233.3	500	33.33	300	100	100
1502000	1692000	3287000	207400	4168	179600	205300	8172000	4735	1567	3267	62850	36510	733.4	3267	9805	1900	1834	766.7	900	1000	1133	1467	1233	1700	866.7	800	833.4	866.7	133.3	366.7	100	0
1564000	1448000	3368000	214800	3634	180100	267500	9593000	5935	1200	2967	62750	39390	633.4	4434	14240	3134	2600	733.4	800	766.7	1000	1500	1167	1700	766.7	1000	466.7	633.4	66.67	333.3	166.7	0
1808000	1214000	3125000	207900	3701	147900	237400	9762000	6602	1400	3601	67680	47620	1500	5235	13910	2534	2234	500	966.7	833.4	866.7	1967	1600	1467	566.7	766.7	400	666.7	133.3	566.7	66.67	33.33
1618000	1073000	3344000	188700	4034	142200	211900	8490000	4935	1267	3767	64060	35100	1133	3267	9338	1800	2000	400	433.3	700	800	933.4	966.7	1000	266.7	466.7	300	400	66.67	466.7	200	33.33
1340000	908200	3423000	176000	4368	132500	154800	6245000	3534	1200	3034	64230	24670	700	2434	7003	1300	1100	533.3	333.3	866.7	333.3	733.4	866.7	666.7	266.7	333.3	300	333.3	166.7	133.3	33.33	0
1663000	836300	4389000	197100	3234	186200	128800	5202000	2967	1067	2600	83410	19450	833.4	1700	5335	1233	1133	266.7	466.7	366.7	500	800	700	833.4	233.3	133.3	533.3	300	33.33	200	0	0
1722000	1261000	4704000	216000	4301	222400	153600	5807000	3301	1100	3067	81560	27680	466.7	2534	6836	1733	1667	600	566.7	533.3	900	1333	1033	700	366.7	566.7	500	700	33.33	133.3	166.7	0
1392000	1154000	3514000	186700	3367	161400	141700	4997000	2967	966.7	2867	58550	23360	500	1767	5702	1400	1400	333.3	566.7	433.3	366.7	700	700	833.4	233.3	433.3	166.7	366.7	33.33	133.3	33.33	0
1493000	957800	4311000	182900	3134	177200	128500	4659000	2100	1867	2800	70540	18120	400	1900	5502	933.4	933.4	300	400	533.3	266.7	566.7	533.3	366.7	200	466.7	133.3	500	133.3	133.3	0	0
1609000	764900	4462000	187000	2800	190000	126200	4780000	3000	766.7	3134	75610	22690	400	1867	5869	1300	1333	300	433.3	433.3	500	1000	733.4	566.7	600	500	600	600	133.3	66.67	66.67	0
1953000	1370000	3998000	230600	3234	210200	194500	7084000	3734	733.4	3301	73630	29480	633.4	2300	8270	1667	1400	600	566.7	400	600	933.4	1267	766.7	400	666.7	300	1000	66.67	200	33.33	100
1375000	1354000	3404000	207700	3234	198200	182500	6580000	3134	1267	3201	65300	27510	800	2134	8371	1834	1733	933.4	566.7	533.3	633.4	900	1233	1133	400	866.7	466.7	666.7	100	166.7	66.67	0
1574000	1514000	3295000	223800	3867	190200	182700	6582000	3501	1233	2534	103700	28310	1433	2400	7203	1400	1267	600	666.7	833.4	666.7	1667	1367	1233	466.7	766.7	266.7	566.7	33.33	400	100	0
1477000	1574000	3190000	189100	3000	183000	186600	6508000	3634	1033	3034	98630	31420	1567	1967	6869	1800	1200	500	333.3	833.4	600	1167	1233	633.4	400	600	466.7	466.7	33.33	333.3	66.67	33.33
1559000	1630000	3412000	212600	3834	188800	199300	7329000	3601	1033	3267	82240	30820	1700	2567	8971	1767	1800	600	966.7	733.4	766.7	1433	1033	1233	400	400	600	600	133.3	366.7	33.33	0
1636000	1721000	3348000	202300	3601	182400	184600	7548000	4434	1200	3834	74270	34600	1500	2934	11510	1967	2034	400	600	700	666.7	1333	1100	1433	533.3	400	533.3	733.4	66.67	266.7	0	33.33
1623000	1381000	2989000	188600	4068	171000	193300	8653000	4768	1167	3968	71140	35600	1000	3034	12010	2100	2300	633.4	700	633.4	966.7	1233	1233	1200	300	566.7	700	566.7	166.7	400	0	66.67
1582000	1458000	3116000	226200	3801	179300	229400	8781000	5035	1433	3401	69160	36340	1433	3000	11070	2500	2500	666.7	466.7	833.4	1100	1500	1167	1700	733.4	833.4	533.3	633.4	133.3	133.3	0	33.33
1779000	1568000	3338000	211000	3067	191400	219700	8751000	5302	1100	4101	63450	34630	566.7	2734	10610	2267	2167	533.3	966.7	766.7	933.4	1533	1333	933.4	300	866.7	300	433.3	100	233.3	66.67	33.33
1707000	1444000	3160000	199900	3567	181000	207500	7959000	4301	1133	2800	60570	28310	1800	2434	7803	1400	1400	600	400	766.7	733.4	1500	966.7	1267	200	633.4	300	500	133.3	133.3	133.3	33.33
1271000	1289000	2772000	179100	3801	153600	167200	6506000	3167	1133	3401	55500	23560	666.7	1567	7470	1633	1667	433.3	700	700	966.7	1333	1033	933.4	433.3	666.7	466.7	633.4	100	166.7	166.7	0
1612000	1671000	3515000	222100	3867	200400	209900	7480000	4201	1333	3334	73830	31290	833.4	3034	9572	2067	1500	533.3	700	533.3	1167	1233	966.7	833.4	400	633.4	600	566.7	100	266.7	100	33.33
1364000	1305000	2776000	177800	3634	158100	174900	6962000	4301	1133	3567	61540	33290	600	2934	9405	1700	2034	433.3	700	966.7	900	1300	1000	1367	633.4	633.4	366.7	800	133.3	166.7	33.33	66.67
1434000	1602000	2922000	193200	3301	187000	266900	9200000	4068	1267	3367	63620	39750	766.7	3534	10340	2067	1733	433.3	466.7	466.7	600	1467	1200	900	500	833.4	600	700	100	200	66.67	33.33
1601000	1457000	2746000	167900	4034	157300	191000	7336000	3000	1067	3267	51680	28510	533.3	2200	7637	1733	1567	400	666.7	633.4	766.7	866.7	500	900	366.7	566.7	533.3	666.7	100	233.3	133.3	33.33
1554000	1701000	3220000	202400	3701	191000	210600	8271000	4534	900	3534	60000	32590	566.7	2067	8871	1500	1834	566.7	666.7	433.3	900	1200	933.4	866.7	400	266.7	533.3	666.7	66.67	166.7	0	0
1799000	1478000	2817000	171400	2900	158700	172400	7044000	3467	766.7	3434	54560	25800	700	1533	7270	1500	1400	666.7	666.7	566.7	633.4	833.4	966.7	966.7	400	933.4	333.3	600	100	233.3	66.67	33.33
1616000	1694000	3208000	201400	3767	189900	188300	7918000	3534	1033	2734	71010	31020	766.7	2334	7370	1800	1233	366.7	666.7	600	833.4	1033	900	766.7	433.3	333.3	200	500	100	233.3	0	33.33
1303000	1298000	2916000	186000	3401	164600	150000	5693000	2834	1333	2800	61740	22060	666.7	1433	5201	1233	933.4	266.7	566.7	400	300	733.4	600	533.3	400	433.3	366.7	300	133.3	100	0	0
1513000	919800	4541000	187400	3667	215700	102900	4301000	1767	1200	2434	86880	13810	500	1333	3934	833.4	966.7	400	366.7	333.3	533.3	666.7	366.7	500	200	300	166.7	366.7	33.33	33.33	0	0
1741000	693300	4548000	174400	3534	194400	75810	2989000	1567	1000	2400	80290	11070	333.3	1233	3534	833.4	500	133.3	133.3	100	266.7	466.7	266.7	233.3	66.67	266.7	200	133.3	0	200	0	0
1627000	614300	4277000	162000	4034	166600	74070	2906000	1700	900	3301	83750	11610	266.7	1000	3301	633.4	700	133.3	233.3	266.7	300	500	466.7	333.3	66.67	333.3	166.7	133.3	33.33	66.67	33.33	33.33
1243000	570200	3750000	152300	3067	169600	79680	3210000	1233	1167	3134	77660	12310	533.3	866.7	4068	900	600	200	300	233.3	233.3	733.4	366.7	266.7	100	166.7	200	133.3	0	133.3	0	0
1245000	651600	4063000	159100	3767	172600	85630	3476000	1834	1067	2334	64490	12010	300	1000	3601	666.7	766.7	166.7	433.3	300	300	533.3	300	400	233.3	300	133.3	333.3	0	33.33	33.33	33.33
1456000	622800	3902000	166400	3667	168500	97050	4076000	2434	1300	2767	64330	10940	300	733.4	3234	900	833.4	66.67	400	333.3	300	433.3	366.7	433.3	33.33	400	266.7	400	133.3	266.7	33.33	0
1283000	720500	3735000	162800	3601	159400	96750	3938000	1967	966.7	2634	57580	14380	66.67	1300	3801	600	633.4	433.3	466.7	100	300	566.7	566.7	700	366.7	333.3	133.3	200	33.33	166.7	0	0
1423000	880500	3711000	167300	3367	163000	135400	4605000	1467	900	3401	63150	17880	300	1467	4601	666.7	633.4	133.3	266.7	133.3	633.4	533.3	333.3	300	433.3	233.3	100	100	0	166.7	0	0
747100	387300	1596000	76390	3367	68690	42770	1614000	766.7	1400	2300	23600	4468	166.7	266.7	1600	533.3	266.7	133.3	33.33	100	266.7	166.7	100	200	100	100	33.33	33.33	0	66.67	0	0
458300	175900	816000	41430	2734	40990	21290	777400	333.3	1333	1867	13540	2767	33.33	200	566.7	100	133.3	33.33	33.33	33.33	0	66.67	66.67	100	33.33	0	33.33	33.33	0	66.67	0	0
387000	152100	665900	36710	3301	28980	14650	842300	300	933.4	3134	10710	2100	100	233.3	600	100	133.3	0	66.67	33.33	33.33	66.67	0	0	33.33	33.33	0	66.67	0	33.33	0	0
363700	97590	535800	27740	3101	25130	12710	506500	366.7	1100	2300	10740	1934	33.33	200	233.3	33.33	66.67	33.33	0	66.67	33.33	233.3	33.33	166.7	33.33	33.33	33.33	0	33.33	0	0	0
345500	90750	619700	22030	2967	22660	11870	465900	433.3	966.7	2067	8938	1733	66.67	100	366.7	133.3	266.7	66.67	133.3	0	0	33.33	66.67	0	100	66.67	0	0	0	0	0	0
315500	79850	433000	19650	2867	23360	10170	441200	200	966.7	2267	6803	1733	0	100	333.3	66.67	66.67	33.33	66.67	66.67	0	33.33	33.33	33.33	0	100	33.33	33.33	66.67	200	0	0
301200	61680	382800	16010	3401	16780	8204	362400	166.7	833.4	2634	5435	1000	100	66.67	433.3	0	66.67	0	33.33	66.67	33.33	0	0	100	0	0	33.33	33.33	33.33	33.33	0	0
266800	39950	228600	14910	2634	12040	6002	226100	166.7	966.7	2300	2900	533.3	0	33.33	166.7	66.67	0	0	33.33	0	0	66.67	33.33	0	33.33	0	0	0	0	66.67	0	0
239200	35340	163200	10410	2834	9839	4668	156100	200	966.7	2767	2034	400	0	33.33	66.67	66.67	66.67	0	0	0	33.33	0	0	66.67	0	0	0	0	0	33.33	0	0
225800	25670	114000	9638	3134	7103	3567	111500	66.67	966.7	2200	1533	600	0	33.33	133.3	33.33	0	0	33.33	0	0	33.33	0	0	0	0	0	33.33	33.33	0	0	0
212200	17950	95970	8037	3101	6369	3267	80620	66.67	1000	2834	1900	333.3	0	0	66.67	0	33.33	0	0	0	0	0	0	33.33	0	0	0	0	0	133.3	0	33.33
197500	11540	58520	6336	2934	7403	1567	52650	100	1500	1767	566.7	133.3	0	0	66.67	0	66.67	0	0	0	0	0	33.33	33.33	0	0	0	0	0	0	0	0
199100	8337	38310	5735	3301	4868	1667	48090	133.3	1133	2534	300	66.67	0	0	33.33	33.33	0	0	0	33.33	0	0	33.33	0	33.33	0	33.33	0	0	133.3	0	0
196600	8537	32960	5435	3167	3834	933.4	35570	66.67	1100	2300	466.7	100	33.33	33.33	0	0	66.67	0	0	0	0	0	0	0	0	0	0	0	0	33.33	0	33.33
193100	3201	23400	4568	3167	3901	800	23530	66.67	900	2134	433.3	100	0	33.33	0	0	0	0	0	0	0	33.33	0	0	0	0	33.33	33.33	0	33.33	0	0
186000	3301	12580	3667	3034	3901	666.7	23800	66.67	1333	2367	100	100	0	0	0	33.33	0	0	0	0	33.33	0	0	0	0	0	0	0	0	66.67	0	33.33
188100	3201	10810	4935	3134	3701	500	20260	33.33	800	2267	200	33.33	0	0	33.33	0	0	0	33.33	0	33.33	0	0	0	0	0	0	0	0	0	0	0
189800	1834	11210	4768	2634	3701	333.3	19520	66.67	833.4	2567	300	33.33	0	33.33	33.33	0	0	0	0	0	0	0	0	0	33.33	0	0	0	33.33	33.33	0	0
189700	1467	7036	4334	3067	3167	400	19450	100	1133	1934	66.67	0	0	0	0	0	0	0	0	0	0	0	0	0	0	0	0	0	0	33.33	0	0
190300	1500	7737	3867	3034	3667	366.7	15810	100	700	2334	333.3	33.33	0	0	0	0	0	0	0	0	0	0	0	0	0	0	0	0	0	0	0	0
187100	1333	4601	4668	3234	3434	200	17050	33.33	833.4	2267	133.3	0	33.33	0	0	0	0	0	0	0	0	0	33.33	0	0	0	0	0	0	0	0	0
192100	1233	3201	3734	3401	3067	133.3	10010	100	1100	2534	33.33	0	0	0	0	33.33	0	0	0	0	0	0	0	0	0	0	0	0	0	100	0	0
192200	1167	5101	3901	3567	3201	200	14140	33.33	1133	2134	133.3	0	0	0	0	33.33	0	0	0	0	0	0	0	0	0	33.33	0	0	0	33.33	0	0
185100	1133	2100	4168	3267	3401	100	9038	133.3	966.7	2134	66.67	33.33	0	0	0	0	0	0	0	0	0	0	0	0	0	0	33.33	0	0	100	0	0
185900	966.7	1867	4334	3334	3401	66.67	10410	66.67	833.4	2534	66.67	0	0	0	0	0	0	0	0	0	0	0	0	0	0	0	0	0	0	133.3	0	0
186700	400	2134	4268	3000	3134	0	9338	100	733.4	2634	0	0	0	0	0	0	0	0	0	0	0	0	33.33	0	0	0	0	0	0	33.33	0	0
184000	266.7	1100	3801	3301	2834	33.33	11940	66.67	766.7	1567	66.67	0	0	0	0	0	0	0	0	0	0	0	0	0	0	0	0	0	0	0	0	0
188000	333.3	1900	4468	3501	2800	166.7	6936	33.33	1167	2200	0	0	0	0	0	0	0	0	0	0	0	0	0	33.33	0	0	0	0	0	133.3	0	0
185700	300	1767	3934	2867	2734	133.3	11370	33.33	800	2334	33.33	0	0	0	0	0	0	0	0	0	0	0	0	0	0	0	0	0	0	33.33	0	0
183200	300	1834	3667	2667	2234	33.33	8671	0	900	2434	33.33	0	0	33.33	0	0	0	0	0	0	33.33	0	0	0	0	0	0	0	0	0	0	0
188100	733.4	1400	4401	3134	2934	33.33	7136	100	1300	2067	33.33	0	0	0	0	0	0	33.33	0	0	0	0	0	0	33.33	0	0	0	0	0	0	0
186200	100	1900	4101	2567	2967	166.7	13710	100	1100	2334	33.33	0	0	0	0	0	0	0	0	0	0	0	0	0	0	0	0	0	0	33.33	0	0
184500	433.3	1167	4234	3734	3167	100	8571	100	833.4	2134	0	0	0	0	0	0	0	0	0	0	0	0	33.33	0	0	0	0	0	0	0	66.67	0
182600	100	833.4	4368	2900	3601	100	7737	66.67	833.4	2434	0	33.33	0	0	0	0	0	0	0	33.33	0	0	33.33	0	66.67	0	0	0	0	0	0	0
LA-map-VEMA-8 29/12/2016 12:51:15 (Run: 1)
191400	133.3	1467	4268	3167	3701	66.67	8237	100	833.4	2400	0	0	0	0	0	0	0	0	0	0	0	0	0	0	0	0	0	0	0	0	0	0
190400	66.67	1533	3534	3101	2634	33.33	7336	33.33	900	2900	0	0	0	0	0	0	0	0	0	0	0	0	0	0	0	0	0	0	0	66.67	0	0
182400	33.33	1667	4034	3000	3167	66.67	8137	33.33	1067	1967	0	0	0	0	33.33	0	0	0	0	0	0	0	0	0	0	0	0	0	0	0	0	0
192000	366.7	1567	4501	3367	3000	100	8270	0	600	1967	0	0	0	0	0	0	0	0	0	0	0	0	0	0	33.33	0	0	0	0	33.33	33.33	33.33
189400	166.7	1834	4201	2634	3167	33.33	7637	100	800	1967	0	0	0	0	0	33.33	0	0	33.33	0	0	0	0	0	0	0	0	0	0	66.67	0	0
180600	200	1333	3801	3101	2834	33.33	7536	166.7	866.7	2467	0	0	0	0	0	0	0	0	0	0	0	0	33.33	0	0	0	0	0	0	33.33	0	0
188200	0	1167	4468	3134	2834	0	8571	133.3	900	2567	66.67	0	0	0	0	0	0	0	0	0	0	0	0	0	0	0	0	0	0	33.33	0	33.33
186400	66.67	966.7	3401	2934	3000	66.67	7770	100	1000	2767	0	0	0	0	0	0	0	0	0	0	0	0	0	0	0	0	0	0	0	33.33	0	33.33
190100	66.67	1500	3734	2334	2967	33.33	8104	0	1100	2034	0	0	0	0	0	0	0	0	0	0	0	0	33.33	0	0	0	0	0	0	0	0	0
189900	33.33	1000	4368	3267	2934	33.33	7937	133.3	1000	2134	0	0	0	0	0	0	0	0	0	0	0	0	0	0	0	0	0	0	0	33.33	0	0
185100	166.7	866.7	4068	2834	3601	33.33	8270	200	1400	2200	33.33	0	0	0	0	66.67	0	0	0	0	0	0	0	0	33.33	0	0	0	0	0	0	0
187500	166.7	1100	4701	3234	2934	66.67	8471	66.67	800	2367	0	0	0	33.33	33.33	0	0	0	0	0	0	0	0	33.33	33.33	0	0	0	0	0	0	0
182200	66.67	900	3601	3000	2667	0	8537	33.33	1133	2234	0	0	0	0	0	0	0	0	0	0	0	0	0	0	0	0	0	0	0	66.67	0	0
186700	166.7	1267	3968	4101	2600	33.33	7970	66.67	866.7	1934	33.33	0	0	0	0	0	0	0	0	0	33.33	0	0	0	0	0	0	0	0	100	0	33.33
178700	100	1067	4534	3667	3201	33.33	8037	100	933.4	2400	0	0	0	0	0	0	0	0	0	0	0	0	0	0	0	0	0	0	0	66.67	0	0
193400	33.33	1067	4601	2934	3367	33.33	7503	66.67	900	2334	0	0	0	0	33.33	0	0	0	0	0	0	0	0	0	33.33	0	33.33	0	0	0	0	0
191200	100	1100	3801	2634	2667	33.33	6769	166.7	833.4	1834	0	0	0	0	0	0	0	0	0	0	0	0	0	0	0	0	33.33	0	0	0	0	0
180600	33.33	1400	3601	2800	2834	133.3	8771	133.3	700	2067	33.33	0	0	0	0	0	0	0	0	0	0	0	0	0	0	0	0	0	0	0	0	0
181500	33.33	1333	3867	2934	2934	33.33	7937	66.67	866.7	2300	33.33	0	0	33.33	0	0	0	0	0	0	0	0	33.33	0	0	0	0	0	33.33	0	0	0
185300	100	1200	3701	2900	3067	66.67	7737	33.33	900	2567	0	0	0	0	0	0	0	0	0	0	0	0	0	0	0	0	0	0	0	66.67	0	0
187000	133.3	1400	4334	3000	2767	33.33	8371	166.7	966.7	2334	0	0	0	0	0	0	0	0	0	0	0	33.33	0	0	0	0	0	0	0	33.33	0	0
188600	200	1167	4768	3701	3167	33.33	7903	33.33	900	2200	33.33	0	0	0	0	0	0	0	0	0	0	0	0	0	66.67	0	33.33	0	0	33.33	33.33	0
189900	133.3	1267	4701	3134	2834	133.3	7403	33.33	933.4	3000	0	0	0	0	0	0	0	0	0	0	0	0	0	0	0	0	0	0	0	66.67	0	0
182500	133.3	1200	4935	3434	3201	100	7503	133.3	766.7	2100	0	0	0	0	0	0	0	0	0	0	0	0	0	0	0	0	0	0	0	33.33	0	33.33
193400	11140	16620	5402	3434	4034	1867	62580	66.67	1100	2234	500	933.4	33.33	200	233.3	66.67	100	0	33.33	33.33	0	33.33	66.67	33.33	66.67	0	0	0	0	33.33	0	0
225400	48030	98800	12110	2867	8504	6836	317800	100	900	2300	1767	1700	66.67	166.7	433.3	166.7	166.7	33.33	33.33	0	33.33	33.33	33.33	0	33.33	0	33.33	33.33	0	33.33	0	0
235400	99950	141800	17020	3201	12940	18450	525000	500	1267	2000	5135	3334	0	500	1233	233.3	333.3	100	100	166.7	33.33	200	233.3	166.7	100	166.7	66.67	0	0	66.67	33.33	0
368600	206000	436400	44440	3767	27940	35840	1278000	1100	900	2134	10870	7803	333.3	700	2067	566.7	600	66.67	66.67	300	233.3	566.7	166.7	266.7	233.3	333.3	166.7	166.7	0	266.7	33.33	0
692600	609600	1129000	78340	3101	67520	88020	3029000	2300	1167	2300	23430	17350	433.3	1300	5201	1333	800	333.3	500	200	533.3	1033	1000	733.4	166.7	333.3	233.3	266.7	0	233.3	133.3	0
921800	1009000	1773000	127400	3834	118100	130300	4991000	2367	1333	2500	35300	25170	400	1967	6736	1333	966.7	400	566.7	700	966.7	866.7	866.7	1000	200	500	500	466.7	100	133.3	66.67	66.67
1158000	1209000	2339000	136800	3101	132300	161200	5528000	3934	1300	2434	42400	26400	433.3	2667	7737	2067	1400	400	700	500	800	1233	1067	800	433.3	466.7	533.3	700	66.67	133.3	133.3	66.67
1216000	1327000	2314000	171100	3267	152400	171900	6649000	4268	966.7	2834	49300	30450	900	2967	8604	2067	2167	633.4	466.7	1033	966.7	1667	1233	933.4	300	733.4	566.7	533.3	66.67	333.3	66.67	133.3
1365000	1474000	2670000	167800	3401	169900	200000	8680000	4835	966.7	2900	57620	38010	666.7	3934	9638	2400	2200	666.7	500	633.4	866.7	1567	1433	1300	766.7	766.7	466.7	633.4	66.67	333.3	33.33	33.33
1516000	1525000	2736000	194900	3968	179900	210100	8392000	4735	1467	2867	61140	38510	766.7	2800	12740	2534	1834	900	766.7	1067	1133	1700	1300	1200	566.7	766.7	833.4	666.7	100	333.3	33.33	66.67
1380000	1532000	2716000	189000	3534	167600	217700	8386000	4568	1467	2834	53930	37780	733.4	3134	10070	2667	1967	500	500	966.7	1100	1300	1267	1433	366.7	1000	500	666.7	100	233.3	33.33	33.33
1428000	1591000	2662000	180100	3534	169600	226700	8927000	4268	1400	2500	62980	35940	666.7	2934	9505	2167	2334	566.7	533.3	1167	900	1500	1500	1267	433.3	666.7	500	933.4	66.67	333.3	66.67	66.67
1591000	1631000	2954000	201000	4301	182600	206900	9880000	4801	1167	3334	77260	35970	800	3201	8404	1900	1800	600	700	400	933.4	1533	1633	1133	566.7	900	333.3	833.4	100	100	100	100
1542000	1656000	3138000	197700	3867	196100	178300	9567000	4368	833.4	2667	74070	32120	566.7	2634	8471	1733	1800	333.3	566.7	633.4	666.7	1133	1267	800	400	766.7	266.7	766.7	133.3	133.3	33.33	66.67
1454000	1415000	3507000	188800	4101	179600	163600	7795000	3334	1267	3167	76180	29080	600	2300	6636	1100	2067	466.7	733.4	433.3	800	1200	666.7	733.4	366.7	566.7	333.3	733.4	166.7	266.7	0	66.67
1502000	1276000	3731000	210000	3934	180100	153700	6786000	4601	1300	2834	68790	26370	433.3	1967	6803	1333	1200	500	500	433.3	666.7	1400	800	966.7	266.7	800	600	566.7	133.3	233.3	0	33.33
1652000	1245000	3655000	174200	3301	179700	168200	6804000	4101	933.4	3101	68260	28210	733.4	1900	7536	1800	1633	366.7	400	866.7	600	1533	966.7	1067	466.7	533.3	533.3	600	133.3	200	133.3	0
1508000	1241000	3522000	217400	4068	178600	182700	7278000	4935	933.4	2834	69630	28240	500	2267	8437	2034	2167	666.7	800	833.4	666.7	1467	1000	900	633.4	466.7	266.7	533.3	100	266.7	100	33.33
1378000	1348000	3457000	193600	3567	195400	194300	7268000	4401	1267	2434	67380	31760	733.4	2934	9438	1800	1767	733.4	533.3	633.4	1000	1267	700	1300	366.7	700	333.3	700	66.67	300	0	0
1639000	1278000	3737000	188300	4234	186600	193400	7455000	4534	1067	2167	68090	33290	600	2967	8704	1700	1533	400	733.4	966.7	533.3	1100	1167	966.7	400	666.7	700	866.7	100	133.3	66.67	100
1758000	1238000	3338000	181300	3101	174500	210100	7340000	4868	1267	3000	64290	37040	933.4	3467	9605	1267	1867	633.4	600	733.4	700	1067	1067	1033	400	800	333.3	833.4	100	266.7	33.33	33.33
1617000	1288000	3318000	186700	4301	186100	208900	7600000	4501	1500	3034	63250	37310	666.7	2867	10210	2400	1867	833.4	566.7	833.4	1033	1300	1567	1233	533.3	633.4	366.7	900	100	133.3	133.3	100
1487000	1237000	3167000	176600	4534	174600	198700	7741000	4568	1400	2767	63860	37810	400	2967	11810	2567	1900	933.4	600	900	866.7	1267	1000	1233	266.7	766.7	433.3	800	0	200	66.67	0
1540000	1244000	2992000	201000	4001	160200	224900	8591000	4768	833.4	3201	64490	40660	666.7	3734	11040	2100	2267	700	766.7	566.7	700	1767	1267	1000	433.3	833.4	633.4	733.4	100	233.3	66.67	33.33
1754000	1408000	3207000	194200	3034	189300	222300	9177000	5602	1633	3234	69570	41530	700	3701	11840	2367	2367	533.3	700	633.4	1100	1500	1433	1433	600	833.4	300	933.4	166.7	100	100	33.33
1695000	1484000	3219000	203100	3367	175100	228000	9961000	5702	1367	3934	69870	38380	1033	3767	10670	2334	2900	566.7	1000	566.7	833.4	1633	1200	1400	600	933.4	500	766.7	233.3	233.3	0	133.3
1548000	1514000	3006000	201400	4001	161600	267700	10330000	6436	1100	3767	67620	42260	1067	4134	12940	2134	2134	533.3	800	966.7	1033	1533	1033	1033	533.3	1000	500	1000	200	466.7	100	66.67
1482000	1358000	3106000	188400	3801	165300	264400	10590000	6336	1067	3834	67050	42160	933.4	3734	11840	2667	2367	833.4	766.7	1033	966.7	1533	1400	966.7	566.7	1000	500	1200	100	233.3	33.33	0
1518000	1351000	2961000	190700	3734	152600	254200	10720000	7069	1233	3401	67180	41460	833.4	4334	13110	2400	2334	600	766.7	900	700	1400	1300	900	666.7	733.4	466.7	533.3	100	366.7	100	0
1527000	1338000	3226000	208200	3101	158900	244900	9654000	6269	800	3567	69230	40260	933.4	3801	12240	2300	2200	766.7	300	766.7	866.7	1400	1167	1567	566.7	666.7	533.3	533.3	133.3	133.3	66.67	33.33
1570000	1355000	3360000	192600	3534	183900	211000	9203000	5635	1100	3334	66880	38480	733.4	3434	11170	2000	1967	566.7	800	700	1000	1467	1100	1233	566.7	900	366.7	666.7	266.7	300	100	66.67
1529000	1395000	3322000	182000	3101	178600	211000	8287000	4434	833.4	3267	62010	34200	1033	3034	10540	2500	1900	633.4	733.4	533.3	866.7	1567	1167	1367	566.7	966.7	500	800	100	133.3	133.3	0
1541000	1267000	3153000	191100	3501	165000	209400	7808000	4568	866.7	3267	61640	34030	666.7	2767	9638	2200	1600	333.3	766.7	800	800	1467	1067	966.7	466.7	700	400	733.4	233.3	33.33	66.67	33.33
1439000	1346000	3126000	193700	3067	169600	223900	8460000	4768	1000	1767	59760	31690	766.7	3067	8537	1934	1700	500	766.7	666.7	733.4	1533	1000	733.4	333.3	633.4	566.7	500	66.67	233.3	100	0
1461000	1356000	3128000	185700	3334	172200	213900	8256000	4101	1033	2967	63620	33730	600	2934	8304	2034	1667	366.7	666.7	600	766.7	1233	1333	1433	433.3	700	300	633.4	133.3	233.3	0	100
1466000	1505000	3178000	200700	3301	188000	218400	8257000	5068	1233	3034	62480	32790	433.3	2134	8904	1934	1600	533.3	533.3	600	1000	1300	900	966.7	400	933.4	700	933.4	100	233.3	0	33.33
1531000	1487000	3187000	188200	3634	181100	212900	8052000	4501	1033	2334	59360	30990	733.4	2034	7770	1900	1767	500	800	733.4	566.7	1267	900	1067	466.7	733.4	400	533.3	33.33	466.7	66.67	0
1448000	1471000	2897000	176400	3634	177000	212400	7221000	3567	1000	2500	59700	29920	1167	2667	7370	1600	1467	400	233.3	566.7	600	1400	1167	1200	333.3	566.7	300	633.4	33.33	100	100	0
1503000	1515000	3244000	194500	3667	175500	196900	7768000	3968	1067	2800	61070	28950	733.4	2667	8104	1700	1300	366.7	733.4	700	866.7	1700	833.4	966.7	366.7	566.7	300	633.4	66.67	333.3	66.67	133.3
1487000	1548000	3095000	197700	3267	176800	216500	7334000	3667	1033	2034	60800	28510	666.7	2134	6769	1700	1633	533.3	733.4	733.4	966.7	1300	700	1367	400	933.4	200	700	133.3	233.3	33.33	0
1462000	1517000	3109000	184300	4701	178000	195600	7249000	4168	933.4	2767	58220	26670	566.7	1433	7403	1367	1533	600	366.7	433.3	600	1267	1300	900	500	766.7	666.7	366.7	66.67	166.7	33.33	33.33
1409000	1453000	2887000	179300	3867	167000	188600	7292000	3267	1300	3401	54430	29980	466.7	1834	6769	1333	1467	566.7	766.7	433.3	833.4	1267	1100	1100	366.7	466.7	500	700	100	166.7	33.33	0
1361000	1495000	2953000	171800	3701	167200	194300	6921000	3601	1033	2867	60900	28540	700	2034	6102	1834	966.7	533.3	633.4	900	1067	1433	1533	966.7	366.7	500	400	800	100	100	66.67	33.33
1312000	1457000	2788000	183900	3501	161700	206700	7142000	3634	766.7	3000	56610	28510	833.4	1934	6469	1533	1733	433.3	733.4	366.7	766.7	1267	900	1133	700	933.4	533.3	566.7	166.7	266.7	0	0
1400000	1494000	2958000	179300	3067	177400	214500	7373000	4334	933.4	2400	54630	31020	666.7	2667	7203	1767	1400	466.7	633.4	966.7	1167	1033	900	700	400	933.4	433.3	1167	200	133.3	66.67	0
1424000	1568000	3168000	196200	3401	166600	205900	7203000	3767	1167	2500	56010	32190	866.7	2000	7436	1733	1333	333.3	900	833.4	733.4	1400	1133	1433	500	700	566.7	733.4	100	100	33.33	0
1522000	1559000	3116000	182700	3601	181900	212200	7785000	4334	1033	2434	58760	33090	566.7	2667	9905	2167	1567	666.7	866.7	866.7	433.3	1567	1400	1167	433.3	800	333.3	366.7	66.67	200	0	33.33
1505000	1435000	2682000	171400	3401	169000	214400	7556000	5602	1133	2834	56710	40360	733.4	3867	11740	2134	2067	533.3	700	933.4	1100	2067	1700	1067	466.7	1200	600	1133	200	466.7	166.7	66.67
1542000	1348000	2869000	190900	3467	158300	273500	8853000	5635	1267	2600	57150	52250	600	5235	14850	2934	2667	966.7	1133	1333	966.7	1700	1167	1433	666.7	733.4	566.7	1200	233.3	166.7	66.67	33.33
1417000	1198000	2860000	182500	4168	144000	298200	9565000	7670	1400	2867	51810	58420	1533	5602	17480	2934	3401	933.4	1267	1067	1200	2434	1900	1700	633.4	1000	433.3	966.7	400	333.3	100	100
1538000	1079000	2590000	174800	3834	142100	281100	9785000	6769	1300	2667	57510	57450	966.7	6202	17620	3667	3034	1067	666.7	1133	1100	2334	1300	1067	766.7	1067	666.7	1200	66.67	466.7	200	66.67
1533000	1096000	2940000	186500	3734	137800	299600	14020000	6969	1200	2900	58660	56070	1133	5001	16250	3901	2800	733.4	1000	1400	1133	2434	1834	1567	800	900	466.7	800	133.3	266.7	100	0
1671000	977000	2917000	173700	3267	138600	254800	9154000	5969	1033	3601	53390	45510	900	5335	16180	2934	2567	500	1200	1000	900	1667	1433	1300	633.4	833.4	466.7	700	66.67	400	100	66.67
1553000	1094000	3163000	191600	3567	165700	247500	8893000	6602	1267	3701	62010	43770	900	4134	14380	3201	2834	966.7	700	766.7	1033	1733	1700	1333	600	766.7	600	800	233.3	533.3	133.3	0
1635000	1156000	3079000	202300	3234	161400	247600	8683000	6135	1067	2900	59860	42970	1000	3968	14340	2167	2667	733.4	700	1333	1367	1600	1167	1500	666.7	733.4	100	733.4	100	333.3	100	133.3
1700000	1310000	3255000	174500	3634	157700	242200	8795000	5335	1200	4434	58020	44310	866.7	3968	12840	2734	2334	933.4	966.7	1100	733.4	1200	1633	1367	500	733.4	733.4	866.7	200	300	66.67	66.67
1448000	1302000	3145000	189500	3801	160600	241700	9606000	6402	1300	3234	57450	41230	700	3534	11970	2367	2634	566.7	633.4	866.7	1200	1533	1467	1267	500	900	533.3	600	200	166.7	100	0
1710000	1367000	3101000	194000	3234	166200	229500	8939000	6069	1133	3801	60630	42130	700	3634	11540	1767	2000	633.4	700	1100	966.7	1533	1667	1100	433.3	633.4	566.7	833.4	66.67	233.3	66.67	33.33
1526000	1479000	3013000	192600	3534	172800	230700	8678000	4635	1100	3367	61470	37580	666.7	3367	10540	2134	1467	633.4	833.4	800	700	1767	1333	1567	500	833.4	433.3	600	133.3	266.7	100	33.33
1529000	1538000	3171000	200800	3201	175300	240900	8933000	5602	1800	3201	64630	39550	766.7	3634	10840	1967	2700	866.7	1033	1033	1067	1767	1333	1033	466.7	900	533.3	833.4	266.7	166.7	33.33	33.33
1828000	1455000	3335000	191800	3734	183600	236400	8609000	4201	1100	2900	65430	36610	700	3467	9672	1800	2500	466.7	966.7	733.4	1033	1600	1367	1233	600	900	566.7	1067	166.7	300	200	33.33
1682000	1736000	3585000	200900	3567	204200	259300	9109000	5668	1667	2567	64860	39990	900	3267	11970	2567	2267	633.4	800	1000	1000	1500	1733	1500	666.7	600	366.7	700	166.7	300	166.7	33.33
1560000	1716000	3620000	204200	3767	185100	267600	9002000	4801	900	2400	67520	42030	733.4	3101	11440	2534	2767	900	933.4	766.7	1400	1967	1367	1200	566.7	566.7	700	966.7	33.33	300	0	33.33
1770000	1806000	3347000	219700	3867	208600	264100	9677000	6135	1033	3801	67050	41430	700	3634	12140	2500	1834	566.7	900	633.4	1133	1533	1633	1500	366.7	700	566.7	733.4	100	300	33.33	33.33
1716000	1802000	3371000	213100	3501	189300	253700	9079000	4134	1367	2900	62610	39420	800	2967	11240	2534	1800	600	1167	1100	1100	1700	1300	1433	700	700	800	633.4	233.3	166.7	100	66.67
1662000	1777000	3216000	213700	3367	199700	244000	9298000	4801	1300	3167	67650	38920	700	4068	11140	2367	1533	700	866.7	833.4	666.7	1867	1233	1400	333.3	600	566.7	1033	33.33	200	266.7	33.33
1718000	1811000	3598000	214200	4134	203500	259700	9079000	4334	933.4	2734	72020	41930	1233	3534	10010	1934	1967	800	700	1033	666.7	1667	1300	1333	633.4	833.4	600	933.4	100	200	33.33	66.67
1618000	1808000	3918000	240100	3134	225800	239000	7958000	4034	1167	2900	72990	37510	566.7	2734	9939	2667	1633	366.7	566.7	566.7	600	1500	1033	1067	333.3	533.3	200	800	100	266.7	100	100
1665000	1452000	4609000	253200	3734	229800	181000	6702000	3801	1033	2700	79180	28140	533.3	1567	7370	2134	866.7	466.7	200	666.7	566.7	1000	933.4	733.4	533.3	566.7	466.7	533.3	0	233.3	133.3	0
1746000	1100000	5788000	236200	3701	234300	141200	5207000	2834	1033	2834	93610	23500	300	1233	5668	1033	1300	366.7	533.3	433.3	366.7	1033	766.7	600	133.3	333.3	233.3	466.7	66.67	200	66.67	0
1688000	855700	5684000	218900	3834	219700	104000	3910000	2534	1400	2767	99340	15110	466.7	1300	3701	1100	700	133.3	500	366.7	433.3	800	400	300	166.7	300	300	333.3	66.67	66.67	0	0
1650000	647500	5553000	197500	3567	207500	71140	3026000	1100	1200	3301	79750	12640	500	1033	3101	700	333.3	133.3	166.7	200	400	366.7	300	400	100	200	133.3	233.3	33.33	133.3	33.33	0
1482000	473400	4759000	164900	3201	183700	57410	2358000	1133	1000	2767	81600	8604	400	766.7	2400	433.3	566.7	200	166.7	133.3	133.3	566.7	333.3	333.3	166.7	200	0	200	33.33	33.33	66.67	0
1276000	414900	4571000	175000	3634	159400	41360	1714000	1333	966.7	2667	76180	6969	266.7	833.4	2000	333.3	266.7	133.3	366.7	133.3	66.67	133.3	333.3	233.3	66.67	166.7	33.33	66.67	0	0	0	33.33
1466000	345900	4907000	163100	3567	176800	45080	1918000	1400	900	2800	81300	8371	233.3	666.7	2000	600	500	266.7	300	66.67	300	433.3	200	66.67	100	200	266.7	133.3	33.33	66.67	33.33	33.33
1373000	456700	4505000	148900	3334	166200	71720	2592000	1233	1067	3401	66370	11710	200	900	2567	666.7	666.7	66.67	266.7	133.3	166.7	433.3	333.3	333.3	200	200	66.67	166.7	66.67	66.67	33.33	0
1190000	428800	3537000	152300	3367	137200	62510	2316000	1333	933.4	2300	59490	8904	266.7	800	2067	466.7	466.7	33.33	100	233.3	166.7	300	433.3	300	200	166.7	200	133.3	0	200	33.33	0
1294000	439600	4286000	146200	3767	176600	58760	2264000	1133	1433	2534	67180	9205	100	1100	2067	800	633.4	133.3	133.3	100	266.7	333.3	366.7	133.3	100	133.3	166.7	33.33	33.33	133.3	33.33	33.33
1565000	445100	5547000	187800	3501	191100	62380	2415000	1333	1033	2567	94020	8204	466.7	766.7	2767	466.7	333.3	66.67	100	166.7	200	400	233.3	200	200	66.67	100	100	0	100	0	33.33
1849000	352200	6123000	210500	3267	207000	50070	1990000	1333	900	2534	92330	7570	333.3	866.7	3000	466.7	466.7	133.3	266.7	233.3	233.3	266.7	366.7	300	100	166.7	133.3	233.3	0	66.67	33.33	0
1704000	379800	5621000	177700	3567	190300	59190	2168000	1667	933.4	2800	88230	9705	333.3	1533	3767	866.7	866.7	200	300	366.7	66.67	666.7	400	666.7	200	233.3	133.3	133.3	133.3	133.3	33.33	0
1673000	470300	4622000	167800	4101	167300	69630	2872000	1567	1367	2700	74710	11170	200	1200	3367	700	466.7	200	366.7	166.7	466.7	466.7	600	200	100	200	166.7	266.7	0	66.67	33.33	100
1399000	508400	4495000	173100	3134	155300	70540	2966000	1533	1367	2634	75510	14180	333.3	1700	4201	1000	933.4	200	1967	200	133.3	966.7	333.3	566.7	466.7	266.7	200	466.7	33.33	333.3	0	0
1562000	686900	4050000	179500	3467	167800	94560	4017000	2034	1300	3667	68960	20620	300	1767	6369	1133	1500	233.3	433.3	366.7	300	900	800	700	200	366.7	333.3	700	66.67	233.3	0	0
1868000	662400	3385000	163400	3067	134200	108700	4639000	3567	1167	2534	58720	27110	400	2534	8704	1467	1867	433.3	533.3	633.4	533.3	1133	700	766.7	333.3	266.7	266.7	533.3	100	233.3	33.33	66.67
1433000	895900	3497000	164300	3534	163000	164200	6323000	4068	1300	2867	59430	34830	400	3401	10740	2000	1900	866.7	833.4	733.4	766.7	1300	1167	1167	700	566.7	400	933.4	66.67	466.7	66.67	0
1510000	1226000	3644000	182400	3067	186600	199900	8099000	5869	1200	3801	67720	41860	1000	4334	14440	3067	2200	666.7	666.7	933.4	1400	1100	1300	1300	533.3	800	566.7	1100	100	366.7	66.67	100
1611000	1446000	3556000	211000	3968	195100	235900	8788000	5802	1267	3968	66640	47860	633.4	4635	13680	3701	2600	666.7	966.7	866.7	900	1667	1767	1133	700	733.4	700	833.4	100	266.7	100	33.33
1712000	1762000	3474000	211700	4134	201300	220900	8485000	5935	1133	3701	63860	40490	733.4	4234	12410	3134	2400	566.7	1067	800	1167	1934	1300	1834	566.7	866.7	700	966.7	100	266.7	166.7	33.33
1439000	2483000	3343000	236200	3367	257600	238700	8500000	4201	866.7	3734	57680	33090	633.4	3267	9905	1800	1867	400	633.4	733.4	1067	2034	1567	1300	566.7	866.7	500	533.3	100	100	100	33.33
1386000	2411000	2917000	212700	4134	257000	185500	7609000	4401	1667	3234	47620	30480	533.3	2767	8004	2000	1867	533.3	600	533.3	866.7	1433	733.4	1233	433.3	766.7	500	733.4	33.33	200	0	0
1084000	2612000	2499000	202800	3667	262300	187800	7161000	2634	1100	2700	38510	23900	533.3	2134	6702	1400	1333	500	466.7	1033	833.4	1133	1333	966.7	666.7	666.7	333.3	966.7	66.67	133.3	33.33	66.67
991100	3517000	2076000	225800	5001	285800	190400	7575000	3701	1233	2734	33230	24070	300	1500	5435	1500	1267	766.7	733.4	733.4	1167	1100	1200	700	366.7	600	400	666.7	33.33	66.67	33.33	33.33
892100	4093000	2123000	238900	3000	296700	193800	8138000	3968	1400	2967	32930	25130	433.3	1633	6469	1300	1700	833.4	766.7	566.7	800	1667	1233	1200	500	800	566.7	566.7	66.67	133.3	0	0
1024000	3685000	2576000	262000	3601	310100	231000	9331000	3767	1533	3234	45780	33290	566.7	3034	8637	2334	1533	733.4	866.7	1200	900	1767	1834	1467	966.7	733.4	733.4	866.7	33.33	300	100	33.33
1344000	3337000	2823000	238700	3901	291500	228200	8804000	4334	1333	2734	50840	33360	300	2367	8704	1733	2100	766.7	533.3	600	1067	1767	666.7	1300	566.7	666.7	566.7	833.4	133.3	133.3	166.7	0
1313000	2856000	2995000	215900	4568	239800	250400	8801000	4701	966.7	3000	56810	35670	433.3	2467	8304	2267	1500	633.4	733.4	866.7	1500	1567	1233	1767	500	733.4	500	633.4	33.33	166.7	100	0
1428000	2645000	3238000	232800	3834	243600	235100	9615000	5402	1200	2834	56470	40260	866.7	2867	10940	2267	2067	566.7	1033	733.4	800	1733	1500	1533	933.4	866.7	733.4	1200	100	233.3	200	33.33
2245000	2555000	3513000	239100	4401	224700	262300	9328000	4868	1300	3234	65900	38850	1000	3434	10070	2000	1700	633.4	900	1000	1033	1533	1500	1000	866.7	666.7	400	800	100	266.7	100	33.33
1592000	2175000	3254000	211900	3367	207900	234700	8636000	4901	1633	3167	58320	34630	500	3134	9438	1600	2067	733.4	800	733.4	900	1367	1200	1600	566.7	1067	366.7	700	100	166.7	133.3	66.67
1412000	2010000	3170000	202500	4501	192500	218100	8372000	4701	1133	3701	60470	35840	733.4	2600	8871	2034	2334	500	1300	700	1133	2034	966.7	1433	700	466.7	666.7	800	100	200	33.33	0
1740000	1842000	3151000	213200	3467	201000	212900	9425000	4635	1333	3034	60740	36410	700	3101	9505	1967	2167	866.7	800	766.7	1033	1467	1633	1333	666.7	733.4	400	833.4	66.67	233.3	100	33.33
1437000	1946000	3064000	218300	3801	196500	203600	8309000	4468	1033	2934	56340	34200	533.3	3134	9739	2067	2267	633.4	833.4	833.4	1133	1900	966.7	1533	800	900	333.3	500	200	200	133.3	33.33
1471000	1668000	3186000	210400	3534	185500	242000	9451000	5935	966.7	3134	62720	36370	700	3000	11010	2167	2134	633.4	900	933.4	800	1767	1233	1533	400	966.7	766.7	833.4	333.3	200	33.33	66.67
2131000	1948000	3467000	240600	3701	211700	285900	11150000	6169	833.4	3034	68320	43000	766.7	4234	12780	2700	2400	966.7	1133	900	733.4	1333	1433	1433	800	733.4	733.4	1267	100	333.3	166.7	33.33
1540000	1739000	3014000	219500	3467	182000	293000	11260000	6536	1300	3101	59060	42130	733.4	3567	12840	2167	2467	533.3	866.7	1533	1433	1433	1500	1367	633.4	1400	466.7	1367	66.67	133.3	100	33.33
1834000	1434000	2718000	204800	3801	166500	263600	10490000	5735	1233	2634	51980	49230	1067	4735	14040	3034	2667	1100	900	1033	1033	2034	1400	1567	600	666.7	633.4	1000	300	266.7	100	133.3
1840000	1526000	3147000	249600	3701	179000	349800	11760000	8004	1133	4268	77290	72720	1000	6903	23030	4334	4234	1067	1433	1133	2067	3334	2334	1967	900	1533	1233	1633	300	633.4	200	66.67
3215000	3315000	5529000	394700	4935	311200	515100	19650000	12740	1367	6702	108100	86340	2000	8104	26610	5635	4234	1200	1233	1600	1767	2934	1467	2500	1000	1533	933.4	1367	533.3	500	166.7	166.7
2368000	3573000	4250000	333200	4068	210100	333200	15720000	8738	1200	6736	85700	73760	1200	5268	16410	3667	3301	1200	900	1000	1067	1834	1333	1367	666.7	866.7	266.7	1233	266.7	466.7	166.7	33.33
1681000	2140000	3140000	207700	4234	182200	221100	9655000	4534	1267	4801	49940	46750	433.3	3067	10640	1800	2067	400	600	700	933.4	1200	1133	733.4	333.3	733.4	533.3	433.3	266.7	266.7	133.3	100
1118000	1084000	1769000	151400	3534	105300	144200	6501000	3067	1367	4101	33430	33830	666.7	2067	7169	1533	1433	533.3	700	800	900	1000	933.4	433.3	533.3	400	733.4	1067	200	66.67	33.33	33.33
1111000	1101000	1917000	158600	3701	109100	143000	7211000	2834	1133	4768	36340	43400	266.7	2900	7770	1267	1133	633.4	566.7	800	666.7	1067	1300	800	600	600	733.4	866.7	33.33	266.7	33.33	133.3
1404000	1291000	2301000	185600	4534	128900	151000	7770000	3467	1567	5735	48530	49670	900	2567	7403	1433	1500	400	666.7	733.4	633.4	1467	766.7	1000	400	800	266.7	733.4	66.67	300	66.67	100
1398000	1259000	2431000	180600	3734	127200	180800	8460000	3734	966.7	5335	45310	59260	833.4	3834	13840	3634	2367	833.4	533.3	1067	1000	1533	1467	1733	966.7	900	733.4	1633	366.7	400	100	33.33
2018000	1528000	3345000	266700	4201	173000	290800	12790000	8904	1367	5869	66610	72590	1000	5302	19350	4568	3401	766.7	1067	1433	1067	2267	2200	2000	600	1267	766.7	1733	300	333.3	166.7	33.33
2743000	1806000	4004000	267100	4301	201200	366500	14890000	8037	933.4	6002	84590	80820	1667	6769	23000	4501	3767	933.4	1867	1567	1733	2167	2067	2034	1167	1167	966.7	1667	133.3	566.7	66.67	100
2917000	1842000	3979000	301100	3968	185000	392500	14900000	10070	1333	5435	76350	77130	1133	7403	20020	4068	5168	1133	1500	1100	1633	2734	2000	2334	700	1400	666.7	1467	266.7	300	200	33.33
2353000	1730000	3734000	274900	3601	186300	409000	15200000	10010	1367	5302	69030	69700	1267	6102	20960	4468	3367	1133	1467	1367	1200	2434	1867	1867	966.7	1233	866.7	1733	300	366.7	300	166.7
2333000	1988000	3875000	276300	4801	215500	429400	16030000	10640	900	5001	84050	69360	966.7	6502	20290	4001	4368	866.7	1733	1467	1700	2300	1767	2434	633.4	1233	566.7	1133	366.7	466.7	166.7	133.3
2589000	2318000	4295000	288600	2934	242500	415200	15130000	8371	1200	4434	90140	60330	1000	6002	19050	3567	3434	966.7	666.7	1300	1300	2234	2234	1733	666.7	1133	800	1400	100	433.3	133.3	100
2171000	2253000	4216000	273500	4401	238400	354000	14140000	7937	733.4	4668	73290	53220	766.7	4801	13610	2867	2667	833.4	1067	766.7	933.4	2334	1767	1533	733.4	866.7	633.4	766.7	200	233.3	66.67	33.33
2024000	1925000	3736000	241100	4101	225300	331700	12230000	7103	1067	3534	71010	50570	800	4034	12840	3000	2300	800	900	733.4	1067	1800	1700	1400	733.4	933.4	733.4	900	100	400	100	0
2066000	2043000	4195000	233900	4068	222900	289700	10650000	6836	1100	3734	68730	42260	566.7	2734	10840	2500	2167	466.7	966.7	833.4	1367	2234	833.4	1033	633.4	566.7	500	633.4	66.67	266.7	100	66.67
1826000	1644000	3670000	226500	4001	187800	245600	9158000	4668	1233	3701	74810	37110	666.7	3201	10510	1834	2267	366.7	1133	766.7	600	1333	1367	1100	833.4	833.4	600	700	33.33	166.7	33.33	0
1809000	1673000	3438000	225500	4234	213000	260200	9910000	5101	1500	2967	72490	40860	833.4	3267	11270	2067	2467	533.3	900	733.4	1467	1333	1400	1433	666.7	1067	466.7	866.7	33.33	200	33.33	66.67
1695000	1695000	3739000	224800	3801	207700	253000	9378000	5435	1100	3567	68220	41230	633.4	3201	11940	2034	2034	766.7	800	766.7	800	1733	1533	1400	400	833.4	366.7	600	66.67	133.3	33.33	0
1608000	1780000	3526000	210400	3567	204800	252000	9467000	4635	1233	2667	71950	36870	600	2800	8838	2500	1834	600	833.4	633.4	1033	1167	1300	1433	533.3	866.7	500	833.4	33.33	100	66.67	33.33
1594000	1771000	3589000	215900	3901	221100	254400	9386000	5135	1400	3167	67890	39280	633.4	2700	8671	2000	1733	700	833.4	833.4	766.7	1533	1367	1533	633.4	866.7	233.3	833.4	100	300	133.3	0
1708000	1725000	3597000	203300	3501	196700	245500	8904000	5835	1567	3401	68590	35970	566.7	3401	10810	1767	2100	666.7	833.4	1133	733.4	1700	1133	1267	733.4	866.7	600	566.7	166.7	233.3	0	33.33
1686000	1574000	3446000	215000	4434	197400	242000	9921000	5201	1133	2934	67250	42570	866.7	3201	12980	2167	1967	800	933.4	966.7	633.4	1500	1333	1767	700	600	433.3	666.7	66.67	500	66.67	33.33
1841000	1497000	3042000	220500	3801	178500	247700	9263000	4368	1000	3101	66370	38850	733.4	3301	11270	2334	2300	600	866.7	1033	1333	1834	1300	1533	500	1000	833.4	900	266.7	200	133.3	100
1760000	1709000	3425000	230100	3701	206300	264800	9857000	4534	1267	3267	74770	41700	1133	4534	13040	2000	2367	633.4	933.4	1000	1000	2100	1467	1233	633.4	700	766.7	1100	166.7	433.3	100	33.33
1700000	1830000	3457000	204000	4468	202800	237700	8426000	4534	1133	2867	62180	35270	633.4	3000	10740	1733	2000	433.3	700	966.7	933.4	1467	1333	1033	566.7	600	533.3	866.7	233.3	200	66.67	33.33
1594000	1774000	3227000	222100	3801	200500	239600	8384000	4668	1133	2800	70100	37780	900	2767	11170	1800	2034	666.7	600	1200	966.7	1633	966.7	1267	566.7	600	266.7	500	66.67	200	0	66.67
1811000	1673000	3472000	208000	3434	195000	197100	7800000	2700	933.4	2934	69400	28780	766.7	2234	7403	1800	1733	300	500	766.7	633.4	766.7	666.7	800	333.3	500	366.7	600	66.67	133.3	66.67	33.33
1590000	1314000	4175000	214200	3334	186700	169900	6282000	3034	1133	3167	76550	23600	500	1834	7803	1133	1200	233.3	833.4	466.7	733.4	1100	1133	1067	366.7	666.7	266.7	500	66.67	66.67	33.33	33.33
1961000	1340000	4832000	215800	3401	218900	145500	5799000	3534	900	2534	83110	21090	500	1700	5468	1400	1267	233.3	500	300	366.7	800	700	600	366.7	466.7	300	733.4	0	300	0	66.67
1762000	1680000	4240000	207000	3767	186200	182200	7489000	3801	1333	3367	70100	33760	633.4	2700	8204	1767	1967	766.7	800	733.4	700	1500	1233	1233	533.3	566.7	500	733.4	133.3	200	133.3	33.33
1716000	1698000	3590000	206300	3734	172400	197800	8960000	5068	1000	3634	65970	32630	600	3201	10110	1967	1467	466.7	833.4	800	833.4	1100	1100	1333	500	633.4	766.7	1033	0	300	33.33	33.33
1667000	1522000	3257000	201100	4034	184700	216400	8727000	5335	1200	4234	67310	34600	666.7	4101	10970	2400	2034	700	900	966.7	966.7	1333	833.4	1067	433.3	733.4	533.3	800	133.3	166.7	66.67	66.67
1722000	1671000	3298000	196000	3968	192200	199300	8585000	3567	1067	4501	63620	33700	900	2800	9271	1200	1800	366.7	733.4	800	1000	1567	1233	1367	233.3	700	433.3	800	0	200	66.67	100
1793000	1519000	3383000	200900	3067	184800	195900	8958000	4368	1333	4401	65100	40820	800	3867	12680	2567	2034	566.7	600	900	1167	1934	1167	1200	600	1033	633.4	833.4	33.33	500	200	0
1652000	1533000	3260000	224300	4501	168800	238900	9733000	6336	1067	4001	63760	38480	966.7	4334	13180	2600	2134	633.4	800	900	866.7	1233	1367	1133	733.4	666.7	666.7	633.4	166.7	300	166.7	0
1411000	1304000	2660000	180000	3667	155200	211700	9705000	6002	1333	3834	53830	42530	866.7	3968	13140	2634	1867	400	900	700	666.7	933.4	1400	1167	433.3	1000	433.3	1033	200	366.7	200	0
1616000	1658000	3329000	213500	2967	188700	257200	10250000	5935	600	4268	66510	42630	966.7	3734	10440	2300	2167	800	966.7	900	866.7	1467	1333	766.7	300	700	633.4	800	266.7	133.3	66.67	0
1637000	1643000	3377000	215800	3968	199000	217500	8582000	5168	733.4	3034	62080	35940	933.4	2600	8604	1934	1900	500	833.4	933.4	800	1133	1267	1133	766.7	866.7	733.4	933.4	133.3	400	66.67	133.3
1595000	1577000	3045000	185200	3934	186300	206600	7403000	3934	1000	3567	60300	34630	766.7	2934	9105	2600	1600	666.7	1000	866.7	1033	966.7	1200	1000	633.4	466.7	500	666.7	0	266.7	166.7	33.33
1344000	1558000	2988000	187200	3901	172500	192700	7586000	3901	1400	3501	56310	32890	733.4	3034	9472	1500	1633	466.7	833.4	466.7	900	1233	1233	800	333.3	933.4	666.7	866.7	33.33	233.3	0	66.67
1448000	1708000	2950000	192000	3467	178100	190400	7337000	3934	1167	2500	57920	29510	700	2234	8637	1533	1667	366.7	633.4	700	700	1167	866.7	1200	566.7	500	500	633.4	200	500	33.33	33.33
1479000	1616000	3114000	172200	3767	187000	194500	7266000	4034	1333	3567	56210	34300	900	2567	9271	1533	2034	433.3	733.4	566.7	800	1433	1000	866.7	400	900	333.3	566.7	133.3	133.3	33.33	0
1410000	1559000	2964000	195200	3401	187000	211300	7997000	4434	1433	3834	63920	33700	500	3000	8004	1367	1633	400	600	866.7	900	1500	1167	1367	466.7	866.7	533.3	366.7	200	300	33.33	33.33
1570000	1886000	3265000	207400	3501	194200	231400	8131000	4368	1133	3567	64730	32520	533.3	2667	8804	1900	1834	566.7	633.4	700	1167	1367	1267	1000	500	766.7	633.4	833.4	100	200	0	166.7
1656000	1924000	3417000	233600	3834	194800	204800	7850000	3801	1267	3034	63220	32060	900	2600	7870	1600	1467	500	933.4	566.7	766.7	1500	1333	1067	433.3	766.7	433.3	566.7	33.33	266.7	166.7	33.33
1445000	1713000	3124000	195300	3567	179500	204400	7231000	3301	1333	2567	63620	30690	633.4	2367	7470	1667	1367	833.4	566.7	666.7	766.7	1300	966.7	1133	500	566.7	533.3	633.4	33.33	166.7	133.3	0
1496000	1782000	3132000	188100	4134	191700	211900	7286000	4034	1333	3334	64360	32160	566.7	2400	7470	1800	1633	700	866.7	900	1100	1567	1033	866.7	500	800	466.7	733.4	66.67	100	33.33	66.67
1448000	1841000	3261000	202800	3567	203200	209600	7735000	3434	1567	2467	65200	34200	400	2500	8037	1867	1800	400	533.3	633.4	533.3	1133	1367	900	533.3	666.7	433.3	933.4	33.33	100	133.3	66.67
1517000	1786000	3160000	206800	3601	200000	197000	7141000	2767	866.7	2500	66210	27240	566.7	2234	7169	1867	1500	566.7	600	733.4	400	1400	833.4	933.4	500	600	333.3	500	100	100	0	0
1105000	1389000	2677000	153800	3301	164400	142800	5928000	2467	1333	2867	58420	22960	766.7	1900	5435	1500	1067	433.3	733.4	766.7	400	800	866.7	966.7	300	466.7	200	400	133.3	100	66.67	33.33
1648000	1174000	4655000	198300	3367	212600	122000	4523000	1767	1400	3167	93440	16550	433.3	1500	4534	766.7	600	166.7	633.4	500	533.3	833.4	600	466.7	133.3	666.7	166.7	333.3	100	66.67	33.33	0
1511000	778700	4955000	185800	3667	184600	89470	3915000	1800	1233	2634	82670	12910	333.3	700	3434	733.4	700	300	500	200	533.3	600	466.7	400	266.7	366.7	200	300	33.33	133.3	33.33	33.33
1646000	808100	5511000	213900	4201	215700	99340	3843000	1533	1200	3501	94290	14210	700	1567	3434	633.4	666.7	266.7	466.7	66.67	300	533.3	500	500	133.3	366.7	133.3	466.7	33.33	33.33	0	33.33
1899000	777300	5489000	215600	3067	209200	80050	3471000	2000	1167	2700	91020	10170	200	900	3167	566.7	333.3	66.67	433.3	133.3	300	500	400	500	200	333.3	66.67	100	66.67	300	0	0
1676000	514200	5154000	178000	3701	193500	59230	2074000	1067	1000	2100	87860	8371	400	766.7	2267	466.7	600	66.67	133.3	166.7	100	466.7	400	366.7	100	266.7	100	66.67	0	66.67	0	0
1556000	409200	5387000	168300	4001	183500	41230	1842000	900	1233	2634	71680	6269	200	700	1567	233.3	366.7	166.7	233.3	266.7	100	233.3	233.3	200	33.33	100	33.33	66.67	33.33	33.33	0	0
1324000	316400	4034000	156700	3767	150900	31350	1363000	633.4	1367	2367	75750	3701	333.3	400	1167	233.3	266.7	66.67	66.67	66.67	100	33.33	133.3	33.33	100	66.67	33.33	0	0	33.33	0	0
1188000	239100	4031000	117300	3101	127500	28750	1014000	600	900	2967	44940	3267	333.3	300	733.4	233.3	100	0	33.33	33.33	0	133.3	166.7	66.67	66.67	33.33	0	33.33	0	0	0	0
526200	159500	1255000	50070	3134	52750	14980	557600	233.3	1200	2800	17450	2134	100	166.7	533.3	100	33.33	33.33	100	0	33.33	0	0	33.33	33.33	66.67	0	0	0	0	0	0
444900	110600	968300	34030	2867	32020	9972	682500	233.3	1133	2134	15480	1633	100	66.67	333.3	100	66.67	0	0	0	66.67	166.7	0	66.67	33.33	33.33	0	0	0	0	0	0
342000	78200	503600	25030	3367	23100	7203	297200	266.7	1133	2067	9371	866.7	33.33	100	166.7	33.33	66.67	0	66.67	33.33	0	33.33	33.33	33.33	0	33.33	0	0	0	0	0	0
331800	55700	376700	17150	3101	19350	4668	224700	66.67	1100	2434	6469	400	0	66.67	266.7	33.33	33.33	0	0	0	66.67	66.67	66.67	0	0	33.33	33.33	33.33	0	33.33	0	0
261400	33460	269100	15050	3767	13240	4001	174900	133.3	1200	2667	4635	433.3	66.67	33.33	66.67	33.33	0	0	33.33	0	33.33	0	0	33.33	0	0	0	0	33.33	0	0	0
241700	35670	223800	12910	3467	9905	2100	128500	66.67	1033	2034	2700	433.3	0	0	100	0	0	0	0	0	0	0	66.67	0	0	33.33	0	33.33	0	33.33	0	33.33
288500	19320	156000	9371	3234	8337	2300	87920	233.3	766.7	2800	2067	133.3	0	33.33	0	33.33	0	0	0	0	0	0	0	0	0	0	0	0	0	66.67	0	33.33
224500	16010	92940	7203	2967	6569	1767	62720	133.3	866.7	2867	1733	233.3	0	0	0	0	0	0	0	33.33	0	33.33	0	0	0	33.33	33.33	0	0	33.33	0	0
207500	13380	79650	7203	2934	4268	1233	58990	66.67	1033	2400	1200	66.67	33.33	66.67	33.33	0	66.67	0	33.33	0	0	0	0	0	0	0	0	33.33	0	0	0	0
200600	10510	53960	5735	2600	4835	700	49070	200	933.4	2834	700	100	0	33.33	33.33	0	33.33	0	0	33.33	33.33	33.33	33.33	0	0	0	0	0	0	33.33	0	0
206700	6502	29410	5502	3401	5502	633.4	35340	0	933.4	2067	433.3	100	66.67	33.33	100	0	0	0	0	0	0	0	0	0	0	0	0	0	0	33.33	0	33.33
195200	5902	35700	6035	3134	4134	400	35600	33.33	1533	2334	200	100	0	33.33	0	0	0	0	33.33	0	0	33.33	33.33	0	0	0	0	0	0	0	0	0
191000	4701	18390	5435	3534	4134	933.4	23700	66.67	1300	2067	200	0	0	0	0	0	0	0	0	0	0	0	0	33.33	33.33	0	0	0	0	33.33	0	0
190600	3000	20890	4668	3234	3567	366.7	19720	133.3	1000	2734	100	33.33	0	33.33	33.33	33.33	0	0	0	0	0	0	33.33	0	0	0	0	0	0	33.33	0	0
197300	3801	10410	4768	3467	3101	300	19390	33.33	833.4	2400	300	100	0	33.33	0	0	0	0	0	0	0	0	0	0	0	0	0	0	0	0	0	0
194000	2934	7970	4101	3301	3701	333.3	19620	33.33	1133	2467	233.3	33.33	0	0	0	0	0	0	0	0	0	0	0	0	0	0	0	0	0	66.67	33.33	0
186700	2634	6502	4368	3234	3467	266.7	13980	66.67	1167	2367	133.3	0	0	0	0	33.33	0	0	0	0	0	0	0	0	0	0	0	0	0	100	0	0
185100	666.7	6035	4334	2734	3801	266.7	15180	66.67	800	2267	166.7	66.67	0	0	33.33	33.33	0	0	0	0	33.33	0	0	0	0	0	0	0	0	33.33	0	0
188000	1400	8004	3901	2967	3134	233.3	14410	66.67	1233	1967	166.7	66.67	0	33.33	0	0	0	0	33.33	0	0	0	0	33.33	0	0	0	0	0	33.33	0	0
182400	1967	3667	4068	2867	2967	33.33	11440	100	1000	3234	33.33	0	0	0	0	0	0	0	66.67	0	0	0	0	0	0	0	0	0	0	0	0	0
181300	966.7	3901	4301	3167	3067	33.33	10210	66.67	900	2800	0	0	0	0	0	0	0	0	0	0	0	0	0	0	0	0	0	0	0	66.67	0	0
187300	100	2534	3467	3434	3134	133.3	11340	66.67	1133	2134	0	0	0	33.33	0	33.33	0	0	0	0	0	0	0	0	33.33	0	0	0	0	33.33	0	0
185300	966.7	4268	4635	3401	3334	100	8170	66.67	700	2234	33.33	33.33	0	33.33	0	0	33.33	0	0	0	0	0	0	0	0	0	0	0	0	0	0	0
182300	533.3	1000	4468	3601	3167	133.3	8604	33.33	866.7	2567	33.33	0	0	0	0	0	0	0	0	0	0	0	0	0	33.33	0	0	0	0	0	0	33.33
184600	833.4	1467	4434	3234	3000	33.33	9705	66.67	1167	2500	33.33	0	0	0	0	0	0	0	0	0	0	0	0	0	0	0	33.33	0	0	100	0	0
185300	266.7	2000	4501	3701	2600	233.3	10140	100	933.4	3034	33.33	33.33	0	0	33.33	0	0	0	0	0	0	0	0	0	0	0	0	0	0	0	0	0
182300	666.7	1367	4568	3034	3401	100	8637	133.3	1033	2000	0	0	0	33.33	0	0	0	0	0	0	0	0	0	0	0	0	33.33	0	0	0	0	0
189000	433.3	2334	4635	3934	3000	33.33	10770	100	1067	2467	0	0	0	33.33	0	33.33	0	0	0	33.33	0	0	0	0	33.33	0	0	0	0	66.67	0	0
186300	100	1133	4534	3734	3067	33.33	9338	33.33	1233	2600	0	0	0	0	66.67	0	0	0	0	0	0	0	0	33.33	0	0	0	0	0	33.33	0	0
187100	333.3	966.7	3934	3301	3134	0	9939	33.33	700	1600	33.33	0	0	0	0	0	0	0	0	0	0	0	0	0	0	0	0	0	0	66.67	0	0
190300	233.3	2167	4001	2967	2734	66.67	8637	33.33	966.7	2534	66.67	0	0	0	0	0	0	0	0	0	0	0	0	0	0	0	0	0	0	0	0	0
187500	133.3	1900	4168	3000	3134	33.33	8237	0	766.7	2234	0	0	0	0	0	0	0	0	0	0	33.33	0	0	0	0	0	0	0	0	33.33	0	0
191300	100	1067	4534	3467	2800	0	8604	100	1100	2434	0	33.33	0	0	0	0	0	0	0	0	0	0	33.33	0	0	0	0	0	0	33.33	0	0
190300	233.3	1200	4801	3134	3067	166.7	8270	33.33	700	2167	33.33	0	0	33.33	0	0	0	0	33.33	0	0	0	0	0	33.33	0	0	0	0	33.33	0	0
LA-map-VEMA-9 29/12/2016 12:55:17 (Run: 1)
191300	0	1767	4101	3801	3167	66.67	10810	33.33	900	2334	33.33	0	0	0	0	0	0	0	0	0	0	0	0	0	33.33	0	0	0	0	33.33	0	0
185900	66.67	1100	4301	3034	3034	66.67	9438	100	1333	2800	0	0	0	0	0	0	0	0	0	0	0	0	0	0	0	0	0	0	0	0	0	0
189500	1100	966.7	3867	3734	3467	33.33	8971	66.67	800	2500	0	0	0	0	0	0	0	0	0	0	33.33	0	33.33	0	0	0	33.33	0	0	33.33	0	33.33
188400	100	1267	4334	2900	2600	300	8804	100	766.7	2367	33.33	0	0	0	0	0	0	0	0	0	0	0	0	0	0	0	0	0	0	133.3	33.33	0
185400	33.33	900	3801	3267	2667	233.3	8838	66.67	1467	2800	0	0	0	0	0	0	0	0	0	0	0	0	0	0	0	0	0	0	0	0	0	0
183400	0	1367	3901	3067	3301	0	8671	66.67	1033	2667	33.33	0	0	0	0	0	0	0	0	0	0	0	0	0	0	0	0	0	0	0	0	0
184400	66.67	1133	4568	3467	3267	33.33	8537	66.67	1133	2634	0	0	0	66.67	0	0	0	0	0	0	33.33	0	33.33	0	0	0	0	0	0	133.3	0	0
188000	0	1033	3634	3634	3267	66.67	8204	100	966.7	2567	0	0	0	0	0	0	0	0	0	0	0	0	33.33	0	0	0	0	0	0	0	0	0
189000	0	1300	4901	2700	2467	33.33	8137	166.7	766.7	2300	0	0	0	0	33.33	0	0	0	33.33	0	0	0	0	0	0	0	0	0	0	0	33.33	0
185800	66.67	1300	4068	2934	2767	133.3	9805	100	966.7	2000	33.33	0	0	33.33	0	0	0	0	0	33.33	0	0	0	33.33	0	0	0	0	0	66.67	0	0
185300	66.67	1267	4168	3234	3367	0	7703	100	1033	2067	33.33	0	0	0	0	0	0	0	0	0	0	33.33	0	0	0	0	0	0	0	33.33	0	0
182800	33.33	1467	4735	3367	3301	66.67	8437	66.67	1200	2434	0	0	0	0	0	0	0	0	0	0	0	0	0	0	0	0	0	0	0	33.33	0	0
182200	100	1400	4601	3267	3334	133.3	8838	166.7	1200	3000	0	0	0	0	0	0	33.33	0	0	0	0	0	0	0	0	0	0	0	0	0	0	0
190700	100	1467	3567	2800	2700	66.67	9672	33.33	1133	3067	0	0	0	0	0	0	0	0	0	0	0	0	0	0	0	0	0	0	0	33.33	0	0
177600	166.7	1000	3968	3201	3367	66.67	7069	100	533.3	2367	0	0	0	0	0	0	0	0	0	0	0	0	0	0	0	0	33.33	0	0	0	0	0
187700	66.67	1767	4001	3701	3101	33.33	9071	66.67	900	2600	0	0	0	0	0	0	0	0	0	0	33.33	0	0	0	0	33.33	33.33	0	0	0	0	0
185300	133.3	833.4	4334	3301	3067	33.33	7336	0	800	2300	33.33	0	0	0	0	0	0	0	0	0	0	0	0	0	0	0	0	0	0	0	0	0
187900	66.67	1233	4001	3301	2800	100	8704	133.3	1133	2700	33.33	0	0	0	33.33	0	0	0	0	0	0	0	0	0	0	0	66.67	0	0	33.33	0	0
183000	66.67	1700	4001	3000	2367	0	7970	100	1067	2067	0	0	0	0	33.33	0	0	0	0	0	0	33.33	0	0	0	0	0	0	0	66.67	0	0
190700	66.67	1400	4668	3134	3301	33.33	8137	166.7	800	2234	0	0	0	66.67	0	33.33	0	0	33.33	0	0	0	0	0	33.33	0	0	0	0	0	0	0
185100	100	1100	4234	3067	2934	133.3	8504	133.3	1300	2900	33.33	0	0	0	0	0	0	0	0	0	0	0	0	0	0	0	0	0	0	33.33	0	33.33
187900	66.67	1300	4468	3301	3134	33.33	8437	66.67	833.4	2834	0	0	0	0	0	0	0	0	0	0	0	0	0	0	0	0	0	0	0	33.33	0	0
189600	33.33	933.4	4468	2734	2767	33.33	8471	33.33	766.7	2900	0	0	0	0	0	0	33.33	0	0	0	0	0	33.33	0	0	0	0	0	0	33.33	0	0
181500	33.33	1167	4034	2900	2967	100	8404	100	1233	2900	66.67	0	0	0	0	33.33	0	0	0	0	0	0	0	0	0	0	0	0	0	66.67	0	0
188300	833.4	21390	5101	3601	3401	433.3	36540	100	900	2334	66.67	100	0	0	33.33	0	0	0	0	33.33	33.33	0	0	33.33	0	33.33	33.33	0	0	0	0	0
207600	36540	73360	8404	3101	7069	5168	238100	200	800	2634	1567	1200	33.33	66.67	500	166.7	33.33	33.33	100	33.33	33.33	100	100	66.67	66.67	66.67	66.67	33.33	0	66.67	0	0
266800	95940	169500	15080	4068	13340	13980	604700	233.3	966.7	2467	4201	2500	0	400	833.4	100	133.3	33.33	33.33	33.33	33.33	133.3	66.67	100	66.67	100	100	0	0	33.33	33.33	0
337000	208300	345500	33190	3567	24830	30480	1366000	666.7	800	3434	9438	5568	133.3	633.4	1633	366.7	266.7	200	133.3	300	233.3	166.7	200	233.3	33.33	200	100	100	0	66.67	33.33	0
519800	442600	751600	68360	3134	52380	70040	2448000	1633	1200	2167	18850	12640	466.7	1300	3234	866.7	566.7	166.7	466.7	300	300	666.7	533.3	566.7	400	466.7	400	500	66.67	166.7	33.33	0
844600	762500	1539000	107500	3667	92300	131300	4731000	2667	1267	2667	31250	22800	533.3	2400	6969	1467	1233	666.7	300	700	433.3	966.7	1033	833.4	400	566.7	333.3	466.7	133.3	166.7	100	33.33
1251000	1059000	1979000	143000	4034	121000	165100	6068000	2900	1067	2800	36470	28180	366.7	2634	7837	1267	1767	466.7	666.7	866.7	900	1300	900	1033	433.3	533.3	800	433.3	166.7	200	100	0
1175000	1272000	2405000	150700	2967	134700	189000	6629000	4768	833.4	2967	44440	31490	866.7	2767	8471	1934	1900	733.4	533.3	833.4	800	1367	933.4	1100	433.3	766.7	466.7	733.4	33.33	166.7	66.67	33.33
1366000	1348000	2567000	174800	3601	160600	202700	7284000	4268	800	2700	49740	32590	500	2834	8971	2034	1533	600	500	633.4	600	1200	1000	966.7	333.3	833.4	500	733.4	200	266.7	0	100
1333000	1549000	2786000	199700	3067	175500	227200	8473000	4534	1300	2834	56540	35170	533.3	3367	10470	2167	1867	800	666.7	633.4	1067	1100	1033	1000	300	733.4	333.3	800	200	300	33.33	166.7
1499000	1579000	2968000	186500	4168	181200	231000	8883000	5101	1333	3434	61810	33160	666.7	3201	9638	2000	2267	566.7	566.7	366.7	1167	1633	966.7	1367	766.7	566.7	433.3	1000	166.7	400	133.3	66.67
1857000	1801000	3268000	217700	3634	184000	214100	8679000	5335	1167	3067	66780	34330	600	2767	9271	1667	1733	433.3	566.7	833.4	1167	900	1400	1100	366.7	733.4	300	733.4	100	166.7	66.67	33.33
1580000	1752000	3167000	209800	3401	196400	228100	8666000	4735	1467	3534	74500	32890	666.7	2734	8237	2167	1967	733.4	1067	833.4	866.7	1100	1300	1433	333.3	400	500	666.7	66.67	133.3	133.3	33.33
1851000	1605000	3573000	212700	4001	190400	204500	8377000	4301	1067	2934	77330	37640	800	2267	8237	1867	1900	300	500	533.3	833.4	1033	1067	900	566.7	466.7	433.3	600	133.3	166.7	100	0
1599000	1466000	3502000	202300	3534	194400	195200	7840000	3867	1033	3201	75580	31350	800	2834	8404	1533	1633	633.4	500	666.7	666.7	1100	1300	933.4	633.4	700	233.3	633.4	166.7	233.3	100	0
1559000	1408000	3535000	215100	2867	186600	200000	7686000	4068	1033	2634	67850	28780	566.7	2500	7737	1433	1733	466.7	466.7	733.4	633.4	1200	1000	900	333.3	633.4	300	366.7	33.33	133.3	66.67	33.33
1682000	1325000	3477000	172000	3367	173900	195000	7203000	3834	1167	2834	59830	30350	466.7	2634	7103	1834	1467	366.7	700	500	733.4	1000	1033	1167	333.3	666.7	400	666.7	33.33	233.3	66.67	66.67
1384000	1400000	3226000	172600	3567	175600	210600	7731000	4368	1133	3101	57210	33090	433.3	2867	9338	1667	1633	400	966.7	833.4	866.7	1333	1200	1633	433.3	500	666.7	700	200	300	33.33	66.67
1500000	1424000	3428000	196500	3801	188800	246200	8787000	5335	1300	3101	62880	38950	633.4	3234	10210	2334	2400	766.7	866.7	966.7	1200	1333	1567	1733	466.7	766.7	500	700	366.7	166.7	100	66.67
1714000	1397000	3448000	193400	3701	181100	272200	9660000	5902	1167	2700	63190	44140	933.4	4234	13180	2367	2367	666.7	1000	800	1333	1567	1433	1167	600	566.7	400	800	66.67	200	300	66.67
1841000	1297000	3120000	200000	4068	176500	294000	9754000	6836	1133	3767	59860	45850	533.3	3567	13880	3334	2400	766.7	1133	1000	1133	1967	1333	1600	600	1033	400	866.7	100	300	33.33	66.67
1568000	1265000	3164000	193200	3534	166000	305500	10190000	7303	966.7	2900	65330	51010	966.7	5035	16210	3267	2667	600	733.4	1033	1367	1867	1567	1400	700	1233	800	1433	200	500	200	0
1664000	1150000	3078000	193000	3101	159700	309600	10200000	7803	1267	2600	60670	54430	1400	5468	15780	3034	2934	966.7	1100	900	1167	1600	1867	1400	900	766.7	500	1100	233.3	366.7	66.67	33.33
1571000	1238000	3053000	203500	3601	157100	332000	10540000	7603	1000	3134	60570	60430	1233	5502	17250	3334	3234	900	1100	1100	1167	1867	1800	1567	800	1167	666.7	1100	200	566.7	200	100
1702000	1369000	2974000	212000	3534	176900	334500	10940000	7770	966.7	3434	67080	55770	900	5402	13910	3534	3000	700	1033	833.4	1233	2800	1900	1367	500	966.7	433.3	900	200	366.7	33.33	0
1826000	1543000	3104000	207500	3367	186700	315200	10810000	6636	1400	3134	67380	51010	833.4	4635	13240	2867	3167	833.4	933.4	966.7	666.7	1467	2067	1500	533.3	1167	633.4	1000	333.3	400	66.67	100
1584000	1541000	3182000	211600	4068	197000	263400	10050000	5068	1067	3301	69160	46020	833.4	3234	12740	1900	2200	533.3	1033	966.7	900	1800	1233	1167	633.4	866.7	300	600	233.3	300	33.33	66.67
1506000	1626000	3112000	199200	3901	189800	234800	10290000	5068	966.7	3334	72290	43030	800	4034	11770	2667	2767	633.4	1133	666.7	1167	1467	1433	1300	266.7	466.7	900	800	66.67	133.3	100	66.67
1805000	1609000	3123000	202700	3534	195500	211200	9346000	3334	1333	2767	69160	38480	1333	2500	10470	2134	2134	533.3	666.7	733.4	933.4	1267	1733	1533	766.7	700	700	800	100	266.7	0	33.33
1581000	1623000	3217000	201700	3667	189800	200800	8913000	3801	933.4	3334	70810	39520	633.4	3901	9739	1967	1934	700	566.7	966.7	933.4	1533	1033	1000	633.4	766.7	500	933.4	100	233.3	33.33	33.33
1651000	1599000	3446000	213600	4101	196300	222900	8788000	4968	1467	3201	71010	41730	1033	3834	11340	2600	2334	700	666.7	666.7	1000	1100	1033	1400	500	733.4	533.3	1000	300	133.3	0	66.67
1723000	1664000	3383000	234900	3701	200500	241700	8376000	5035	1500	3867	79650	42430	833.4	3167	11870	2834	2500	733.4	966.7	900	866.7	1467	1200	1367	600	1067	566.7	933.4	66.67	466.7	100	66.67
1747000	1629000	3318000	207300	4234	194600	217600	8779000	4835	1267	3634	71880	39020	566.7	3901	10970	2700	2834	600	666.7	666.7	900	1133	1367	1567	566.7	900	666.7	933.4	100	200	100	66.67
1749000	1568000	3059000	197300	3067	206300	224900	8829000	4968	1133	3867	68930	40860	633.4	4234	10240	3134	2200	466.7	866.7	900	933.4	1400	1133	1600	133.3	533.3	633.4	766.7	66.67	233.3	200	33.33
1563000	1625000	3421000	195100	3801	198500	242600	8962000	5235	1367	3334	74840	44270	866.7	4068	11470	2734	2867	866.7	1000	933.4	1267	1900	1400	1967	466.7	1000	466.7	800	100	300	66.67	0
1803000	1612000	3449000	217800	3834	214800	243900	9463000	5068	1300	2667	65070	37850	566.7	3334	11570	2500	3067	866.7	866.7	666.7	1033	1200	1667	1333	633.4	833.4	500	666.7	100	366.7	0	0
1531000	1606000	3336000	215400	3334	190100	240100	8534000	5268	1400	3034	73060	38920	633.4	3000	11410	2400	2334	1033	833.4	766.7	800	1667	1733	1000	500	766.7	466.7	733.4	66.67	266.7	200	0
1509000	1591000	3170000	203500	4001	191200	236000	8553000	4668	1167	2900	63890	36410	800	2967	10240	1567	2234	766.7	700	1067	1200	1167	1033	1433	433.3	766.7	600	1133	33.33	233.3	100	66.67
1559000	1593000	3109000	191300	3334	197100	220000	8345000	4168	1400	3134	60430	34360	733.4	2867	9472	1733	2500	566.7	433.3	766.7	600	1467	1167	1233	400	1067	266.7	700	33.33	100	100	0
1599000	1605000	3218000	192500	4101	187200	223500	8036000	5368	1033	2534	63620	35640	533.3	2634	8904	2034	2067	700	900	700	833.4	1233	966.7	1200	533.3	600	466.7	900	33.33	133.3	100	33.33
1516000	1647000	3221000	200100	3667	185500	219600	9001000	3434	1267	3134	60430	33760	800	2700	8771	2334	1767	666.7	1167	766.7	666.7	1333	1500	1433	600	466.7	366.7	633.4	100	200	66.67	33.33
1583000	1794000	3312000	205700	3734	203400	232400	8165000	4301	1000	3267	70540	34870	366.7	2000	8237	2034	1800	833.4	900	933.4	833.4	1467	1067	1000	566.7	1033	400	566.7	66.67	233.3	166.7	0
1460000	1747000	3141000	211400	4101	198900	229100	7837000	3734	1100	3401	60370	33190	733.4	2900	8037	2034	1500	633.4	800	500	1133	1300	1500	1033	600	566.7	400	700	66.67	366.7	100	0
1471000	1693000	3067000	193900	3834	194100	226800	7779000	3867	1333	3634	59290	35440	366.7	3034	8738	2067	1500	633.4	733.4	1000	900	1934	1000	866.7	433.3	800	400	700	66.67	200	33.33	33.33
1546000	1482000	3187000	178500	3501	172300	214200	7310000	3968	1200	2734	63250	36470	600	2500	9138	1834	1733	533.3	433.3	800	600	1200	1200	1333	666.7	733.4	566.7	833.4	66.67	233.3	33.33	0
1444000	1441000	3140000	186300	3467	171800	229400	7668000	4401	1000	3334	63020	36910	866.7	2834	9939	2400	1600	733.4	800	533.3	1600	1867	1033	866.7	433.3	766.7	600	900	100	100	133.3	33.33
1580000	1545000	3350000	202200	4234	186700	250700	8183000	5035	1100	3167	62380	37740	1000	2934	9438	2000	1533	533.3	966.7	700	933.4	1700	1433	1533	666.7	533.3	566.7	1067	33.33	133.3	33.33	33.33
1550000	1265000	3016000	186800	3467	169400	237800	8144000	5568	933.4	2834	63320	40320	766.7	3067	11810	2800	1767	633.4	766.7	1167	900	1934	1267	900	433.3	900	466.7	1000	233.3	266.7	33.33	66.67
1529000	1426000	3228000	198000	3501	183000	266800	8618000	5935	966.7	3201	63050	42260	833.4	3467	12070	2900	2734	500	1000	1033	1400	1433	1500	1167	600	900	600	966.7	266.7	333.3	166.7	66.67
1535000	1371000	3287000	185800	3467	177500	266200	9197000	5835	1100	3134	60170	42800	666.7	3701	12510	2034	2100	600	700	600	1100	1800	1333	1533	500	1033	633.4	933.4	300	166.7	166.7	0
1492000	1319000	3102000	175700	3467	164000	242100	8806000	5268	1267	2867	56710	41700	933.4	4034	12640	2434	2367	833.4	933.4	966.7	900	1600	1733	1233	600	766.7	433.3	1333	166.7	466.7	233.3	0
1542000	1306000	3085000	214900	3467	171600	263400	8928000	5568	1467	3167	62180	43500	666.7	4001	12270	3167	1867	566.7	966.7	966.7	966.7	1500	1834	1600	633.4	900	833.4	766.7	266.7	200	133.3	0
1730000	1349000	3280000	198400	3901	180900	261800	10110000	6069	1267	3801	61040	46080	633.4	3867	14280	2534	2400	600	933.4	1333	1067	1667	1467	1767	766.7	866.7	933.4	700	300	100	166.7	66.67
1473000	1489000	3163000	201400	3567	177400	244900	9316000	4301	1000	3101	63720	38580	600	4068	12440	2467	2034	866.7	566.7	633.4	800	2034	1067	1167	566.7	1167	666.7	966.7	100	233.3	200	100
1529000	1566000	3166000	206600	4034	192300	243600	9495000	4768	1233	3134	65030	40820	566.7	4001	11910	2467	2167	800	733.4	966.7	1167	1567	1267	1333	433.3	900	566.7	900	166.7	300	0	100
1650000	1656000	3215000	187100	3667	190100	248700	8729000	4768	1600	3034	65700	41590	866.7	3667	11310	2167	2500	500	900	800	800	1233	1367	1467	600	933.4	533.3	800	133.3	166.7	66.67	66.67
1439000	1713000	3266000	203200	3634	185200	238100	9312000	4968	1167	3301	63080	36710	566.7	4068	9105	2134	1800	666.7	700	1067	1100	2034	1133	1367	700	1100	433.3	1033	166.7	166.7	100	33.33
1473000	1737000	3130000	215600	3734	193000	220700	8277000	4201	1767	3401	64330	40290	1100	3434	10270	2434	1700	766.7	900	866.7	1300	1267	1400	1433	700	566.7	400	966.7	100	266.7	33.33	0
1632000	1835000	3162000	206600	3701	215700	244100	8686000	4901	1267	3167	64760	38010	500	2834	9939	2100	2167	466.7	600	666.7	766.7	1333	933.4	1400	533.3	733.4	500	900	233.3	166.7	66.67	0
1606000	1847000	3427000	213000	4268	199900	235900	8425000	4935	1433	3401	63790	37880	500	3067	9705	2500	2767	533.3	566.7	733.4	1133	1800	1100	933.4	500	666.7	466.7	1033	200	266.7	66.67	33.33
1668000	1809000	3431000	243600	3734	215300	238200	9080000	4234	1067	3367	66740	40260	633.4	3267	9739	1900	2034	633.4	833.4	1067	933.4	1533	1533	1467	500	933.4	433.3	666.7	133.3	266.7	133.3	66.67
1813000	2089000	3604000	235400	4534	236000	250700	9391000	5335	966.7	3801	72920	39790	833.4	2767	10040	2567	1600	700	900	1133	900	1667	1267	800	633.4	733.4	633.4	866.7	100	233.3	33.33	33.33
1625000	2076000	3589000	234700	4168	210700	253500	8962000	4234	1300	3867	69360	37310	766.7	3367	9605	2200	1700	700	1167	1100	1333	1600	1267	1367	733.4	833.4	533.3	833.4	200	233.3	100	33.33
1663000	2068000	3637000	224900	3367	217700	246200	8747000	4501	1200	3101	73090	37740	866.7	3567	9972	2234	2234	366.7	666.7	566.7	800	1400	1467	766.7	566.7	833.4	500	866.7	66.67	466.7	33.33	0
1691000	1810000	4273000	237900	4034	219500	223100	7830000	4735	1333	2934	72290	31920	766.7	2467	7970	2167	1267	433.3	1100	833.4	700	1000	966.7	1100	833.4	766.7	200	433.3	66.67	200	33.33	0
1759000	1600000	4915000	268400	3301	246200	193900	6579000	3667	1200	2667	97760	26770	533.3	1800	6002	1200	966.7	400	666.7	400	600	1133	733.4	700	333.3	500	333.3	600	200	200	0	66.67
1888000	1256000	5710000	215500	4068	227000	146100	5246000	3101	966.7	3034	92740	21690	766.7	1700	4935	833.4	1600	500	566.7	300	333.3	833.4	933.4	666.7	266.7	400	100	200	133.3	100	33.33	33.33
1742000	1035000	5712000	222100	3767	229000	106800	4156000	1967	1133	2434	87450	14650	400	866.7	4101	1300	600	133.3	500	166.7	433.3	600	200	433.3	166.7	800	166.7	200	0	200	33.33	0
1504000	717800	5449000	208000	3467	209800	80080	3000000	1700	1067	2867	82000	11610	166.7	733.4	3334	533.3	1033	200	133.3	200	266.7	266.7	300	366.7	233.3	133.3	100	300	0	133.3	66.67	0
1596000	538200	4781000	170600	3567	177800	58020	2200000	1333	1233	3067	71750	7837	333.3	833.4	2934	466.7	400	166.7	400	200	200	300	266.7	433.3	133.3	33.33	66.67	200	66.67	0	33.33	33.33
1368000	437000	5041000	170800	3767	184200	46080	1672000	733.4	1533	2734	82910	5969	366.7	600	1367	333.3	333.3	33.33	200	133.3	33.33	266.7	100	166.7	66.67	66.67	266.7	0	0	66.67	0	0
1554000	316800	4947000	164600	3901	185000	33830	1268000	733.4	1267	3134	77160	3934	200	400	1367	466.7	200	33.33	366.7	100	133.3	200	66.67	166.7	33.33	66.67	33.33	33.33	0	133.3	0	0
1067000	241500	4904000	152200	3867	185800	27740	1068000	533.3	1500	3034	79850	3034	133.3	566.7	1067	200	100	133.3	133.3	0	33.33	166.7	66.67	166.7	100	0	0	133.3	0	100	0	66.67
983000	186200	4495000	135100	3501	164000	22360	781100	566.7	933.4	2567	70980	2500	166.7	266.7	733.4	266.7	166.7	0	233.3	33.33	66.67	33.33	133.3	0	66.67	33.33	33.33	33.33	0	133.3	0	66.67
968700	165700	4587000	125600	3567	148000	16410	721400	166.7	833.4	2567	61170	2200	200	266.7	866.7	100	133.3	66.67	166.7	0	133.3	166.7	66.67	33.33	33.33	0	0	33.33	0	33.33	33.33	0
1319000	123100	4556000	144300	3968	159400	16450	812400	433.3	800	2834	70200	1333	233.3	133.3	666.7	200	133.3	0	133.3	33.33	33.33	0	133.3	100	166.7	0	0	0	0	133.3	33.33	0
1186000	155700	4937000	137500	3667	151300	23400	878500	633.4	833.4	3067	74940	3234	300	366.7	1233	166.7	333.3	66.67	233.3	133.3	66.67	100	266.7	33.33	166.7	66.67	100	100	0	100	33.33	0
1516000	278700	4997000	152300	3334	180600	59730	1960000	1000	1400	2634	76290	8437	266.7	466.7	2500	500	500	366.7	233.3	266.7	133.3	333.3	233.3	266.7	66.67	133.3	66.67	266.7	33.33	100	33.33	0
1219000	267200	4409000	132800	4234	151900	45680	1674000	1033	1100	2134	71450	6269	333.3	466.7	1834	433.3	400	166.7	300	133.3	300	166.7	233.3	300	66.67	133.3	66.67	200	66.67	133.3	0	33.33
1215000	418400	4575000	169100	3534	156700	79140	2688000	2167	1367	3467	74840	10070	333.3	1167	3701	766.7	500	300	233.3	166.7	400	533.3	500	466.7	133.3	200	100	333.3	166.7	33.33	66.67	66.67
1159000	572700	3728000	142100	3634	151000	87320	3275000	1733	1033	2600	55640	14750	366.7	1367	4468	933.4	700	133.3	666.7	300	466.7	666.7	633.4	433.3	66.67	300	166.7	100	0	66.67	0	0
1334000	684400	3503000	156900	3201	154800	92840	4051000	2567	1267	3267	63250	16380	500	1500	4468	1033	733.4	333.3	366.7	366.7	266.7	600	666.7	600	266.7	300	133.3	200	66.67	233.3	66.67	0
1348000	804200	3780000	173700	3501	172700	109700	4303000	2567	1200	2934	70470	15810	666.7	1667	5402	1267	900	400	366.7	200	633.4	500	633.4	366.7	166.7	500	200	300	100	100	66.67	33.33
1860000	879500	5261000	209100	3801	224200	117100	4526000	2367	1167	3067	92670	16280	466.7	1567	5302	700	833.4	366.7	500	400	433.3	600	433.3	433.3	300	600	200	300	33.33	133.3	0	0
1656000	860000	5239000	199500	3034	197800	103200	4081000	2500	1233	2267	84220	17580	300	1733	6135	1300	1300	533.3	600	766.7	733.4	833.4	900	966.7	400	666.7	366.7	900	166.7	166.7	33.33	66.67
1480000	1122000	4170000	191200	3734	187300	165300	5952000	3734	1100	2800	63220	24630	266.7	2234	6969	1567	1567	200	800	666.7	366.7	866.7	866.7	733.4	233.3	366.7	466.7	533.3	166.7	166.7	66.67	0
1231000	926400	3018000	153500	4034	148400	152900	5577000	3667	1233	3467	51010	22630	433.3	2100	6035	1233	966.7	300	533.3	400	500	700	900	733.4	366.7	666.7	333.3	466.7	166.7	166.7	66.67	0
1467000	1164000	3060000	166300	4034	162900	167100	6478000	3134	1467	2967	57410	27170	333.3	2267	6803	1733	1767	533.3	466.7	833.4	500	1033	433.3	866.7	433.3	533.3	433.3	766.7	66.67	233.3	33.33	0
1429000	1477000	3409000	183600	3434	183100	200900	7081000	4501	1567	3234	65100	27240	633.4	2834	8104	1533	1867	500	333.3	866.7	933.4	1167	1300	1000	366.7	366.7	300	766.7	166.7	300	100	66.67
1446000	1641000	3582000	203200	3567	199400	205500	7673000	4601	966.7	3234	64160	29210	433.3	2567	8604	1867	1367	866.7	733.4	633.4	866.7	1533	833.4	966.7	666.7	700	466.7	900	100	233.3	33.33	100
1578000	2032000	3474000	221600	4001	230200	223300	7439000	3834	1433	2400	64700	31920	433.3	2367	7236	1700	1400	600	1000	833.4	966.7	1633	933.4	866.7	400	833.4	566.7	666.7	166.7	100	33.33	33.33
1367000	2231000	3217000	204100	4001	211600	181100	7273000	3601	733.4	3201	61140	26770	633.4	2067	6336	1200	1700	533.3	733.4	533.3	933.4	1100	1000	866.7	400	766.7	466.7	733.4	66.67	200	66.67	0
1145000	3875000	2623000	225900	3667	193700	158700	8273000	3634	1433	3267	48460	21730	400	1433	5235	1567	1133	500	366.7	600	766.7	1267	866.7	1133	366.7	533.3	300	333.3	100	100	33.33	0
1165000	4951000	2432000	215400	4001	164500	141000	9706000	4234	800	3467	43670	18220	333.3	1667	5101	1000	1233	300	366.7	766.7	700	1167	900	866.7	266.7	666.7	300	466.7	66.67	100	33.33	133.3
1203000	5565000	2470000	239800	3634	179600	151200	10730000	4901	1333	2800	50170	22560	566.7	1767	6569	1133	2034	266.7	766.7	566.7	600	1300	866.7	766.7	533.3	600	533.3	466.7	0	133.3	0	0
1342000	5475000	2673000	231900	4334	179600	162100	11430000	4835	1000	3701	51310	28310	233.3	2967	7970	1900	1600	633.4	500	900	766.7	1433	1133	733.4	433.3	933.4	300	800	133.3	233.3	166.7	100
1307000	4303000	2850000	221800	4001	171600	184800	11200000	4201	1300	3101	54290	34900	666.7	3567	8637	2167	1934	333.3	800	433.3	1100	1433	1567	1333	533.3	966.7	433.3	600	133.3	633.4	33.33	66.67
1631000	3649000	3130000	213300	3367	192000	216900	11220000	5535	1067	3067	59830	38010	900	3601	13080	2034	2000	1000	800	1000	1233	1733	1267	1633	500	966.7	700	1300	133.3	300	100	0
1542000	3003000	3345000	238800	4168	207100	227400	10560000	6803	1267	3034	64490	41360	800	4301	15180	3034	2534	666.7	900	833.4	866.7	1300	1700	1067	600	900	433.3	800	100	266.7	100	133.3
1769000	2654000	3389000	233400	4268	197300	225800	10260000	5068	1067	3534	66170	42900	1000	4134	14040	2167	2134	733.4	1033	600	1067	1934	1333	1333	633.4	966.7	300	966.7	166.7	100	100	66.67
1585000	2407000	3402000	237600	4134	198500	232600	9586000	5135	800	3401	61570	41530	766.7	3701	11210	2800	2234	733.4	966.7	1167	1100	1633	1700	1167	666.7	1067	666.7	600	233.3	333.3	100	33.33
1760000	2228000	3409000	218400	4168	208200	234800	9217000	4701	1467	3000	63150	36810	933.4	3401	9672	2534	1834	633.4	700	900	533.3	1467	1267	1333	433.3	733.4	566.7	733.4	66.67	233.3	166.7	33.33
1496000	2131000	3193000	211000	4534	190100	245200	8687000	4668	1467	3334	59290	34430	866.7	2834	11310	2134	2034	366.7	800	933.4	833.4	1400	1567	1167	366.7	933.4	366.7	833.4	33.33	400	33.33	66.67
1461000	1921000	3013000	211100	3801	193300	209300	8143000	3167	1200	3567	61640	33430	600	2434	9805	1233	1867	766.7	666.7	633.4	966.7	1467	833.4	1400	400	766.7	500	766.7	100	66.67	100	33.33
1433000	2045000	3217000	203900	3867	188400	231900	8660000	4434	1467	2934	57980	31990	466.7	2800	9605	1934	1533	400	600	733.4	866.7	1367	966.7	1267	466.7	833.4	266.7	766.7	100	133.3	100	0
1443000	2020000	3065000	217200	3901	196200	247600	8993000	4301	1133	3367	65470	37910	666.7	3401	11770	2167	1767	666.7	533.3	766.7	1133	1633	1800	1533	600	800	766.7	866.7	200	366.7	133.3	0
1844000	2193000	3654000	233000	4201	226900	310700	10440000	5668	1900	3534	76920	46320	866.7	3467	13710	1733	2434	600	1067	1133	1200	1900	1733	1200	666.7	933.4	566.7	833.4	400	166.7	133.3	33.33
1930000	2495000	4461000	296900	3634	295700	441900	14420000	8237	2000	3501	102600	61810	1133	6069	19650	4168	4534	1700	1500	1667	1900	2800	2467	2767	1133	1633	866.7	1200	300	800	200	33.33
3010000	3054000	5712000	369600	4568	321300	424200	17420000	10270	1367	5835	115000	81230	1733	6669	20960	3968	3467	1300	1400	1100	1533	2467	2000	2167	600	1000	666.7	900	333.3	433.3	233.3	66.67
2489000	2282000	4845000	333100	4001	268000	374800	13410000	7169	1200	4901	75880	59490	600	3968	14080	2334	1633	433.3	766.7	766.7	833.4	1633	966.7	933.4	366.7	566.7	466.7	733.4	166.7	233.3	33.33	66.67
1378000	1202000	2302000	155100	3567	110900	142600	5877000	3401	866.7	3968	40360	30480	566.7	2200	6202	1333	1567	333.3	566.7	533.3	766.7	400	766.7	900	333.3	500	166.7	333.3	133.3	166.7	0	0
969500	961500	1683000	145500	3000	93780	118600	4852000	2400	1167	4134	34530	32020	700	1467	5502	1100	1300	433.3	666.7	600	666.7	733.4	833.4	766.7	233.3	533.3	466.7	966.7	166.7	200	0	0
1238000	1218000	2142000	146700	3968	117700	142700	6622000	3167	1267	5135	44510	44440	500	1900	7236	1267	1300	466.7	366.7	633.4	800	1067	800	666.7	433.3	600	666.7	566.7	66.67	233.3	100	100
1340000	1289000	2576000	159600	3734	135000	161600	7669000	3501	866.7	6202	48400	50270	500	2400	7703	1467	1667	533.3	466.7	800	533.3	1100	1100	833.4	533.3	633.4	400	933.4	100	166.7	0	33.33
1515000	1705000	2995000	222000	4601	189900	227500	9972000	3867	1433	6602	65330	54900	700	3367	10540	2500	2300	766.7	733.4	933.4	1000	1767	1700	1233	500	966.7	466.7	1167	200	200	133.3	66.67
1885000	2061000	3611000	272200	4368	211400	259300	11000000	4301	1300	5035	72120	53320	733.4	3734	10570	1800	2300	633.4	1067	1033	1467	1834	1333	1400	600	866.7	600	1167	66.67	266.7	133.3	66.67
1952000	2503000	4117000	277800	4268	243700	310500	12320000	6002	1267	5335	85530	57880	566.7	2867	11770	2034	3000	1100	1033	833.4	800	1934	1867	2234	566.7	1200	566.7	1400	166.7	233.3	133.3	100
2287000	2657000	4417000	323600	4368	274300	330300	12310000	5502	1433	4034	85530	59760	700	3267	12210	2634	2834	666.7	1167	1067	1567	1633	1500	1934	700	1200	533.3	1233	133.3	133.3	100	66.67
2038000	2761000	4427000	308400	4768	273800	315000	12890000	4668	1167	4068	83150	58960	933.4	3734	11540	2867	2600	766.7	1367	1300	1567	2367	1834	1500	800	933.4	533.3	933.4	66.67	133.3	66.67	33.33
2097000	2709000	4359000	266500	3701	272800	323700	11660000	5402	1267	3634	81460	51510	666.7	4134	12310	2367	2767	733.4	1633	1200	1233	1900	1200	1667	566.7	1033	833.4	866.7	133.3	366.7	133.3	0
2166000	2563000	3912000	278000	3201	250400	345900	12580000	6736	1533	4568	72990	54500	1100	4201	13080	2367	2200	866.7	1000	1200	1500	2100	1533	1500	533.3	1000	633.4	1067	133.3	400	33.33	100
2058000	2277000	3787000	254500	3467	222600	309000	12510000	6869	1167	5201	82710	51880	900	4368	13880	3601	2900	1067	800	1167	1067	1467	1767	1967	766.7	1100	766.7	1233	233.3	500	66.67	33.33
2742000	2302000	3869000	271400	3934	244900	347100	12780000	7103	1467	4234	78610	53150	1033	4068	14210	2767	2334	933.4	666.7	1100	1300	2400	1233	1467	933.4	1200	600	966.7	133.3	333.3	166.7	66.67
1957000	2306000	3769000	246700	3901	239900	271500	11470000	6102	1100	4268	69970	44680	766.7	3767	12170	2300	2234	500	1033	733.4	1067	2000	1600	1600	533.3	666.7	533.3	1100	100	200	166.7	100
1743000	2254000	3734000	240100	4068	216400	257300	10270000	5035	1300	3901	68190	40620	633.4	3101	9672	1667	1934	533.3	1067	933.4	1100	1800	1600	1233	666.7	866.7	566.7	1000	133.3	466.7	33.33	33.33
1715000	2199000	3659000	227900	4168	203000	278700	10030000	5869	900	3701	74270	39950	366.7	3067	9438	2000	1967	733.4	633.4	700	800	900	1400	966.7	566.7	633.4	366.7	633.4	233.3	333.3	133.3	66.67
1768000	2170000	3544000	235700	3334	188200	237600	10080000	5602	833.4	3501	66340	38510	833.4	2734	8704	1900	1800	800	900	933.4	900	1233	1200	1067	300	933.4	633.4	800	166.7	200	66.67	0
1766000	2042000	3498000	220900	3367	207300	231200	9659000	5201	1233	3201	67050	36470	633.4	3401	10240	2100	2034	733.4	900	433.3	1000	1600	1200	1233	533.3	633.4	366.7	733.4	66.67	66.67	100	0
1664000	1733000	3273000	216400	3867	183000	221800	8576000	4568	1033	3401	61000	35540	900	3734	9171	2034	2200	500	700	1167	1233	1800	1667	1567	566.7	866.7	366.7	966.7	133.3	133.3	66.67	66.67
1680000	1802000	3523000	226700	2967	205300	236100	8768000	4234	1367	3534	68420	35340	866.7	2967	9438	2167	1467	533.3	1000	700	666.7	1433	933.4	1200	600	766.7	500	700	33.33	166.7	66.67	0
1603000	1749000	3305000	210500	3467	207300	221000	9166000	4835	1067	2967	66810	36470	766.7	2934	9805	2100	2000	666.7	833.4	833.4	833.4	1167	1033	1267	300	766.7	366.7	600	133.3	200	133.3	33.33
1645000	1718000	3332000	198200	3467	197100	239300	8758000	5135	1467	3367	69530	38480	633.4	3000	10070	2367	2200	700	700	933.4	900	1467	1500	1033	566.7	1167	433.3	966.7	33.33	233.3	100	0
1681000	1919000	3464000	218500	3467	196400	231800	8932000	4368	1367	2600	64930	34400	933.4	3000	8804	2200	2000	333.3	633.4	533.3	1167	1067	1667	1533	633.4	733.4	600	866.7	133.3	200	133.3	0
1698000	2014000	3491000	227700	3801	224200	225500	8717000	4534	1367	3201	69400	35770	733.4	2200	7370	2467	1433	466.7	633.4	533.3	966.7	1433	1433	1367	566.7	700	566.7	433.3	33.33	166.7	33.33	100
1691000	2216000	3518000	224000	3968	218600	223800	8848000	3834	1333	3234	64960	35700	733.4	2867	8938	1934	2000	566.7	600	700	766.7	1967	1000	1733	733.4	900	433.3	1200	200	166.7	33.33	33.33
1495000	1881000	3432000	214200	4401	209300	217500	8040000	3901	1500	3534	69260	33830	533.3	2700	9972	2167	2034	466.7	600	933.4	1333	1333	1133	1233	366.7	500	300	633.4	66.67	200	133.3	66.67
1813000	1749000	3753000	202200	3634	202200	220800	7701000	4401	1000	3234	70980	34300	533.3	3101	7903	1600	1533	700	1200	833.4	1000	1533	1400	1000	400	633.4	333.3	966.7	100	266.7	133.3	33.33
1628000	1711000	3546000	206300	3734	205000	242000	8534000	4601	1233	3801	62680	36540	933.4	3167	10840	2100	2000	800	700	966.7	1067	1633	1767	900	400	933.4	566.7	766.7	200	266.7	33.33	66.67
1842000	1799000	3496000	237500	3867	211900	288600	10410000	4701	1800	3501	63590	36440	766.7	3234	9004	1733	1934	800	500	766.7	1033	1233	1167	1133	600	633.4	466.7	766.7	66.67	500	133.3	33.33
1761000	1614000	3373000	232100	4134	204700	267700	9788000	4501	833.4	3301	72790	42900	800	3301	12680	2400	2767	800	800	1167	1167	1867	1300	1500	533.3	800	633.4	1067	100	133.3	133.3	33.33
1563000	1612000	3332000	224600	3501	192700	261400	9778000	4534	1300	3801	64900	40720	1033	3701	11840	2300	2367	733.4	1067	800	1033	2067	1700	1333	400	600	633.4	766.7	133.3	333.3	66.67	100
1691000	1717000	3526000	232500	3968	191000	253300	9040000	4234	966.7	3601	67950	34900	666.7	3567	11240	2034	2434	333.3	733.4	866.7	633.4	1400	1233	1167	633.4	733.4	433.3	1133	200	366.7	100	33.33
1554000	1991000	3418000	204000	3801	205200	238000	7595000	3901	1167	3234	61410	30890	333.3	2367	8170	1667	1900	533.3	766.7	833.4	966.7	933.4	933.4	1233	633.4	533.3	433.3	733.4	66.67	166.7	33.33	33.33
1489000	1896000	3497000	201800	3534	203500	221700	7612000	3134	1167	3401	63080	32460	533.3	2700	7136	1667	1567	500	833.4	1167	866.7	1300	1400	1000	333.3	733.4	466.7	733.4	66.67	33.33	66.67	66.67
1581000	1996000	3336000	202100	4301	226000	230200	7253000	3000	933.4	3234	62650	33090	500	1934	7603	1633	2067	566.7	366.7	800	700	1467	1233	1067	366.7	700	433.3	733.4	166.7	233.3	33.33	0
1426000	2016000	3176000	214900	3401	215700	226600	7138000	3501	966.7	3801	62210	34260	600	2334	8237	1333	1700	400	533.3	900	1033	1367	1100	1267	766.7	566.7	600	633.4	66.67	233.3	66.67	33.33
1452000	1861000	3199000	208000	3101	201700	245000	7755000	3434	1400	3601	68560	34930	666.7	2834	8304	1800	1500	366.7	800	633.4	833.4	1533	966.7	1067	600	566.7	366.7	666.7	33.33	300	133.3	0
1405000	1803000	3266000	209700	4468	194200	226300	7836000	4034	1267	2667	62380	32490	533.3	2334	7737	1967	2067	700	733.4	933.4	566.7	1500	1267	833.4	366.7	633.4	466.7	666.7	133.3	100	33.33	33.33
1445000	1806000	3181000	212100	3367	198100	235900	8067000	3934	1500	3667	64560	33760	866.7	2767	9305	1700	1967	600	700	766.7	633.4	1233	900	1233	500	666.7	666.7	433.3	133.3	200	33.33	0
1503000	1739000	3319000	199600	3567	190500	227800	8046000	4134	1267	2667	63960	36510	500	2534	9538	2067	1200	466.7	566.7	533.3	666.7	1533	1033	1067	666.7	866.7	500	366.7	200	200	233.3	66.67
1565000	1564000	3017000	208400	3834	187200	240800	8421000	4201	1567	3601	57980	35800	466.7	2634	11040	1967	1834	566.7	866.7	700	1200	1500	900	1367	600	633.4	533.3	900	333.3	300	200	0
1597000	1614000	3258000	203300	4434	185300	249600	9029000	4901	1067	4468	57210	45880	1033	3534	11640	2367	2600	566.7	1033	766.7	1067	2034	1834	1167	866.7	800	700	733.4	100	166.7	66.67	33.33
1593000	1450000	2928000	209900	3601	188700	270700	10290000	6035	1033	4101	57650	48900	1000	4801	14040	3067	2534	633.4	1267	866.7	900	2000	1333	1500	600	833.4	733.4	966.7	100	200	100	66.67
1688000	1778000	3178000	218200	3701	200300	288800	10080000	5768	1367	4334	60740	41030	833.4	3567	12110	2334	2000	666.7	933.4	833.4	1333	1400	1267	1500	566.7	933.4	333.3	633.4	200	200	100	66.67
1657000	1549000	2885000	206700	3734	196200	245200	9135000	5535	1167	4134	58990	37580	733.4	4534	12210	2467	2100	733.4	866.7	800	1067	1467	1600	1767	766.7	966.7	366.7	1033	133.3	266.7	166.7	0
1562000	1760000	3201000	210600	3367	185600	235400	8752000	3401	1200	3734	55940	39890	700	3167	9438	1733	1667	700	633.4	700	666.7	2067	1467	1100	366.7	1233	200	1167	200	333.3	133.3	33.33
1455000	1791000	2910000	237500	4068	197900	265700	8757000	4768	1367	4301	62250	41590	533.3	3834	12010	2600	1900	600	600	933.4	700	1200	1300	1067	800	800	566.7	800	66.67	233.3	0	66.67
1780000	1857000	3122000	200200	3667	209600	268500	8506000	4635	1100	3934	56510	42370	633.4	3567	12840	2934	2300	666.7	533.3	433.3	1133	1300	1067	1200	500	600	333.3	1000	233.3	166.7	133.3	66.67
1245000	1592000	2702000	168400	3968	194400	216200	6740000	2967	1400	3101	53720	34870	700	3534	8471	2134	1667	700	966.7	866.7	966.7	1433	933.4	1267	533.3	500	300	933.4	100	200	66.67	0
1305000	1328000	3901000	195500	3234	217900	133800	4611000	2434	933.4	3401	81230	20120	466.7	1967	5435	1167	1200	300	266.7	266.7	233.3	500	333.3	533.3	400	433.3	433.3	266.7	66.67	33.33	33.33	0
1551000	679200	4438000	165200	3201	162200	89030	3240000	1767	1333	2534	68760	14850	200	1333	4868	533.3	733.4	366.7	366.7	233.3	200	700	266.7	466.7	233.3	333.3	200	266.7	133.3	166.7	66.67	66.67
1518000	614300	4870000	185000	3234	195500	79040	3319000	2167	1367	4034	73830	14240	233.3	1467	3501	700	700	233.3	266.7	266.7	233.3	866.7	400	533.3	66.67	300	200	466.7	0	66.67	66.67	66.67
1957000	688800	5751000	219200	4068	220100	84630	3626000	1800	833.4	3234	93280	16180	466.7	1167	4368	900	800	300	500	333.3	400	800	700	633.4	233.3	433.3	333.3	266.7	33.33	100	33.33	0
1626000	868200	4553000	198000	4034	206400	110200	4527000	1934	1167	3334	90380	28110	733.4	2934	9338	1633	1067	433.3	533.3	466.7	533.3	800	833.4	500	200	366.7	200	300	166.7	200	133.3	33.33
1413000	840000	3692000	186100	3801	170000	117900	4422000	2534	1167	3367	66640	20390	900	1900	6202	1233	1133	200	300	433.3	400	700	533.3	533.3	200	266.7	266.7	233.3	33.33	133.3	0	33.33
1565000	649000	5430000	203900	4334	190900	75340	2729000	1400	1033	3201	79950	8604	366.7	766.7	2734	433.3	500	100	233.3	100	166.7	300	166.7	200	66.67	166.7	33.33	100	33.33	33.33	0	0
1404000	340700	4378000	167700	3367	176100	47320	1770000	966.7	1033	3000	76550	6803	166.7	500	2167	233.3	266.7	166.7	133.3	200	166.7	133.3	200	300	166.7	100	33.33	66.67	0	33.33	0	0
[truncated: 12,688 more rows]
